# Supplementary material
Source: PubMed Central journal article supplement (PMC2923465)
Supplement: ja105005t_si_001.pdf [file ja105005t_si_001.pdf]

**Supporting Information for**  
**Difluorobenzocyclooctyne: synthesis, reactivity,**  
**and stabilization by  $\beta$ -cyclodextrin**

**Ellen M. Sletten, Hitomi Nakamura, John C. Jewett and Carolyn R. Bertozzi \***

*Departments of Chemistry, Molecular and Cellular Biology, University of California, Berkeley, CA 94720. Howard Hughes Medical Institute, USA. The Molecular Foundry, Lawrence Berkeley National Laboratory, Berkeley, CA 94720*

## Table of Contents

|                                                                                      |     |
|--------------------------------------------------------------------------------------|-----|
| General experimental procedure.....                                                  | S3  |
| CPMAS <sup>13</sup> C-NMR procedure.....                                             | S3  |
| Characterization of the oligomerization products of DIFBO.....                       | S3  |
| Figure S1.....                                                                       | S4  |
| Figure S2.....                                                                       | S6  |
| Determination of regiochemistry of triazole isomers <b>11</b> and <b>12</b> .....    | S8  |
| Figure S3 and S4.....                                                                | S8  |
| NMR of DIFBO-β-cyclodextrin complex (Figure S5, S6).....                             | S9  |
| HPLC traces of synthetic standards (Figure S7).....                                  | S10 |
| Degradation assay for DIFBO-β-cyclodextrin complex (Figure S8, S9).....              | S11 |
| Synthesis of monobenzocyclooctyne <b>16</b> .....                                    | S12 |
| Scheme S1.....                                                                       | S12 |
| Determination of second-order rate constants .....                                   | S13 |
| Figure S10.....                                                                      | S13 |
| Figure S11.....                                                                      | S14 |
| Synthesis and reactivity of ketones <b>19-22</b> .....                               | S15 |
| <sup>1</sup> H-NMR spectra of compounds <b>4-6</b> , <b>8-14</b> , <b>16</b> .....   | S21 |
| <sup>13</sup> C-NMR spectra of compounds <b>4-6</b> , <b>8-14</b> , <b>16</b> .....  | S32 |
| <sup>19</sup> F-NMR spectra of compounds <b>4-6</b> , <b>8-14</b> .....              | S42 |
| <sup>1</sup> H-NMR spectra of ketones <b>19-22</b> and compounds <b>S6-S11</b> ..... | S52 |
| X-ray crystallography.....                                                           | S57 |
| Trimer <b>9</b> (Figure S12).....                                                    | S57 |
| Trimer <b>10</b> (Figure S13).....                                                   | S64 |
| Dimer <b>13</b> (Figure S14).....                                                    | S77 |
| Dimer <b>14</b> (Figure S15).....                                                    | S87 |

## **General Experimental Procedure**

All chemical reagents were purchased from Sigma-Aldrich, Acros, and TCI and used without purification unless noted otherwise. Anhydrous DMF and MeOH were purchased from Aldrich or Acros in sealed bottles; all other solvents were purified as described by Pangborn *et al.*<sup>1</sup> In all cases, solvent was removed by reduced pressure with a Buchi Rotovapor R-114 equipped with a Welch self-cleaning dry vacuum. Products were further dried by reduced pressure with an Edwards RV5 high vacuum. Lyophilization was performed on a LABCONCO FreeZone<sup>®</sup> instrument equipped with an Edwards RV2 pump. Thin layer chromatography was performed with EMD 60 Å silica gel plates. Flash chromatography was performed using Silicycle<sup>®</sup> 60 Å 230-400 mesh silica. All <sup>1</sup>H, <sup>13</sup>C, and <sup>19</sup>F NMR spectra are reported in ppm and referenced to solvent peaks (<sup>1</sup>H and <sup>13</sup>C). Spectra were obtained on Bruker AVQ-400, AVB-400, DRX-500, AV-500, or AV-600 instruments. CPMAS <sup>13</sup>C-NMR was performed on an AV-500 spectrometer (see below for further detail). Electron impact (EI) and electrospray ionization (ESI) mass spectra were obtained from the UC Berkeley Mass Spectrometry Facility. X-ray crystallography structures were obtained from the UC Berkeley X-ray Crystallography Facility (see page S56-S92 for details).

## **CPMAS <sup>13</sup>C-NMR procedure**

Solid-state NMR measurements of β-cyclodextrin and DIFBO-β-cyclodextrin complex were taken at rt on a 11.75 T Bruker Avance NMR spectrometer equipped with a double resonance magic angle spinning (MAS) probe. Samples were spun at 10 kHz using zirconia rotors of 4 mm outer diameter and 80 μL sample volume. The 1-D <sup>13</sup>C cross-polarization (CP) experiments were conducted using a <sup>1</sup>H 90° pulse of 4.2 μs, a 59 kHz <sup>1</sup>H-decoupling field, 2 ms contact time, 2 s recycle delay and 1800-4000 scans. The <sup>13</sup>C chemical shifts were referenced against the adamantane <sup>13</sup>C resonances at 29.45 and 38.48 ppm.

## **Oligomerization products of DIFBO**

**Trimer 9.** Elutes from reverse phase (C-18) HPLC at 29.7 min using CH<sub>3</sub>CN/H<sub>2</sub>O solvent system with a gradient of 50% to 100% CH<sub>3</sub>CN over 25 min followed by 10 min of 100% CH<sub>3</sub>CN. R<sub>f</sub> = 0.45 in 4:1 hexane/EtOAc. <sup>1</sup>H-NMR (500 MHz, CDCl<sub>3</sub>): δ 7.51 (bs, 1H), 7.33 (td, *J* = 7.5, 0.9 Hz, 1H), 7.23 (*J* = 7.5, 1.0 Hz, 1H), 7.18 (d, *J* = 7.5, 1H), 7.00-7.09 (m, 4H), 6.83-6.89 (m, 3H), 6.68 (d, *J* = 7.3 Hz, 1H), 2.79-2.84 (m, 1H), 2.53-2.59 (m, 3H), 2.40 (apparent t, *J* = 6.4 Hz, 2H), 2.31 (td, *J* = 12.9, 5.6 Hz, 1H), 1.88-2.08 (m, 4H), 1.76-1.80 (m, 1H), 1.64-1.73 (m, 2H), 1.55-1.62 (m, 1H), 1.24-1.47 (m, 3H). <sup>13</sup>C-NMR (150 MHz, CDCl<sub>3</sub>): δ 141.6 (dd, *J* = 5, 4 Hz), 141.02, 140.99, 139.9 (dd, *J* = 30, 22 Hz), 139.6 (t, *J* = 4 Hz), 138.9, 138.7 (apparent t, *J* = 3 Hz), 138.6 (d, *J* = 3 Hz), 138.3, 137.4, 136.8 (t, *J* = 23 Hz), 135.5 (dd, *J* = 33, 26 Hz), 133.4 (q, *J* = 5 Hz), 132.1, 131.2, 128.5, 128.08, 128.07, 128.01, 127.2, 127.1, 125.1 (dd, *J* = 247, 244 Hz), 125.0, 124.7, 124.1, 123.1 (dd, *J* = 247, 244 Hz), 122.8 (dd, *J* = 254, 240 Hz), 38.7 (td, *J* =

---

<sup>1</sup> Pangborn, A. B.; Giardello, M. A.; Grubbs, R. H.; Rosen, R. K.; Timmers, F. J. *Organometallics* **1996**, *15*, 1518.

28, 7 Hz), 37.5 (t,  $J = 30$  Hz), 35.8 (t,  $J = 28$  Hz), 30.64, 30.61, 30.1, 24.0 (apparent q,  $J = 4$  Hz), 23.6 (dd,  $J = 7, 3$  Hz), 21.2 (d,  $J = 10$  Hz).  $^{19}\text{F}$ -NMR (564 MHz,  $\text{CDCl}_3$ ):  $\delta$  -59.1 (d,  $J = 255$  Hz, 1F), -66.7 (d,  $J = 274$  Hz, 1F), -70.0 (dd,  $J = 276, 71$  Hz, 1F), -71.4 (dtt,  $J = 257, 70, 13$  Hz, 1F), -75.8 (ddd,  $J = 275, 33, 10$  Hz, 1F), -76.9 (dq,  $J = 277, 30$  Hz, 1F). HRMS (EI): Calcd. for  $\text{C}_{36}\text{H}_{30}\text{F}_6^+ [\text{M}]^+$  576.2252, found 576.2265.

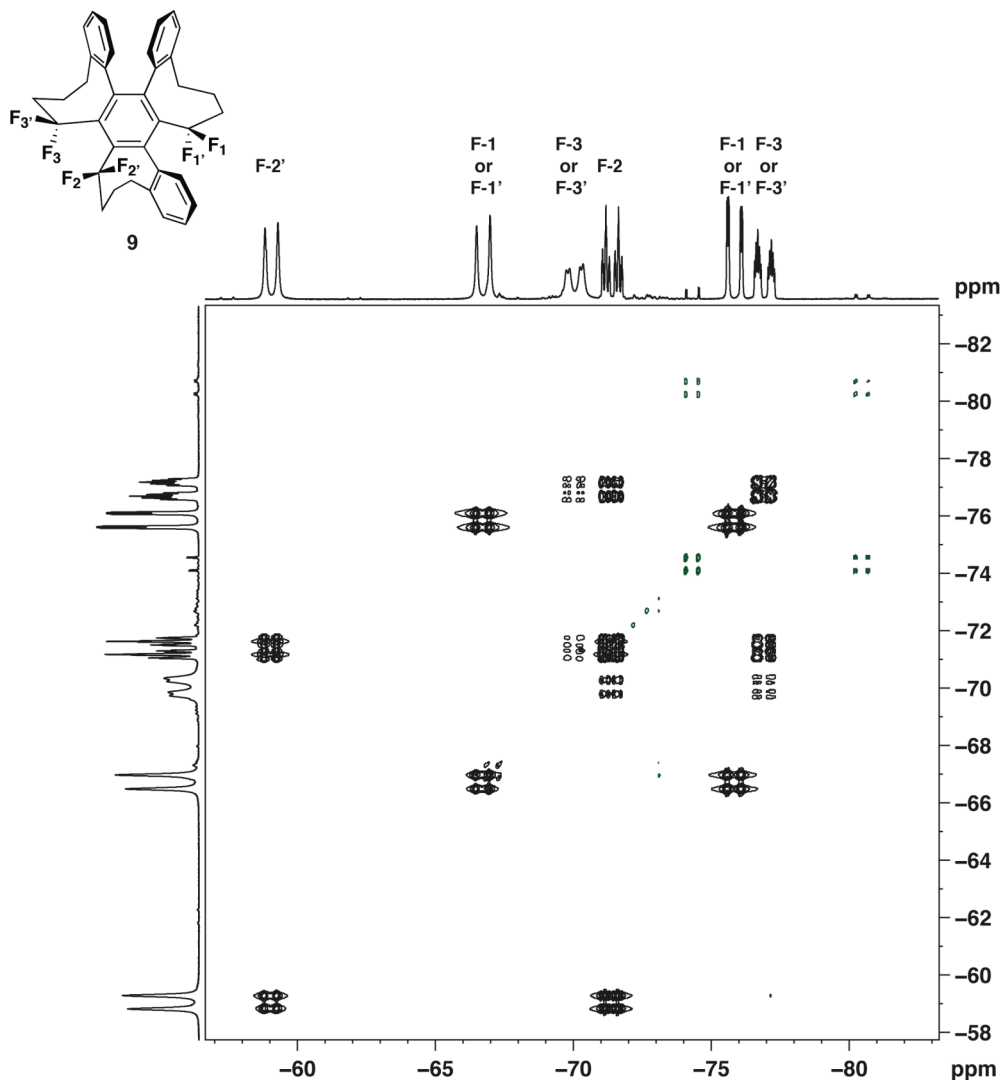

**Figure S1.**  $^{19}\text{F}$ - $^{19}\text{F}$  COSY spectrum of trimer **9** in  $\text{CDCl}_3$ . COSY spectra demonstrate spatial interactions of  $^{19}\text{F}$  because fluorine atoms exhibit significant through space coupling.<sup>2,3</sup> The  $^{19}\text{F}$ -

<sup>2</sup> Ng, S.; Sederholm, C.H. *J. Chem. Phys.* **1964**, *40*, 2090.

<sup>3</sup>  $^{19}\text{F}$ - $^{19}\text{F}$  COSY spectra are known to exhibit  $^4J$  coupling as opposed to the  $^3J$  coupling traditionally observed in  $^1\text{H}$ - $^1\text{H}$  COSY experiment due to the large through space coupling for fluorine atoms. See Buchanan, G.W.; Munteanu, E.; Dawson, B.A.; Hodgson, D. *Magn. Res. Chem.* **2005**, *43*, 528.



<sup>19</sup>F NOESY spectrum of trimer **9** contains the same cross peaks observed in the COSY with decreased signal-to-noise.<sup>4</sup> The green peaks represent an impurity.

**Trimer 10.** Elutes from reverse phase (C-18) HPLC at 31.7 min using CH<sub>3</sub>CN/H<sub>2</sub>O solvent system with a gradient of 50% to 100% CH<sub>3</sub>CN over 25 min followed by 10 min of 100% CH<sub>3</sub>CN. R<sub>f</sub> = 0.55 in 4:1 hexane/EtOAc. <sup>1</sup>H-NMR (500 MHz, CDCl<sub>3</sub>): δ 7.51-7.45 (m, 1H), 7.31 (td, *J* = 7.5, 1.2 Hz, 1H), 7.21 (td, *J* = 7.7, 1.1 Hz, 1H), 7.14 (d, *J* = 7.5 Hz, 1H), 6.96-7.05 (m, 4H), 6.72 (td, *J* = 7.4, 1.4 Hz, 1H), 6.66 (td, *J* = 7.7, 0.9 Hz, 1H), 6.47 (d, *J* = 7.6 Hz, 1H), 6.33 (d, *J* = 7.5 Hz, 1H), 2.67-2.82 (m, 4H), 2.52-2.65 (m, 2H), 2.45-2.51 (m, 1H), 2.33-2.39 (m, 1H), 2.05-2.20 (m, 3H), 1.87-1.98 (m, 2H), 1.76-1.84 (m, 1H), 1.59-1.71 (m, 3H), 1.48-1.58 (m, 1H). <sup>13</sup>C-NMR (125 MHz, CDCl<sub>3</sub>): δ 141.2-141.3 (m), 140.6 (d, *J* = 7 Hz), 140.0 (d, *J* = 4 Hz), 139.7-139.8 (m), 139.5 (d, *J* = 5 Hz), 139.2-139.3 (m), 139.1 (d, *J* = 1 Hz), 138.2 (apparent q, *J* = 22 Hz), 137.1 (apparent t, *J* = 24 Hz), 133.7-133.8 (m), 130.5 (d, *J* = 3 Hz), 129.5, 128.2, 128.03, 127.99, 127.94, 127.2, 127.0, 125.7 (t, *J* = 245 Hz), 125.4, 124.6, 124.3 (apparent d, *J* = 245 Hz), 123.8, 123.3 (t, *J* = 246 Hz), 39.0 (td, *J* = 39, 27 Hz), 38.1 (td, *J* = 27, 11 Hz), 36.0 (t, *J* = 27 Hz), 31.1, 30.7, 30.2, 24.8-24.9 (m), 24.3 (apparent quin, *J* = 3 Hz), 23.6 (apparent q, *J* = 4 Hz). <sup>19</sup>F-NMR (564 Hz, CDCl<sub>3</sub>): δ -62.2 (dt, *J* = 255, 16 Hz, 1F), -67.7 (dd, *J* = 270, 17 Hz, 1F), -69.1 (dd, *J* = 255, 25 Hz, 1F), -71.3 (dd, *J* = 253, 81 Hz, 1F), -72.6- -73.6 (m, 2F). HRMS (EI): Calcd. for C<sub>36</sub>H<sub>30</sub>F<sub>6</sub><sup>+</sup> [M]<sup>+</sup> 576.2252, found 576.2252.

---

<sup>4</sup> Battiste, J.L.; Jing, N.; Newmark, R.A. *J. Fluorine Chem.* **2004**, *125*, 1331.

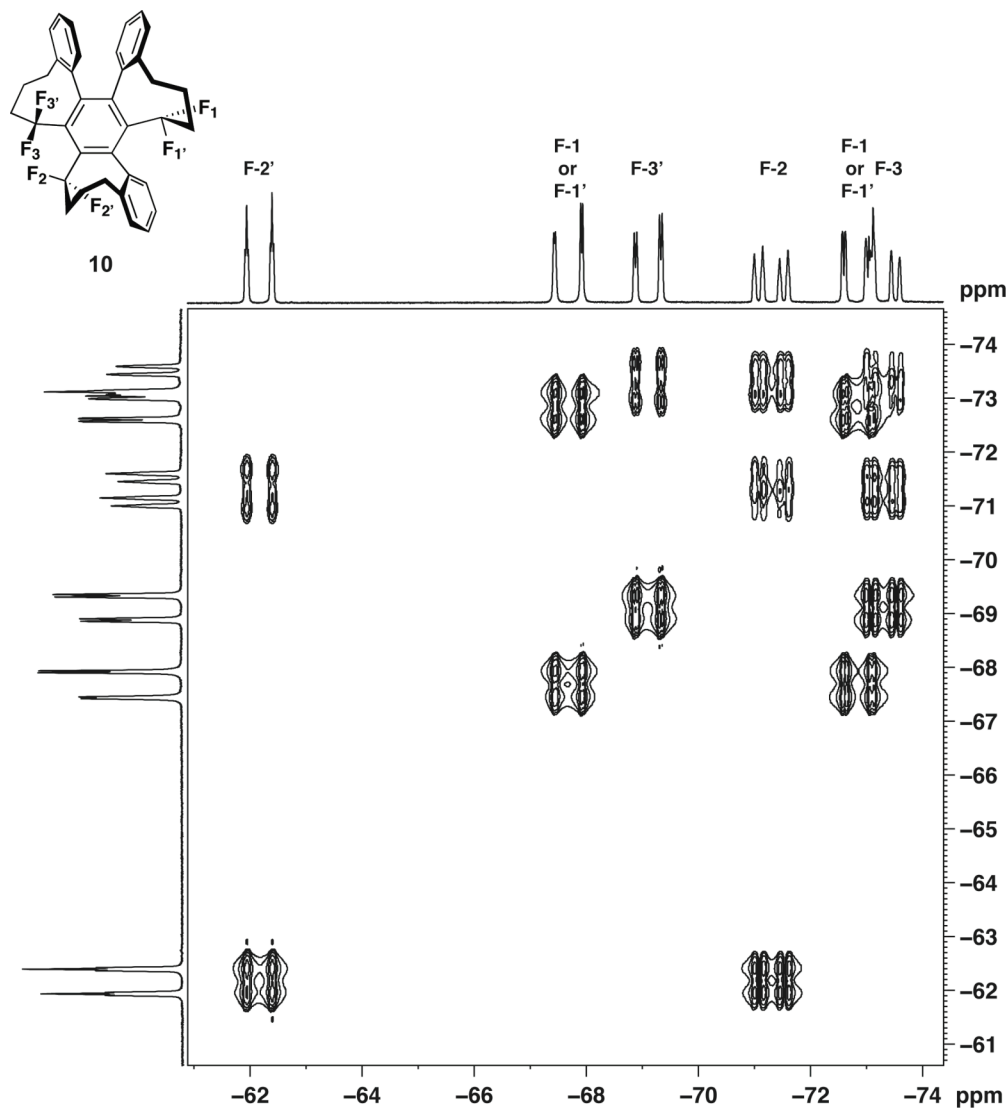

**Figure S2.**  $^{19}\text{F}$ - $^{19}\text{F}$  COSY spectrum of trimer **10** in  $\text{CDCl}_3$ . COSY spectra demonstrate spatial interactions of  $^{19}\text{F}$  because fluorine atoms exhibit significant through space coupling.<sup>5,6</sup> The  $^{19}\text{F}$ - $^{19}\text{F}$  NOESY spectrum of trimer **10** contains the same cross peaks observed in the COSY with decreased signal-to-noise.<sup>7</sup>

<sup>5</sup> Ng, S.; Sederholm, C.H. *J. Chem. Phys.* **1964**, *40*, 2090.

<sup>6</sup>  $^{19}\text{F}$ - $^{19}\text{F}$  COSY spectra are known to exhibit  $^4\text{J}$  coupling as opposed to the  $^3\text{J}$  coupling traditionally observed in  $^1\text{H}$ - $^1\text{H}$  COSY experiment due to the large through space coupling for fluorine atoms. See Buchanan, G.W.; Munteanu, E.; Dawson, B.A.; Hodgson, D. *Magn. Res. Chem.* **2005**, *43*, 528.

<sup>7</sup> Battiste, J.L.; Jing, N.; Newmark, R.A. *J. Fluorine Chem.* **2004**, *125*, 1331.

**Dimer 13.** Elutes from reverse phase (C-18) HPLC at 15.3 min using CH<sub>3</sub>CN/H<sub>2</sub>O solvent system with a gradient of 50% to 100% CH<sub>3</sub>CN over 25 min followed by 10 min of 100% CH<sub>3</sub>CN. R<sub>f</sub> = 0.15 in 4:1 hexane/EtOAc. In solution this compound sits as a mixture of ketal and keto forms in a 3:1 ratio. Minor compound designated as H' (only major product tabulated for <sup>13</sup>C and <sup>19</sup>F NMR). <sup>1</sup>H-NMR (500 MHz, CDCl<sub>3</sub>): δ 8.09 (d, *J* = 7.9 Hz, 1H'), 7.53 (d, *J* = 7.9 Hz, 1H), 7.34 (td, *J* = 7.5, 1.2 Hz, 1H), 7.18-7.28 (m, 4H, 3H'), 7.09-7.11 (m, 2H'), 7.04 (bs, 1H'), 6.94 (d, *J* = 7.4, 1H'), 6.85 (td, *J* = 7.8, 1.0 Hz, 1H), 6.15 (d, *J* = 7.8 Hz, 1H), 4.21 (bs, 1H'), 4.15 (bs, 1H), 4.04 (bs, 1H'), 3.36 (bs, 1H), 2.94-3.01 (m, 2H), 2.86 (apparent dd, *J* = 14.5, 3.5 Hz, 1H), 2.78 (apparent dd, *J* = 13.3, 6.0 Hz, 1H), 2.64-2.67 (m, 1H'), 2.51 (dt, *J* = 14, 3.5 Hz, 1H'), 2.21-2.39 (m, 2H, 5H'), 1.93-2.19 (m, 4H, 1H'), 1.70-1.83 (m, 1H, 3H'), 1.55-1.61 (m, 1H, 1H'). <sup>13</sup>C-NMR (150 MHz, CDCl<sub>3</sub>): δ 146.7 (t, *J* = 8.4 Hz), 141.8, 140.1 (d, *J* = 3 Hz), 135.6, 133.8 (t, *J* = 30 Hz), 131.5, 130.3, 129.9, 128.9, 128.5, 126.9, 126.7, 125.8, 121.6 (dd, *J* = 256, 250 Hz), 120.0 (dd, *J* = 240, 232 Hz), 110.3, 107.0 (dd, *J* = 33, 25 Hz), 36.6 (apparent td, *J* = 25, 6Hz), 34.4, 32.2 (t, *J* = 26 Hz), 30.4, 24.9 (d, *J* = 9 Hz), 23.1 (d, *J* = 11 Hz). <sup>19</sup>F-NMR (564 MHz, CDCl<sub>3</sub>): δ -74.8 (d, *J* = 270 Hz, 1F), -93.6 (d, *J* = 287 Hz, 1F), -99.1 (d, *J* = 259 Hz, 1F), -110.2 (d, *J* = 260 Hz, 1F). HRMS (ESI): Calcd. for C<sub>24</sub>H<sub>22</sub>F<sub>4</sub>O<sub>3</sub>Na<sup>+</sup> [M+Na]<sup>+</sup> 457.1403, found 457.1413.

**Dimer 14.** Elutes from reverse phase (C-18) HPLC at 21.3 min using CH<sub>3</sub>CN/H<sub>2</sub>O solvent system with a gradient of 50% to 100% CH<sub>3</sub>CN over 25 min followed by 10 min of 100% CH<sub>3</sub>CN. R<sub>f</sub> = 0.4 in 4:1 hexane/EtOAc. <sup>1</sup>H-NMR (500 MHz, CDCl<sub>3</sub>): δ 7.90 (dd, *J* = 8.0, 1.4 Hz, 1H), 7.52 (td, *J* = 7.5, 1.5 Hz, 1H), 7.30 (td, *J* = 6.7, 1.2 Hz, 1H), 7.25 (d, *J* = 9.2 Hz, 1H), 3.42 (bs, 2H), 2.33 (bs, 2H), 2.01 (bs, 2H). <sup>13</sup>C-NMR (125 MHz, CDCl<sub>3</sub>): δ 193.3 (d, *J* = 3 Hz), 145.1-145.6 (m), 143.0, 135.6, 134.8, 131.8, 129.9, 127.1, 120.4 (ddd, *J* = 253, 246, 8 Hz), 35.8-36.0 (m), 31.3, 23.3 (t, *J* = 2 Hz). <sup>19</sup>F-NMR (564 MHz, CDCl<sub>3</sub>): δ -86.5 (bs, 2F). HRMS (ESI): Calcd. for C<sub>24</sub>H<sub>20</sub>O<sub>2</sub>F<sub>4</sub>Na<sup>+</sup> [M+Na]<sup>+</sup> 439.1292, found 439.1270.

## Determination of the regiochemistry of triazole isomers **11** and **12**

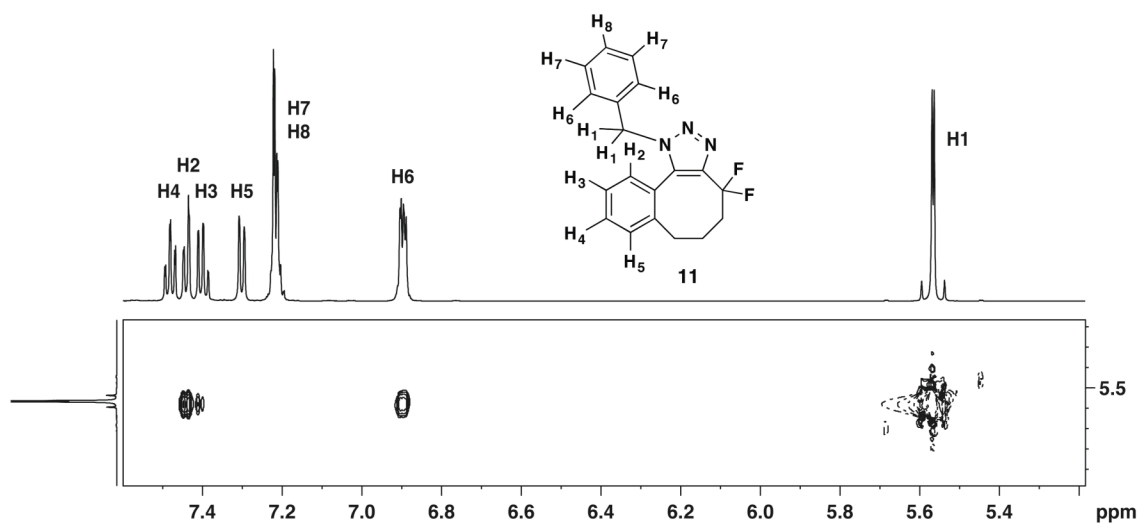

**Figure S3.** Portion of a  $^1\text{H}$ - $^1\text{H}$  NOESY spectrum in  $\text{CD}_3\text{CN}$  of triazole **11** depicting the interactions between benzylic protons H1 and other aryl protons within compound **11**.

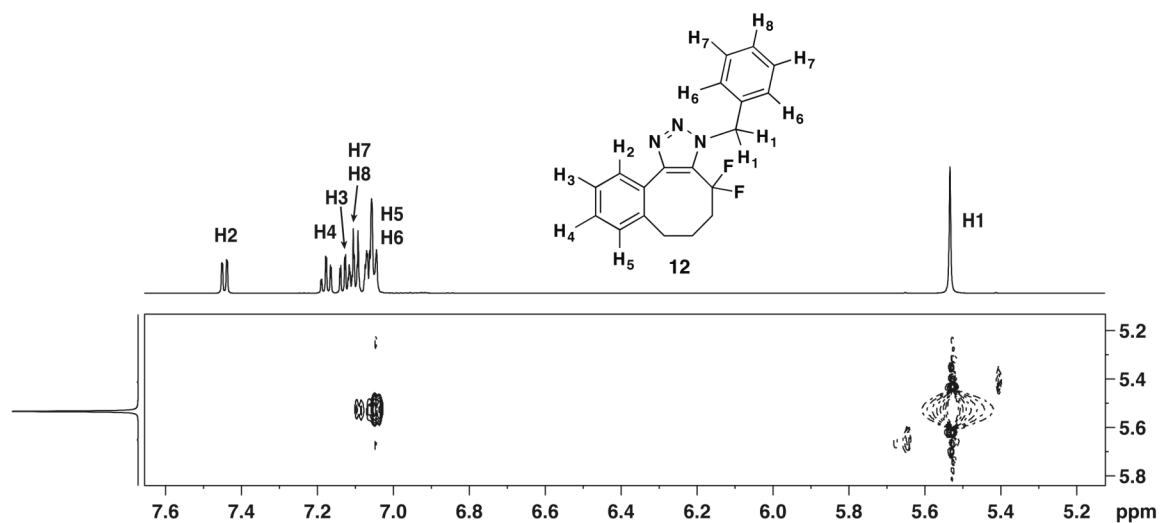

**Figure S4.** Portion of a  $^1\text{H}$ - $^1\text{H}$  NOESY spectrum in  $\text{CD}_3\text{CN}$  of triazole **12** depicting the interactions between benzylic protons H1 and other aryl protons within compound **12**.

## NMR of DIFBO- $\beta$ -cyclodextrin complex

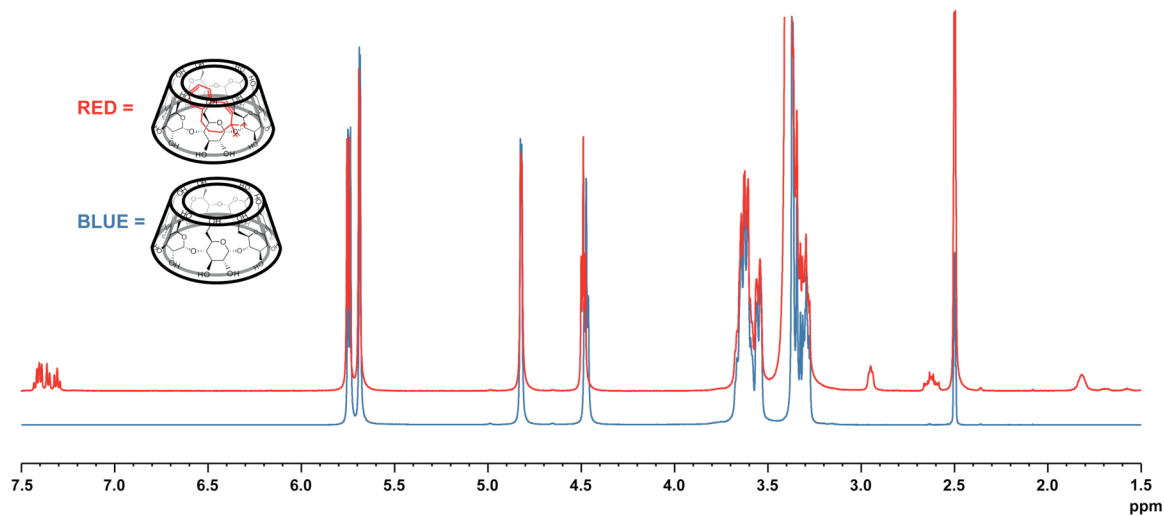

**Figure S5.**  $^1\text{H}$ -NMR spectrum in  $d_6$ -DMSO of the DIFBO- $\beta$ -cyclodextrin complex (red) and of  $\beta$ -cyclodextrin alone (blue). The lack of change in chemical shift of the  $\beta$ -cyclodextrin  $^1\text{H}$  resonances indicates that the complex is not intact in DMSO.

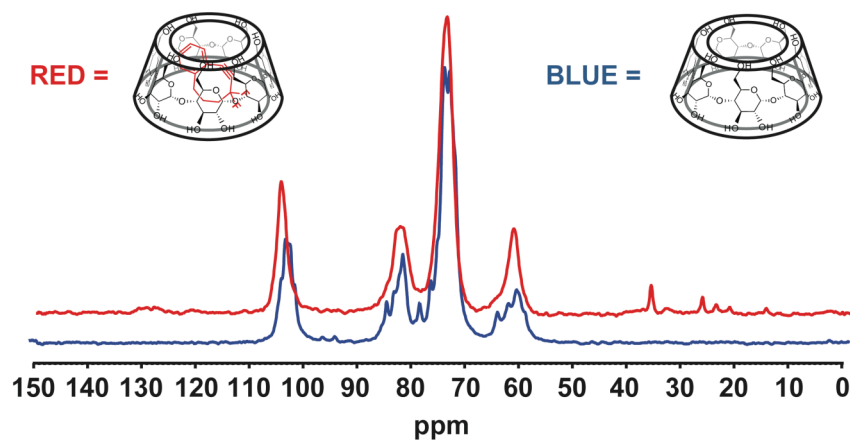

**Figure S6.** CPMAS  $^{13}\text{C}$ -NMR of the  $\beta$ -cyclodextrin-DIFBO complex (red) compared to  $\beta$ -cyclodextrin alone (blue).

## HPLC traces of synthetic standards

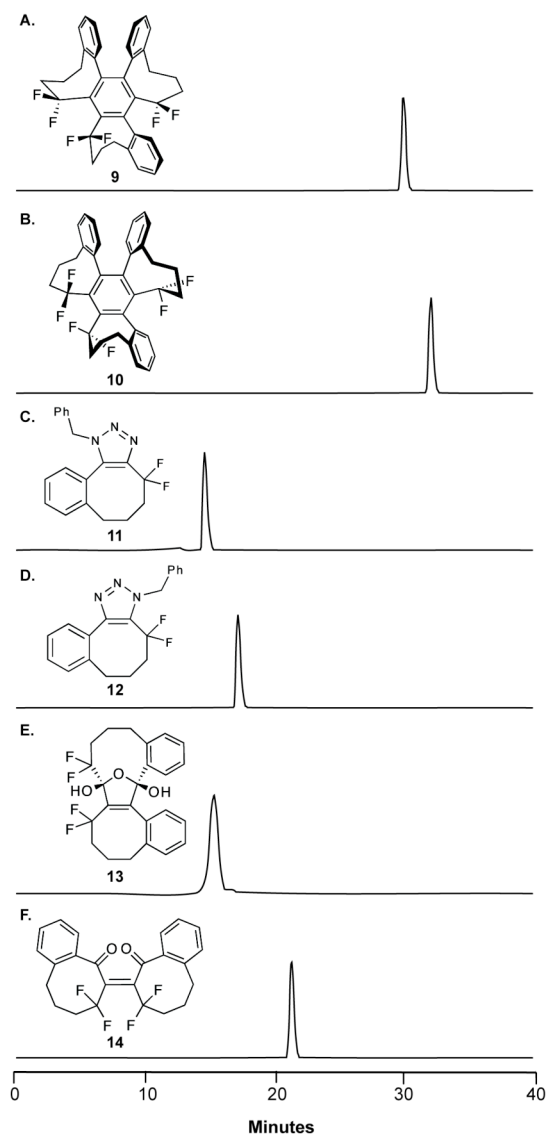

**Figure S7.** HPLC traces generated by monitoring the absorbance at 254 nm over time of compounds **9-14** (A-F, respectively). All traces were generated on a C-18 column using a H<sub>2</sub>O/CH<sub>3</sub>CN solvent system with a gradient of 50-100% CH<sub>3</sub>CN over 25 min followed by 100% CH<sub>3</sub>CN for 10 min before re-equilibration to 50% CH<sub>3</sub>CN.

## Degradation assay for DIFBO- $\beta$ -cyclodextrin complex

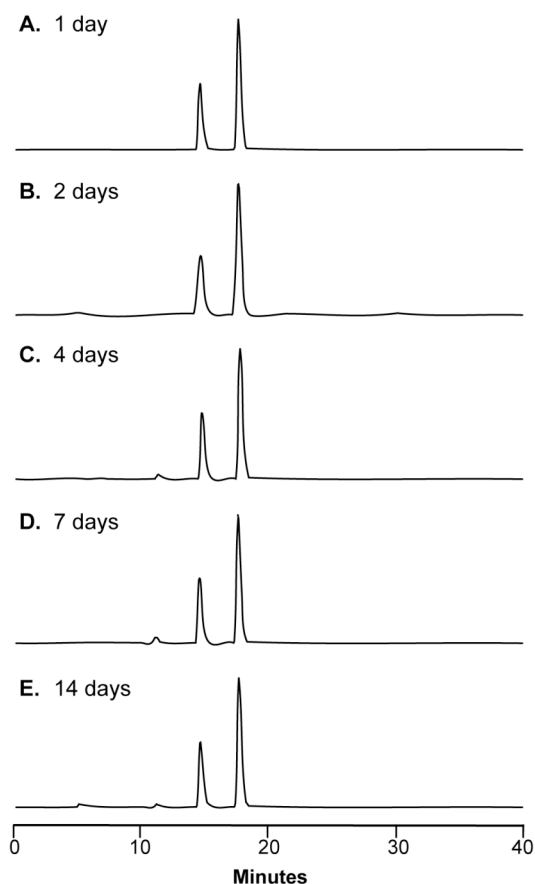

**Figure S8.** HPLC traces of 150 nmol of DIFBO- $\beta$ -cyclodextrin complex dissolved in 1:1 CH<sub>3</sub>CN/H<sub>2</sub>O and reacted with benzyl azide A) 1 day, B) 2 days, C) 4 days, D) 7 days, or E) 14 days after encapsulation of DIFBO in cyclodextrin. Shown are the traces generated by monitoring the absorbance at 254 nm over time. The compounds were eluted from a C-18 column using a H<sub>2</sub>O/CH<sub>3</sub>CN solvent system with a gradient of 50-100% CH<sub>3</sub>CN over 25 min followed by 100% CH<sub>3</sub>CN for 10 min before re-equilibration to 50% CH<sub>3</sub>CN.

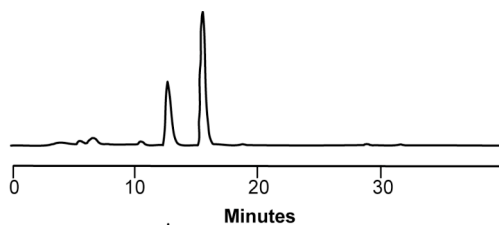

**Figure S9.** HPLC trace of 150 nmol of DIFBO- $\beta$ -cyclodextrin complex dissolved in 1:1 CH<sub>3</sub>CN/H<sub>2</sub>O and reacted with benzyl azide two months after encapsulation of DIFBO in cyclodextrin. Shown is the trace generated by monitoring the absorbance at 254 nm over time. The compounds were eluted from a C-18 column using a H<sub>2</sub>O/CH<sub>3</sub>CN solvent system with a gradient of 50-100% CH<sub>3</sub>CN over 25 min followed by 100% CH<sub>3</sub>CN for 10 min before re-equilibration to 50% CH<sub>3</sub>CN. The slight difference in retention time of the two triazole peaks as compared to Figure S8 is attributed to a different HPLC column.

## Synthesis of monobenzocyclooctyne **16** (MOBO)

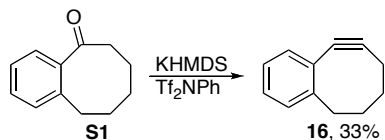

**Scheme S1.** Synthesis of monobenzocyclooctyne (MOBO).

**Monobenzocyclooctyne (16).** Known 7,8,9,10-tetrahydrobenzo[8]anulen-5(6*H*)-one (**S1**)<sup>8</sup> (100 mg, 0.57 mmol, 1 equiv) was dissolved in THF (3 mL) and cooled to -78 °C. To this solution, potassium bis(trimethylsilyl)amide (0.5 M solution in toluene, 2.28 mL, 1.14 mmol, 2 equiv) was added and the mixture was stirred at -78 °C. After 1 hr, *N*-phenyl-bis(trifluoromethanesulfonylimide) (234 mg, 0.66 mmol, 1.1 equiv in 5 mL THF) was added. The reaction mixture was allowed to warm to 0 °C. After 1 hr at 0 °C, the reaction was quenched with MeOH and evaporated to dryness to result in crude monobenzocyclooctyne. Silica gel chromatography eluting with hexane yielded monobenzocyclooctyne **16** as a volatile, foul smelling oil. (30 mg, 0.19 mmol, 33%). *R*<sub>f</sub> = 0.85 in 4:1 hexane/EtOAc. <sup>1</sup>H-NMR (600 MHz, CDCl<sub>3</sub>): δ 7.14-7.20 (m, 4H), 2.80 (bs, 2H), 2.58 (t, *J* = 6.8 Hz, 2H), 2.13 (bs, 2H), 1.76 (bs, 2H). <sup>13</sup>C-NMR (150 MHz, CDCl<sub>3</sub>): δ 151.6, 128.9, 127.1, 126.1, 125.8, 124.3, 112.8, 93.8, 39.2, 33.8, 25.7, 20.5. HRMS (EI): Calcd. for C<sub>12</sub>H<sub>12</sub><sup>+</sup> [M]<sup>+</sup> 156.0939, found 156.0940.

<sup>8</sup> Huisgen, R.; Rapp, W. *Chem. Ber.* **1952**, *85*, 826.



## Determination of second-order rate constants

**DIFBO (4).** DIFBO- $\beta$ -cyclodextrin complex (~200 mg) was dissolved in  $\text{CD}_3\text{CN}$  (~4 mL) and the  $\beta$ -cyclodextrin was removed by filtration. The white solid was washed with  $\text{CD}_3\text{CN}$  (~1.5 mL). The resulting eluent was transferred to NMR tubes (600  $\mu\text{L}$  each). A 59 mM solution of  $\text{BnN}_3$  in  $\text{CD}_3\text{CN}$  was prepared. To the first NMR tube containing DIFBO, an approximate amount of  $\text{BnN}_3$  solution was added. Using integration, the amount of  $\text{BnN}_3$  necessary for an exact 1:1 mixture of  $\text{BnN}_3$ :DIFBO to be obtained was calculated. This amount (90-100  $\mu\text{L}$ ) was added to the remaining DIFBO solutions and each reaction was monitored by  $^1\text{H}$ -NMR over 15 min. The concentration of each sample was determined relative to the amount of  $\text{BnN}_3$  added. A plot of  $1/[\text{DIFBO}]$  ( $\text{M}^{-1}$ ) vs. time (s) resulted in a linear regression (Figure S10) whose slope was the second-order rate constant. This procedure was repeated four times with a concentration of 7-8 mM, to yield a second-order rate constant of  $0.22 \pm 0.01 \text{ M}^{-1}\text{s}^{-1}$ .

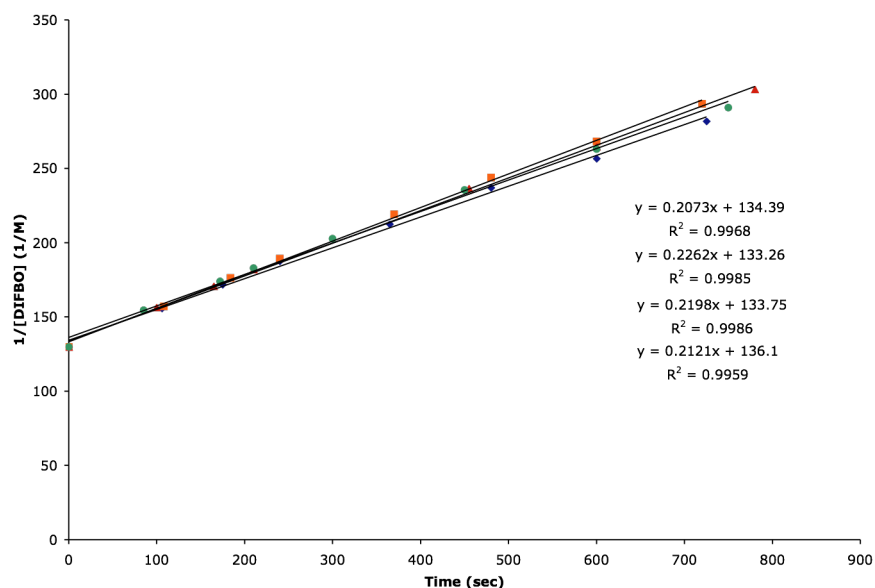

**Figure S10.** Plot of  $1/[\text{DIFBO}]$  vs. time for the reaction of DIFBO and  $\text{BnN}_3$  in  $\text{CD}_3\text{CN}$  as monitored by  $^1\text{H}$ -NMR.

**MOBO (16).** A solution of monobenzocyclooctyne (24 mM) in CD<sub>3</sub>CN with a small amount of hexamethyldisilane was prepared. A solution of BnN<sub>3</sub> (146 mM) was also prepared using the same solution of CD<sub>3</sub>CN containing a small amount of hexamethyldisilane. <sup>1</sup>H-NMR spectra of each of these solutions were obtained, and using the ratio of BnN<sub>3</sub> or MOBO to hexamethyldisilane the appropriate amount of each solution necessary for a 1:1 mixture of BnN<sub>3</sub>:MOBO was calculated. The correct amount of BnN<sub>3</sub> was added to MOBO and the reaction was monitored by <sup>1</sup>H-NMR over 45 min. The concentration of each sample was determined based on the concentration of the initial monobenzocyclooctyne solution. A plot of 1/[MOBO] (M<sup>-1</sup>) vs. time (s) resulted in a linear regression whose slope was the second-order rate constant (Figure S11). This procedure was repeated three times with a concentration of 19 mM to yield a second-order rate constant of 0.0095 ± 0.0003 M<sup>-1</sup>s<sup>-1</sup>.

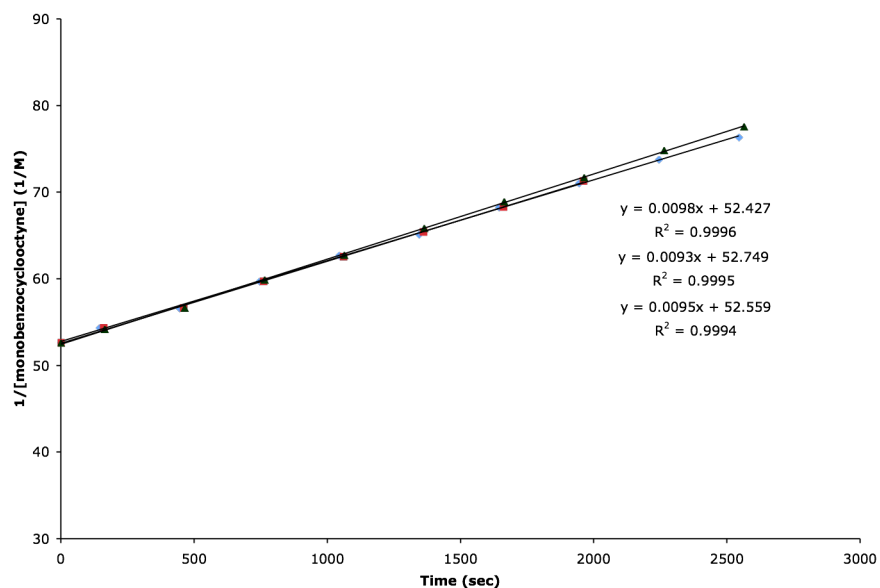

**Figure S11.** Plot of 1/[MOBO] vs. time for the reaction of **16** and BnN<sub>3</sub> in CD<sub>3</sub>CN as monitored by <sup>1</sup>H-NMR.

## Analogues of DIFBO

In order for DIFBO to be useful for reactions with azides in a biological setting, it has to have a substantially longer half-life. Physical organic chemists have spent considerable effort synthesizing highly strained molecules that are able to persist due to kinetic stability.<sup>9</sup> Considering the main degradation product of DIFBO was a trimer, we envisioned that steric protection of the alkyne through an appropriately placed methyl group on the aryl ring (compound **S2**) or the addition of methyl groups at the propargylic position (compounds **S3** and **S4**) would result in a more kinetically stable cyclooctyne. Additionally, we looked to stabilize DIFBO by raising the LUMO levels (compounds **S3** and **S4**) or by decreasing the ring strain (cyclononyne **S5**). We hoped that these cycloalkynes (**S2-S5**) would remain sufficiently reactive with azides, even though they are less activated for 1,3-dipolar cycloaddition. We envisioned cycloalkynes **S2-S5** could be synthesized from ketones **19-22** through the same homologation strategy used for DIFBO.

Benzosuberones **19-21** and ketone **22** were synthesized by standard procedures (see Schemes S2-S5). Unfortunately, when these ketones were subjected to trimethyl aluminum and trimethylsilyl diazomethane, no ring expansion was observed. Other attempts at homologation using an array of Lewis acids and diazo species failed to produce any desired product.<sup>10</sup> Thus, while the homologation approach to DIFBO was highly efficient, it does not appear to be a generalizable method for cycloalkyne synthesis.

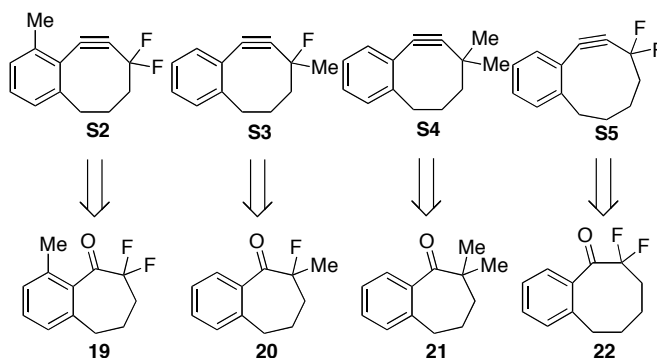

**Scheme S2.** Analogues of DIFBO and their potential ketone precursors.

<sup>9</sup> a) Liebman, J.F.; Greenberg, A. *Chem. Rev.* **1976**, *76*, 311. b) Maier, G. *Angew. Chem. Int. Ed.* **1988**, *27*, 309. c) Tsuji, T.; Ohkita, M.; Kawai, H. *Bull. Chem. Soc. Jpn.* **2002**, *75*, 415. d) Tokitoh, N. *Bull. Chem. Soc. Jpn.* **2004**, *77*, 429.

<sup>10</sup> A selection of other conditions involved varying the Lewis acid (TMSOTf, BF<sub>3</sub> OEt<sub>2</sub>, Sc(OTf)<sub>3</sub>, MAD, AlCl<sub>3</sub>), diazo species (CH<sub>2</sub>N<sub>2</sub>, TMSCLiN<sub>2</sub>, N<sub>2</sub>CCOOEt), and temperature (including microwave radiation). Cyclononyne **S5** could unreliably be formed via treatment of **22** with TMSCLiN<sub>2</sub>. (Similar conditions to those reported in Miwa, K.; Aoyama, T.; Shioiri, T. *Synlett*, **1994**, *2*, 107.) The small amount of **S5** isolated appeared to react very slowly with azides ( $k \sim 10^{-5} \text{ M}^{-1}\text{s}^{-1}$ ).

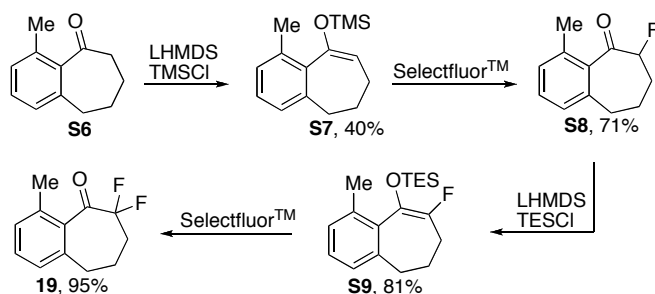

**Scheme S3.** Synthesis of 2,2-difluoro-9-methyl-1-benzosuberone **19**.

**9-Methyl-1-benzosuberone (S6).** 9-Methyl-1-benzosuberone (**S6**) was prepared as described by R. McCague.<sup>11</sup> Briefly, TMS-enol ether of benzosuberone (2.55 g, 11 mmol, 1 equiv) was dissolved in hexanes (32 mL, dried over molecular sieves overnight). To this solution, tetramethylethylenediamine (4.0 mL, 27 mmol, 2.5 equiv, freshly distilled) was added followed by nBuLi (1.42 M solution in hexanes, 16.0 mL, 23.0 mmol, 2.1 equiv). The resulting orange mixture was heated to reflux. After 2 hr, MeI (0.87 mL, 14 mmol, 1.3 equiv) in hexanes (5.1 mL) was added and the reaction was immediately quenched with H<sub>2</sub>O (25 mL). Upon cooling to rt, the product was extracted into hexane (3 x 50 mL). The organics were combined, dried with MgSO<sub>4</sub>, decanted and evaporated to dryness. The crude product was purified by silica gel chromatography in a hexane/ether solvent system (40:1 to 30:1). This procedure yielded desired product **S6** (980 mg, 5.6 mmol, 51%) plus some recovered benzosuberone and 2,9-dimethyl benzosuberone. R<sub>f</sub> = 0.5 in 5:1 hexanes/EtOAc. <sup>1</sup>H-NMR (500 MHz, CDCl<sub>3</sub>): δ 7.14 (d, *J* = 7.6 Hz, 1H), 7.02 (d, *J* = 7.6 Hz, 1H), 6.90 (d, *J* = 7.5 Hz, 1H), 2.69 (t, *J* = 6.6 Hz, 2H), 2.53-2.55 (m, 2H), 2.27 (s, 3H), 1.67-1.76 (m, 4H). <sup>13</sup>C-NMR (125 MHz, CDCl<sub>3</sub>): δ 210.3, 139.5, 138.0, 135.3, 129.9, 129.0, 126.3, 42.0, 32.3, 25.5, 22.3, 19.7. HRMS (ESI): Calcd. for C<sub>12</sub>H<sub>15</sub>O<sup>+</sup> [M+H]<sup>+</sup> 175.1117, found 175.1115.

**Compound S7.** 9-Methyl-1-benzosuberone (**S6**, 440 mg, 2.5 mmol, 1 equiv) was dissolved in THF (44 mL) and cooled to -78 °C. Lithium bis(trimethylsilyl)amide (1 M solution in THF, 4.7 mL, 4.7 mmol, 1.9 equiv) was added and the resulting mixture was stirred at -78 °C. After 1.5 hr, TMSCl (1.07 mL, 8.4 mmol, 3.4 equiv) was added and the reaction was warmed to 0 °C. Upon reaching 0 °C, the reaction was quenched with MeOH and evaporated to dryness. The crude product was purified by silica gel chromatography eluting with hexane to yield **S7** (255 mg, 1.0 mmol, 40%). R<sub>f</sub> = 0.9 in 4:1 hexane/EtOAc. <sup>1</sup>H-NMR (600 MHz, CDCl<sub>3</sub>): δ 7.13 (t, *J* = 7.5 Hz, 1H), 7.08 (d, *J* = 7.3 Hz, 1H), 7.03 (d, *J* = 7.5 Hz, 1H), 5.45 (t, *J* = 7.7 Hz, 1H), 2.62 (t, *J* = 7.0 Hz, 2H), 2.39 (s, 3H), 1.98 (apparent quin, *J* = 7.0 Hz, 2H), 1.73 (bs, 2H), 0.17 (s, 9H). <sup>13</sup>C-NMR (150 MHz, CDCl<sub>3</sub>): 150.3, 140.6, 137.2, 136.7, 128.8, 127.7, 126.2, 108.4, 34.0, 32.7, 22.1, 21.0, 0.3. HRMS (EI): Calcd. for C<sub>15</sub>H<sub>22</sub>OSi<sup>+</sup> [M]<sup>+</sup> 246.1440, found 246.1440.

**2-Fluoro-9-methyl-1-benzosuberone (S8).** Selectfluor™ (475 mg, 1.3 mmol, 1.3 equiv) was dissolved in DMF (25 mL) and cooled to 0 °C. Compound **S7** (255 mg, 1.0 mmol, 1 equiv) was dissolved in DMF (12 mL) and this solution was added to the Selectfluor™ solution over 30 min at 0 °C. After addition of **S7** was complete, the reaction mixture was warmed to rt and stirred for an additional 1.5 hr. The reaction was then quenched with H<sub>2</sub>O (25 mL) and extracted with Et<sub>2</sub>O

<sup>11</sup> McCague, R. *Tetrahedron: Asymmetry* **1990**, *1*, 97.

(2 x 50 mL). The Et<sub>2</sub>O extracts were combined, dried with MgSO<sub>4</sub>, decanted and evaporated to dryness. The crude product was purified by silica gel chromatography eluting with 40:1 hexanes/ether. This procedure resulted in 142 mg of pure **S8** (0.74 mmol, 71%). R<sub>f</sub> = 0.7 in 3:1 hexanes/EtOAc. <sup>1</sup>H-NMR (600 MHz, CDCl<sub>3</sub>): δ 7.17 (t, *J* = 7.7 Hz, 1H), 7.07 (d, *J* = 7.6 Hz, 1H), 6.96 (d, *J* = 7.5 Hz, 1H), 5.07 (ddd, *J<sub>F</sub>* = 50.5 Hz, portion at 5.11 apparent t, *J* = 5.8 Hz, portion at 5.03 dd, *J* = 7.6, 4.1 Hz, 1H), 2.74-2.76 (m, 2H), 2.26 (s, 3H), 2.13-2.17 (m, 2H), 1.99-2.05 (m, 1H), 1.78-1.84 (m, 1H). <sup>13</sup>C-NMR (150 MHz, CDCl<sub>3</sub>): δ 206.3 (d, *J* = 24 Hz), 138.1, 137.9, 135.9, 130.2, 129.0, 127.0, 94.9 (d, *J* = 183 Hz), 35.2, 33.7 (d, *J* = 22 Hz), 23.2 (d, *J* = 6 Hz), 19.6. <sup>19</sup>F-NMR (564 MHz, CDCl<sub>3</sub>): δ -101.2 (t, *J* = 11 Hz, 1F). HRMS (EI): Calcd. for C<sub>12</sub>H<sub>13</sub>OF<sup>+</sup> [M]<sup>+</sup> 192.0950, found 192.0954.

**Compound S9.** 2-Fluoro-9-methyl-1-benzosuberone (**S8**, 114 mg, 0.59 mmol, 1 equiv) was dissolved in THF (10 mL) and cooled to -78 °C. Lithium bis(trimethylsilyl)amide (1M solution in THF, 1.1 mL, 1.1 mmol, 1.9 equiv) was added. The reaction mixture was stirred for 30 min at -78 °C at which point TESC1 (0.33 mL, 2.0 mmol, 3.4 equiv) was added. The reaction was warmed to rt. After 10 min at rt, the reaction was quenched with MeOH, evaporated to dryness, and chromatographed on silica gel eluting with hexane/EtOAc (20:1). This procedure resulted in pure **S9** (147 mg, 0.48 mmol, 81%). R<sub>f</sub> = 0.95 in 3:1 hexane/EtOAc. <sup>1</sup>H-NMR (500 MHz, CDCl<sub>3</sub>): δ 7.10 (apparent t, *J* = 7.4 Hz, 1H), 7.05 (d, *J* = 7.2 Hz, 1H), 6.98 (d, *J* = 7.4 Hz, 1H), 2.65 (bs, 2H), 2.39 (s, 3H), 2.07-2.15 (bm, 4H), 0.89 (t, *J* = 7.9 Hz, 9H), 0.60 (q, *J* = 7.9 Hz, 6H). <sup>13</sup>C-NMR (125 MHz, CDCl<sub>3</sub>): δ 148.8 (d, *J* = 255 Hz), 139.9, 138.2 (d, *J* = 4 Hz), 135.5 (d, *J* = 4 Hz), 129.8 (d, *J* = 14 Hz), 129.1, 127.8, 126.4, 33.4, 32.5, 25.3 (d, *J* = 25 Hz), 21.0, 5.3, 5.2. <sup>19</sup>F-NMR (564 MHz, CDCl<sub>3</sub>): δ -126.1 (t, *J* = 23 Hz, 1F). HRMS (EI): Calcd. for C<sub>18</sub>H<sub>27</sub>FOSi<sup>+</sup> [M]<sup>+</sup> 306.1815, found.

**2,2-Difluoro-9-methyl-1-benzosuberone (19).** Selectfluor<sup>TM</sup> (121 mg, 0.34 mmol, 1.6 equiv) was dissolved in DMF (6 mL). Compound **S9** (64 mg, 0.21 mmol, 1 equiv) was dissolved in DMF (3 mL) and this solution was added to the Selectfluor<sup>TM</sup> solution over 30 min. After addition of **S9** was complete, the reaction was stirred for an additional 30 min, at which point H<sub>2</sub>O (5 mL) was added and the product was extracted with Et<sub>2</sub>O (2 x 15 mL). The Et<sub>2</sub>O extracts were combined, dried with MgSO<sub>4</sub>, decanted and evaporated to dryness. The crude product was purified by silica gel chromatography (hexanes/EtOAc). This procedure resulted in 42 mg of pure **19** (0.20 mmol, 95%). R<sub>f</sub> = 0.7 in 3:1 hexane/EtOAc. <sup>1</sup>H-NMR (500 MHz, CDCl<sub>3</sub>): δ 7.25 (t, *J* = 7.6 Hz, 1H), 7.13 (d, *J* = 7.7 Hz, 1H), 7.00 (d, *J* = 7.7 Hz, 1H), 2.79-2.81 (m, 2H), 2.30 (s, 3H), 2.26-2.33 (m, 2H), 1.94-1.98 (m, 2H). <sup>13</sup>C-NMR (125 MHz, CDCl<sub>3</sub>): δ 198.5 (t, *J* = 30 Hz), 138.2, 137.0, 136.2, 131.0 (apparent d, *J* = 12 Hz), 129.3 (apparent d, *J* = 19 Hz), 127.1 (apparent d, *J* = 18 Hz), 118.1 (t, *J* = 250 Hz), 35.8 (t, *J* = 24 Hz), 34.3, 22.5 (bs), 19.7. <sup>19</sup>F-NMR (564 MHz, CDCl<sub>3</sub>): δ -106.0 (apparent t, *J* = 11 Hz, 2F). HRMS (EI): Calcd. for C<sub>12</sub>H<sub>12</sub>OF<sub>2</sub> 210.0856, found 210.0860.

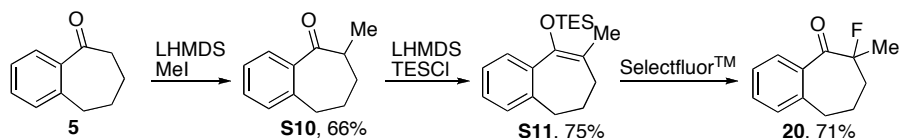

**Scheme S4.** Synthesis of 2-fluoro-2-methyl-1-benzosuberone **20**.

**2-Methyl-1-benzosuberone (S10).** Lithium bis(trimethylsilyl)amide (1M solution in THF, 0.80 mL, 0.80 mmol, 1.2 equiv) and THF were cooled to  $-78\text{ }^{\circ}\text{C}$ . To this solution, benzosuberone (**5**, 100  $\mu\text{L}$ , 0.68 mmol, 1 equiv) was added dropwise. This solution was stirred for 1.5 hr at which point MeI (210  $\mu\text{L}$ , 3.4 mmol, 5 equiv) was added. The reaction was warmed to rt over 4 hr and then quenched with MeOH. The mixture was evaporated to dryness and the crude oil was purified by silica gel chromatography (35:1 hexane/EtOAc). This procedure yielded **S10** as a clear oil (79 mg, 0.45 mmol, 66%).  $R_f = 0.6$  in 9:1 hexane/EtOAc.  $^1\text{H-NMR}$  (600 MHz,  $\text{CDCl}_3$ ):  $\delta$  7.44 (d,  $J = 7.7$  Hz, 1H), 7.35 (t,  $J = 7.1$  Hz, 1H), 7.25 (t,  $J = 7.6$  Hz, 1H), 7.19 (d,  $J = 7.3$  Hz, 1H), 2.88-3.01 (m, 3H), 2.03-2.06 (m, 1H), 1.84-1.91 (m, 1H), 1.64-1.68 (m, 2H), 1.21 (d,  $J = 6.5$  Hz, 3H).  $^{13}\text{C-NMR}$  (150 MHz,  $\text{CDCl}_3$ ):  $\delta$  207.9, 142.0, 139.8, 131.4, 129.9, 128.5, 126.5, 44.3, 33.8, 32.1, 25.7, 16.6. HRMS (EI): Calcd. for  $\text{C}_{12}\text{H}_{14}\text{O}^+ [\text{M}]^+$  174.1045, found 174.1042.

**Compound S11.** 2-Methyl-1-benzosuberone (**S10**, 318 mg, 1.8 mmol, 1 equiv) was dissolved in THF (31 mL) and cooled to  $-78\text{ }^{\circ}\text{C}$ . Lithium bis(trimethylsilyl)amide (1M solution in THF, 2.0 mL, 2.0 mmol, 1.1 equiv) was added to this solution. After 1 hr, TESCl (490  $\mu\text{L}$ , 2.9 mmol, 1.6 equiv) was added and the reaction mixture was warmed to rt overnight. The following morning the reaction was quenched with water (1 mL) and evaporated to dryness. The crude product was extracted with  $\text{Et}_2\text{O}$  (3 x 10 mL, 15 mL  $\text{H}_2\text{O}$ ). The organic extracts were combined, dried with  $\text{MgSO}_4$ , decanted, and evaporated to dryness. The product was purified by silica gel chromatography with hexane/EtOAc (100% hexane to 100:1 hexane/EtOAc) to yield 394 mg of silyl enol ether **S11**. (1.4 mmol, 75%).  $R_f = 0.9$  in 9:1 hexane/ethyl acetate.  $^1\text{H-NMR}$  (500 MHz,  $\text{CDCl}_3$ ):  $\delta$  7.46 (d,  $J = 8.0$  Hz, 1H), 7.23-7.28 (m, 1H), 7.17-7.21 (m, 2H), 2.62 (t,  $J = 7.1$  Hz, 2H), 2.13 (apparent quin,  $J = 7.2$  Hz, 2H), 1.96 (s, 3H), 1.84 (t,  $J = 7.1$  Hz, 2H), 0.94 (t,  $J = 7.9$  Hz, 9H), 0.57 (q,  $J = 8.0$  Hz, 6H).  $^{13}\text{C-NMR}$  (150 MHz,  $\text{CDCl}_3$ ):  $\delta$  143.2, 140.2, 140.1, 128.6, 127.1, 126.9, 125.8, 117.3, 33.8, 32.7, 30.0, 17.8, 6.9, 5.4. HRMS (EI): Calcd. for  $\text{C}_{18}\text{H}_{28}\text{OSi}^+ [\text{M}]^+$  288.1909, found 288.1913.

**2-Fluoro-2-methyl-1-benzosuberone (20).** Selectfluor<sup>TM</sup> (533 mg, 1.5 mmol, 1.5 equiv) was dissolved in DMF (20 mL) and cooled to  $0\text{ }^{\circ}\text{C}$ . Compound **S11** (294 mg, 1.0 mmol, 1 equiv) was dissolved in DMF (15 mL) and this solution was added to the Selectfluor<sup>TM</sup> solution over 30 min. After addition of **S11**, the reaction mixture was warmed to rt and stirred for an additional 30 min. The reaction was then quenched with  $\text{H}_2\text{O}$  (20 mL) and extracted with  $\text{Et}_2\text{O}$  (2 x 40 mL). The  $\text{Et}_2\text{O}$  extracts were combined, dried with  $\text{MgSO}_4$ , decanted and evaporated to dryness. The crude product was purified by silica gel chromatography eluting with 15:1 hexanes/EtOAc. This procedure resulted in 139 mg of pure **20** (0.72 mmol, 71%).  $R_f = 0.4$  in 9:1 hexanes/EtOAc.  $^1\text{H-NMR}$  (600 MHz,  $\text{CDCl}_3$ ):  $\delta$  7.52 (dd,  $J = 7.6, 1.1$  Hz, 1H), 7.40 (td,  $J = 7.5, 1.3$  Hz, 1H), 7.30 (t,  $J = 7.4$  Hz, 1H), 7.21 (d,  $J = 7.6$  Hz, 1H), 3.14 (dd,  $J = 15.9, 10.7$  Hz, 1H), 2.91 (dd,  $J = 16.1, 8.3$  Hz, 1H), 2.20-2.28 (m, 1H), 2.10-2.16 (m, 1H), 2.04 (dtd,  $J = 32.2, 14.5, 5.1$  Hz, 1H), 1.78-1.85 (m, 1H), 1.59 (d,  $J = 21.6$  Hz, 3H).  $^{13}\text{C-NMR}$  (150 MHz,  $\text{CDCl}_3$ ):  $\delta$  204.6 (d,  $J = 29$  Hz), 141.1, 137.7, 131.5, 129.7, 128.9, 126.5, 100.8 (d,  $J = 178$  Hz), 38.3 ( $J = 23$  Hz), 34.5, 24.1 ( $J =$

2 Hz), 23.5 (d,  $J = 24$  Hz).  $^{19}\text{F}$ -NMR (564 MHz,  $\text{CDCl}_3$ ):  $\delta$  -144.9- -144.6 (m, 1F). HRMS (EI): Calcd. for  $\text{C}_{12}\text{H}_{13}\text{OF}^+$   $[\text{M}]^+$  192.0950, found 192.0952.

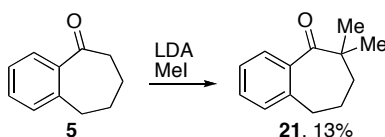

**Scheme S5.** Synthesis of 2,2-dimethyl-1-benzosuberone (**21**).

**2,2-Dimethyl-1-benzosuberone (21).** A 0.5 M solution of LDA was prepared (2.5 ml 1.4 M nBuLi, 4.0 mL THF, 0.70 mL diisopropylamine combined at  $-78$  °C and let stir for 30 min) and benzosuberone (**5**, 0.50 mL, 3.4 mmol, 1 equiv) was added. After this mixture was stirred for 1 hr at  $-78$  °C, MeI (0.60 mL, 9.6 mmol, 2.8 equiv) was added. The resulting yellow solution was warmed to rt overnight. The following day the reaction mixture was quenched with aqueous sat.  $\text{NH}_4\text{Cl}$  (7 mL) and the product was extracted into  $\text{CH}_2\text{Cl}_2$  (3 x 10 mL). The organics were combined, dried with  $\text{MgSO}_4$ , decanted and evaporated to dryness. The crude mixture was purified by silica gel chromatography, eluting with 20:1 hexane/EtOAc to yield **21** (80 mg, 0.43 mmol, 13%) as well as a mixture of mono- and dimethylated benzosuberones.  $R_f = 0.6$  in 9:1 hexane/EtOAc.  $^1\text{H}$ -NMR (400 MHz,  $\text{CDCl}_3$ ):  $\delta$  7.33-7.36 (m, 1H), 7.25-7.28 (m, 2H), 7.11 (d,  $J = 7.4$ , 1H), 2.77 (t,  $J = 6.7$  Hz, 2H), 1.91 (quin,  $J = 6.6$  Hz, 2H), 1.66-1.69 (m, 2H), 1.18 (s, 6H).  $^{13}\text{C}$ -NMR (150 MHz,  $\text{CDCl}_3$ ):  $\delta$  215.1, 141.5, 137.4, 130.8, 128.7, 127.2, 126.7, 46.1, 37.8, 33.2, 25.9, 23.4. HRMS (EI): Calcd. for  $\text{C}_{13}\text{H}_{16}\text{O}^+$   $[\text{M}]^+$  188.1201, found 18.1201.

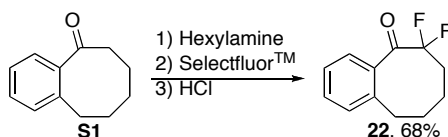

**Scheme S6.** Synthesis of ketone **22**.

**Compound 22.** Ketone **S1**<sup>12</sup> (88 mg, 0.51 mmol, 1 equiv) was dissolved in cyclohexane (12 mL) and hexylamine (90  $\mu\text{L}$ , 0.68 mmol, 1.3 equiv) and trifluoroacetic acid (1 drop) were added. The reaction was heated to reflux overnight. The following morning the reaction mixture was washed with sat.  $\text{NaHCO}_3$  (1 x 15 mL) and brine (1 x 15 mL). The organic solution was dried over  $\text{MgSO}_4$  and evaporated to dryness. The resulting crude imine (155 mg) was dissolved in  $\text{CH}_3\text{CN}$  (5 mL). To this solution Selectfluor™ (354 g, 1.0 mmol, 2.0 equiv) and  $\text{Na}_2\text{SO}_4$  (50.3 mg, 0.35 mmol) were added. The reaction mixture was heated to reflux overnight. The following morning 3M HCl was added to hydrolyze the imine. After 10 min at reflux, the solution was cooled to rt and evaporated to dryness. The residue was dissolved in  $\text{Et}_2\text{O}$  (10 mL), washed with sat.  $\text{NaHCO}_3$  (1 x 5 mL) and brine (1 x 5 mL). The organic solution was dried over  $\text{MgSO}_4$  and evaporated to dryness. The crude mixture was purified by flash chromatography with a hexane/EtOAc solvent system (96:4 hexane/EtOAc). This procedure yielded pure **22** (72

<sup>12</sup> McCague, R. *Tetrahedron: Asymmetry* **1990**, *1*, 97.

mg, 0.34 mmol, 68%).  $R_f = 0.8$  in 3:1 hexane/EtOAc).  $^1\text{H-NMR}$  (600 MHz,  $\text{CDCl}_3$ ):  $\delta$  7.41 (td,  $J = 7.6, 1.4$  Hz, 1H), 7.30 (td,  $J = 7.5, 1.0$  Hz, 1H), 7.23 (dd,  $J = 7.6, 1.0$  Hz, 1H), 7.21 (dd,  $J = 7.7, 0.2$  Hz, 1H), 2.73-2.75 (m, 2H), 2.14-2.21 (m, 2H), 1.78 (apparent quin,  $J = 6.2$  Hz, 2H), 1.61 (apparent quin,  $J = 5.3$  Hz, 2H).  $^{13}\text{C-NMR}$  (150 MHz,  $\text{CDCl}_3$ ):  $\delta$  198.3 (t,  $J = 29$  Hz), 137.8, 137.0, 130.9, 129.7, 126.5, 126.3, 119.1 (t,  $J = 251$  Hz), 33.1 (t,  $J = 24$  Hz), 31.4, 28.9, 19.0 (t,  $J = 6$  Hz).  $^{19}\text{F-NMR}$  (564 MHz,  $\text{CDCl}_3$ ):  $\delta$  -105.1 (t,  $J = 16$  Hz, 2F). HRMS (EI): Calcd. for  $\text{C}_{12}\text{H}_{12}\text{OF}_2^+ [\text{M}]^+$  210.0856, found 210.0859.



<sup>1</sup>H-NMR of compounds 4-6, 8-14, 16

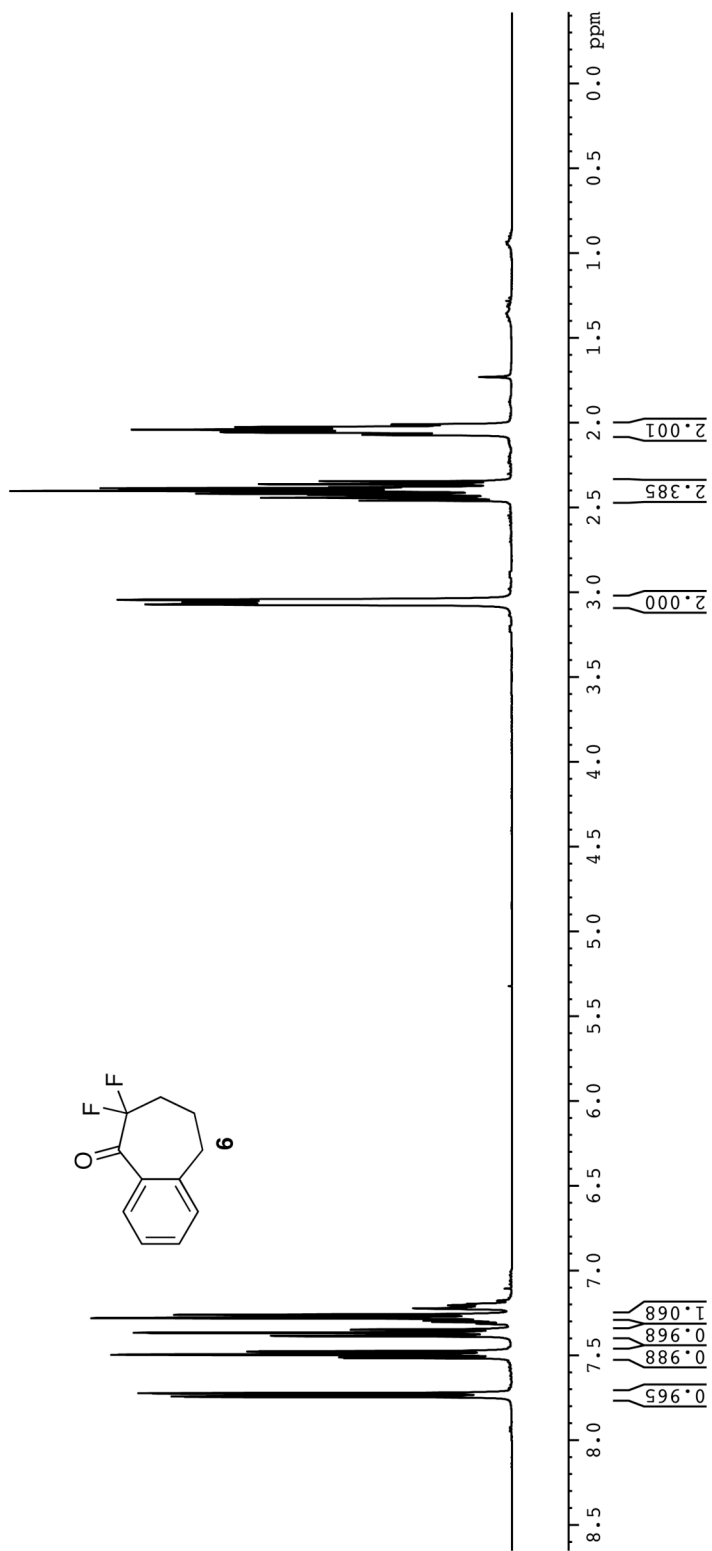

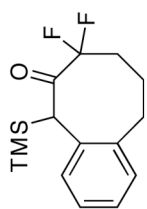

7

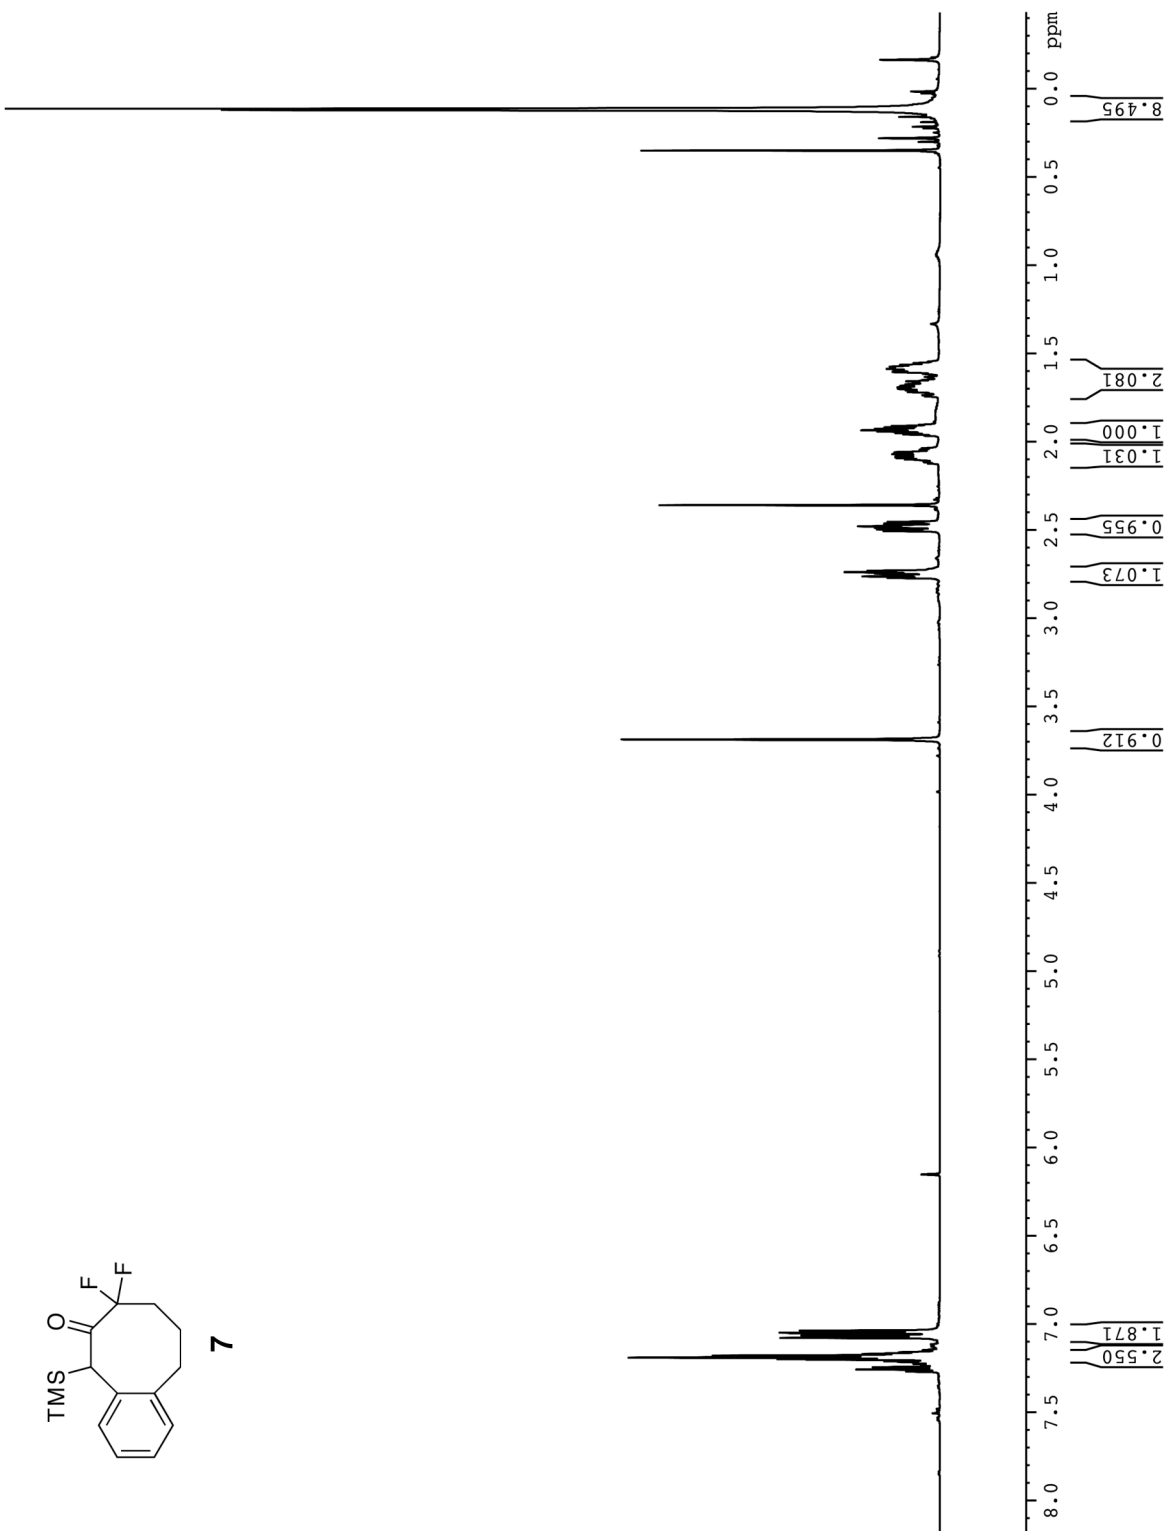

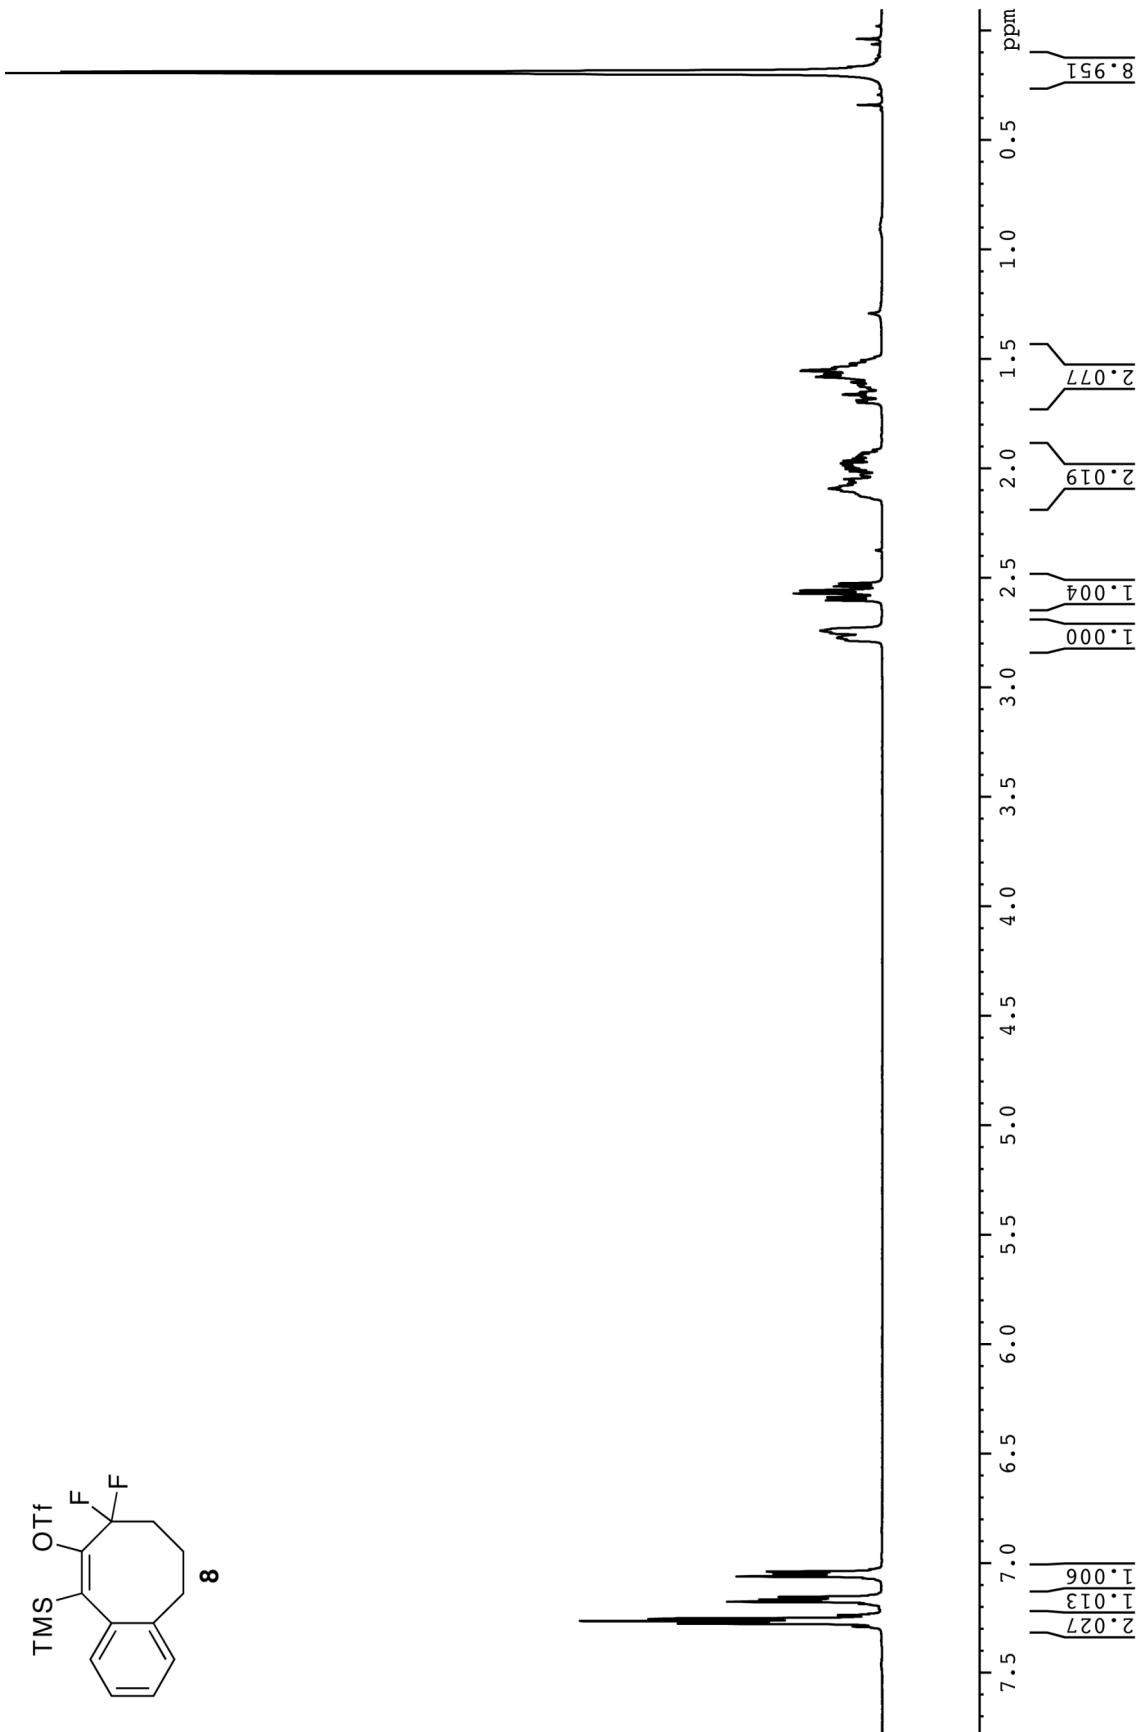

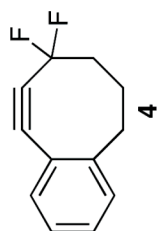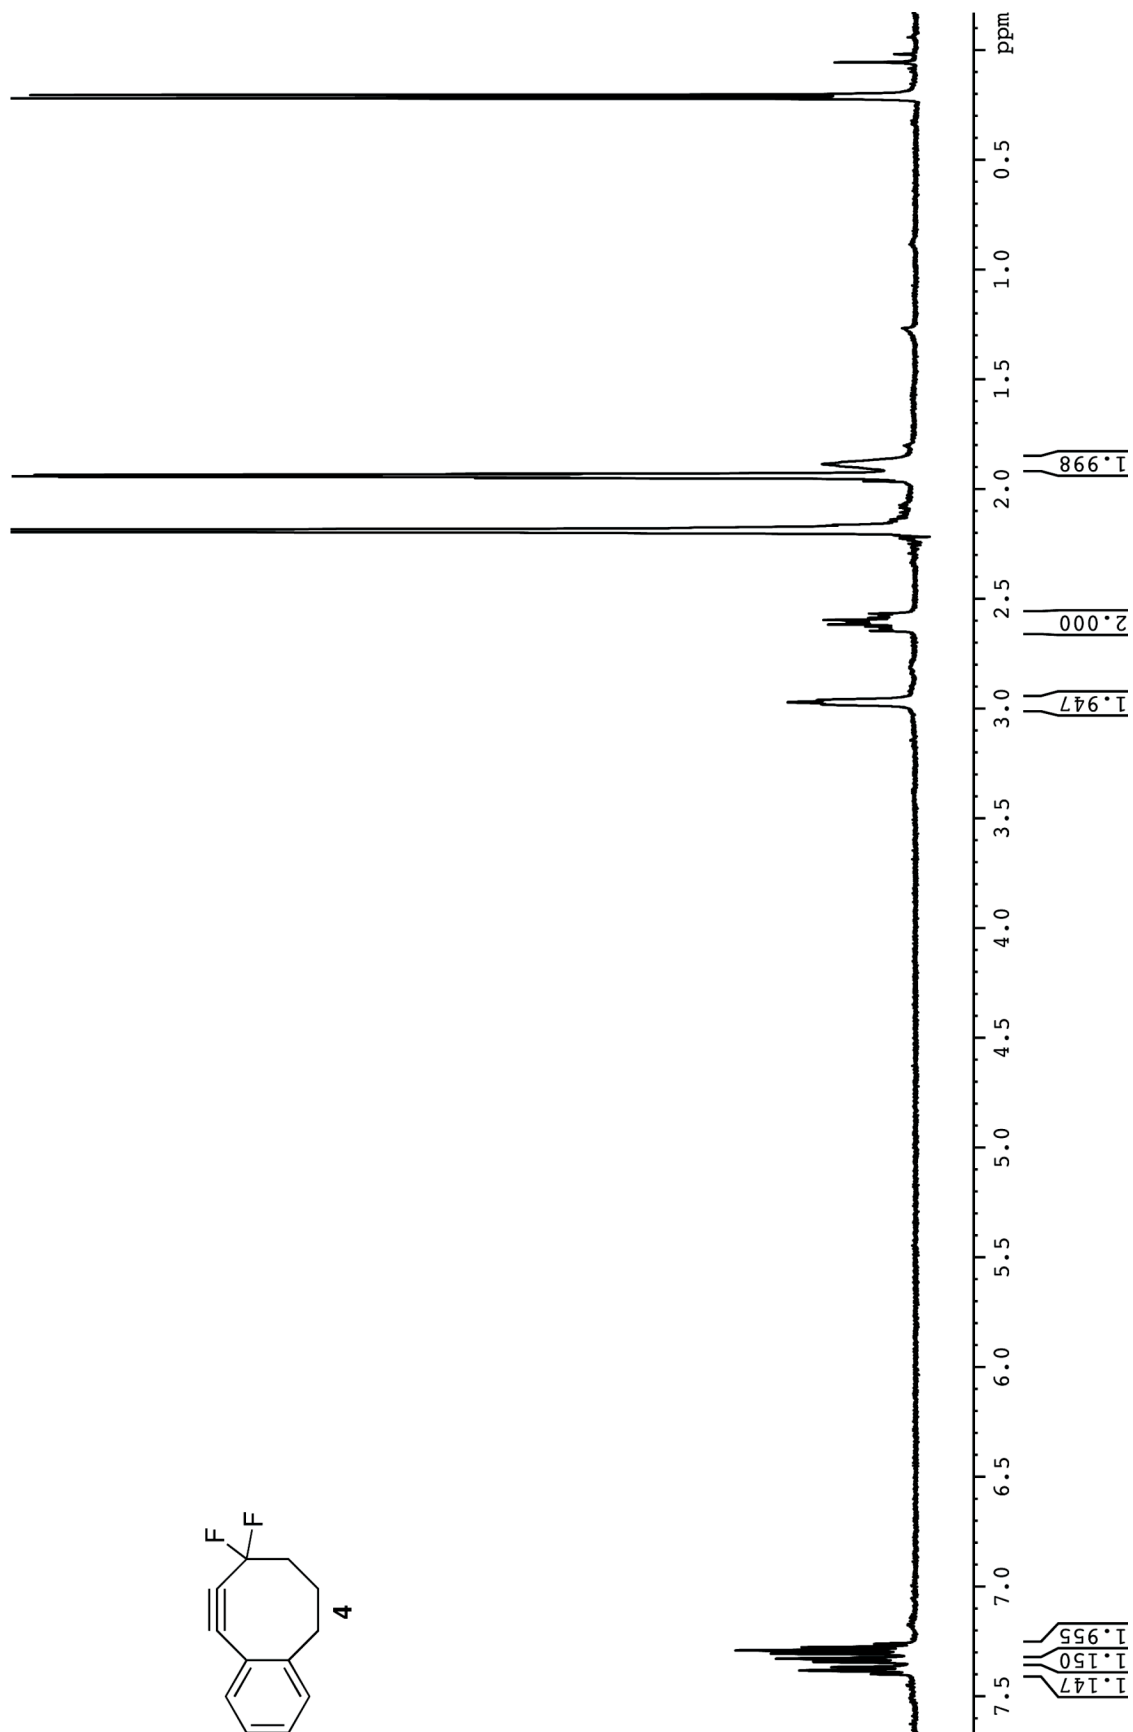

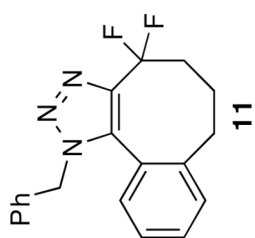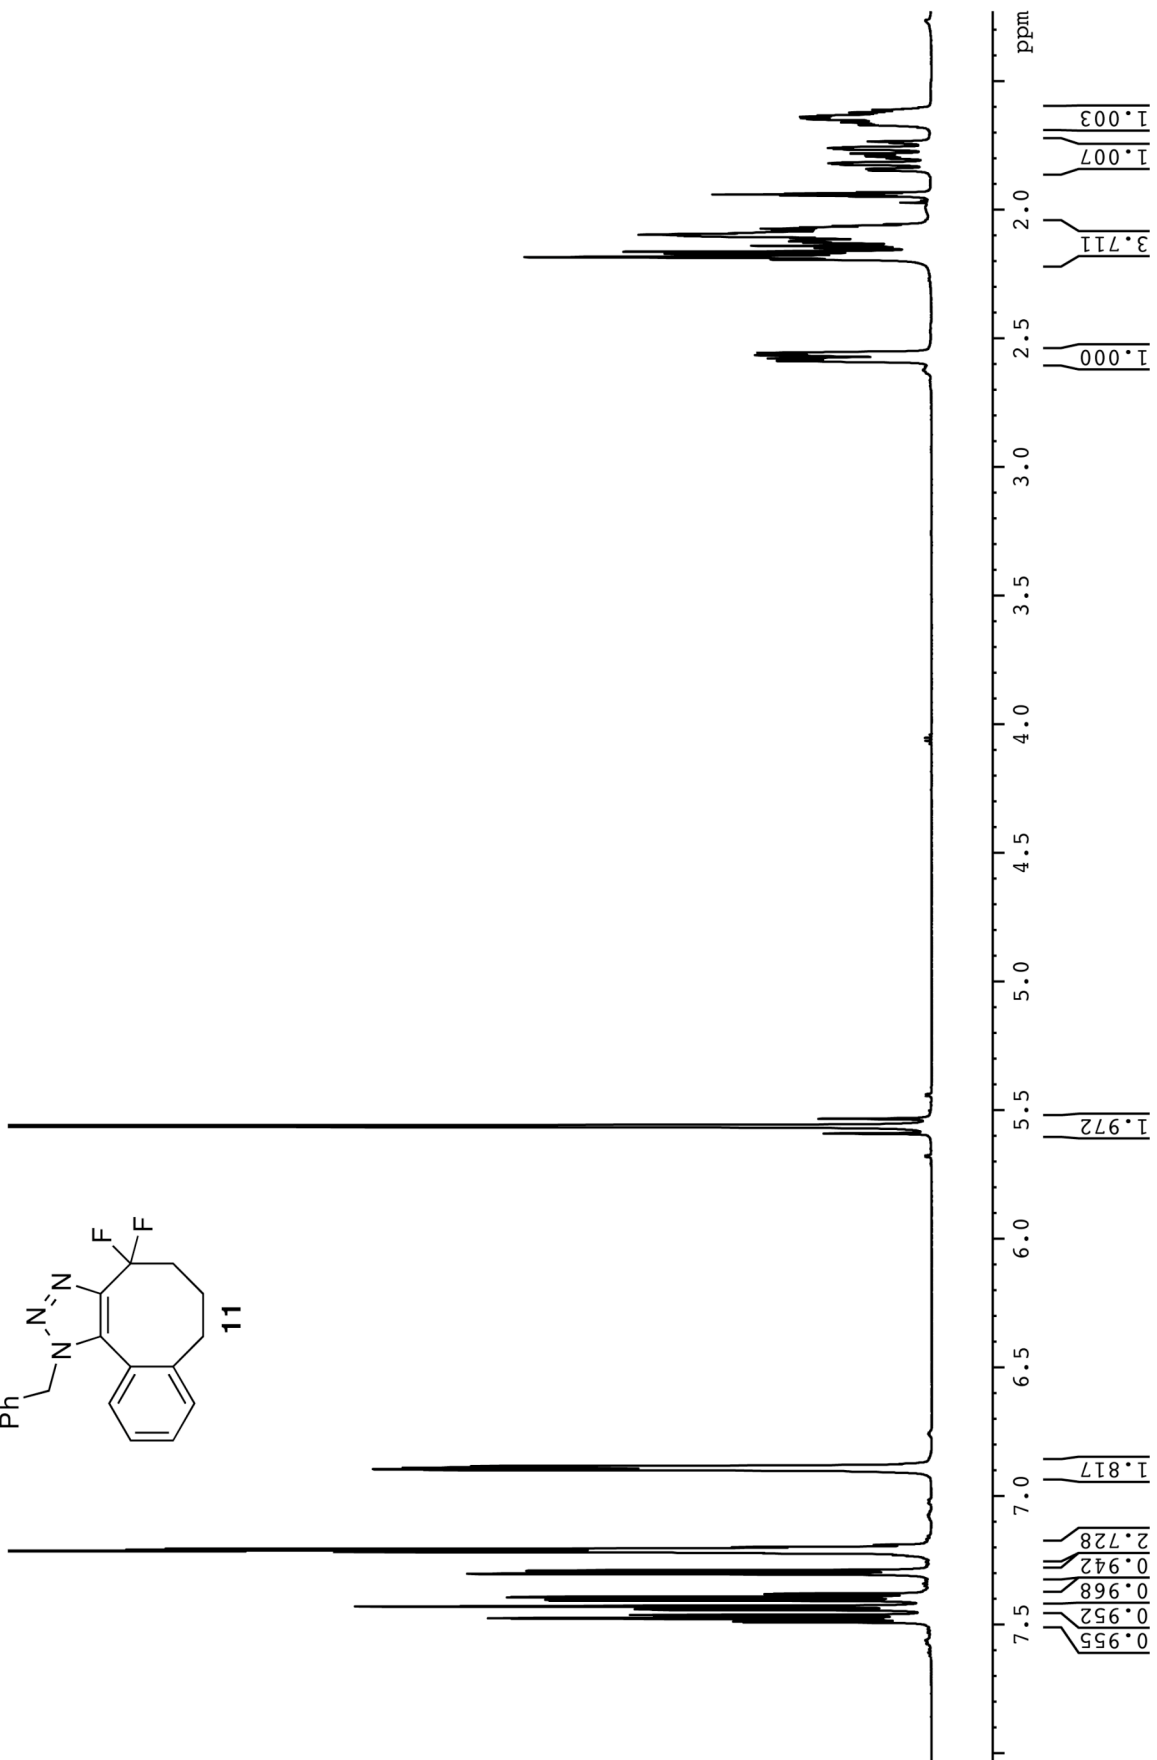

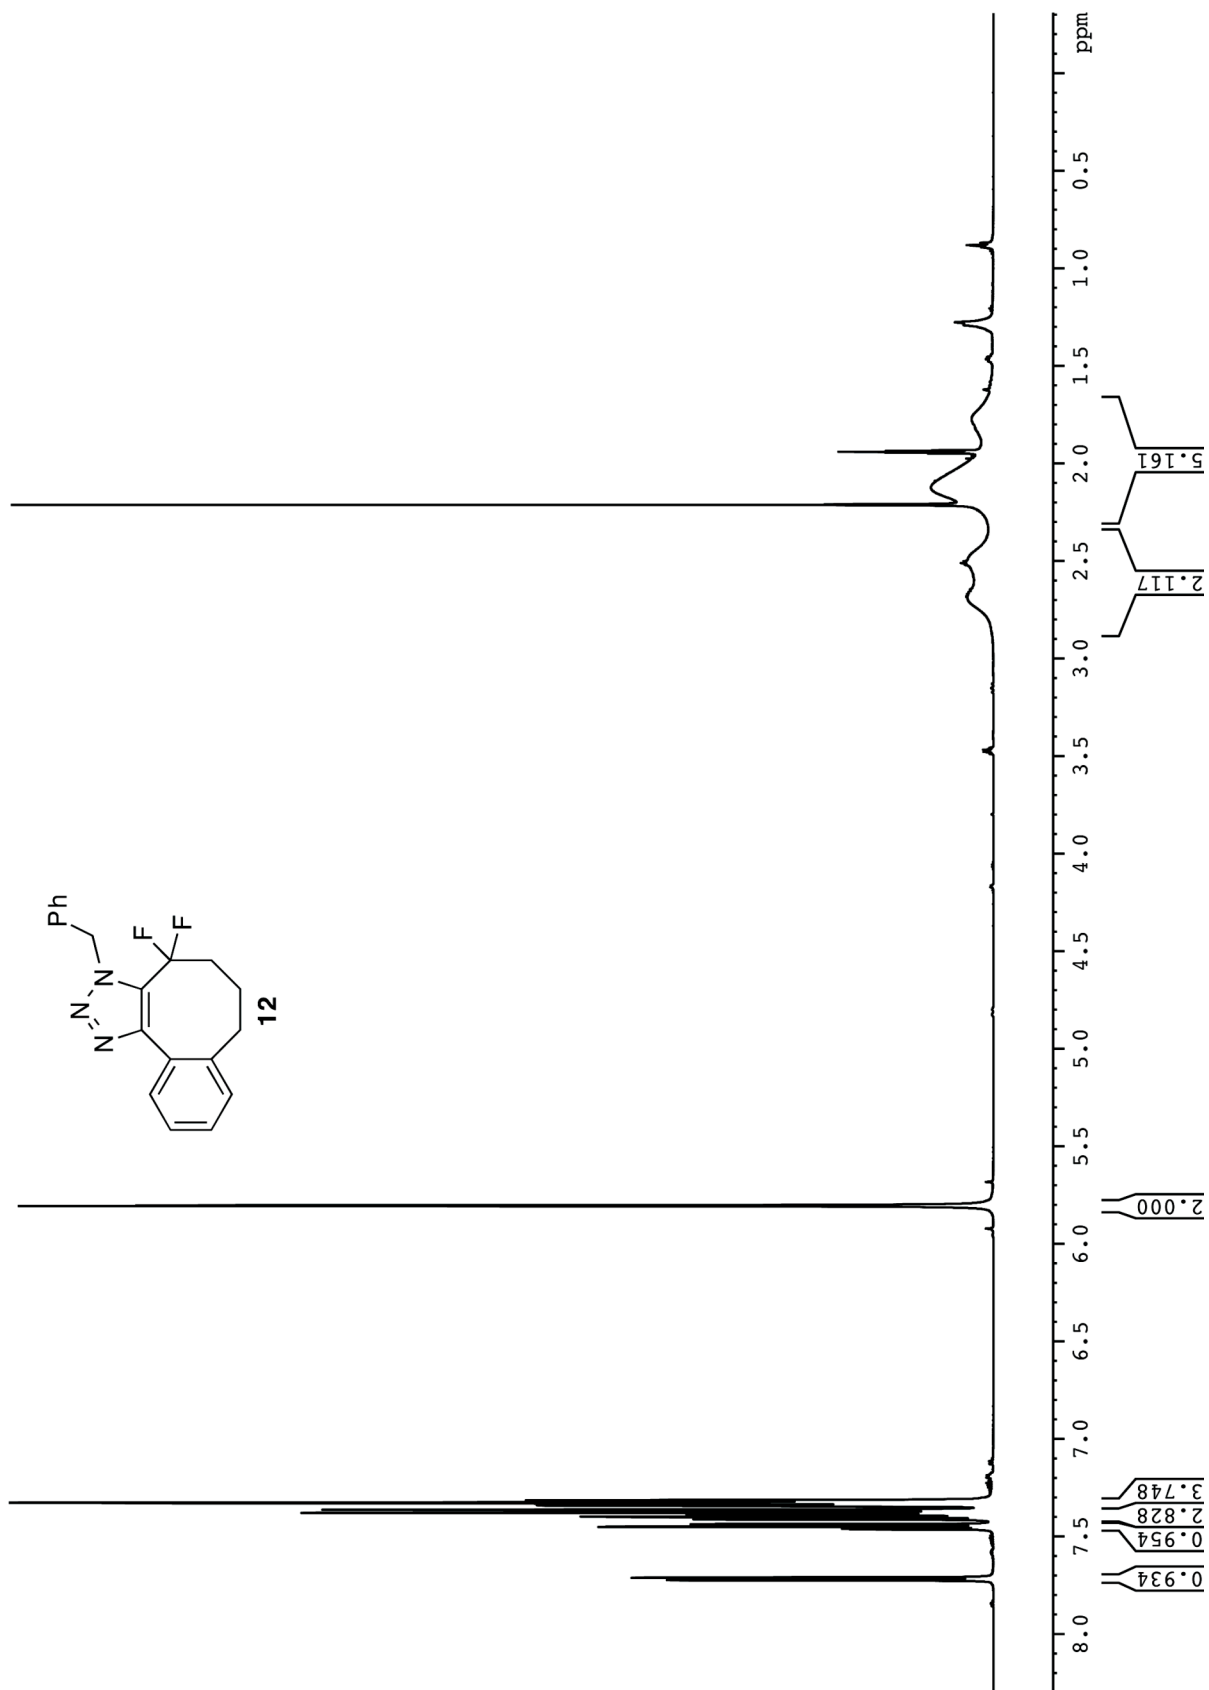

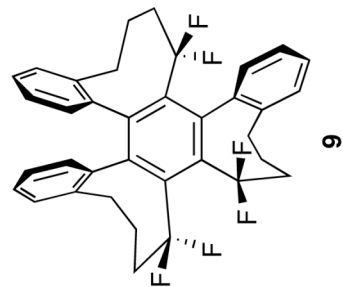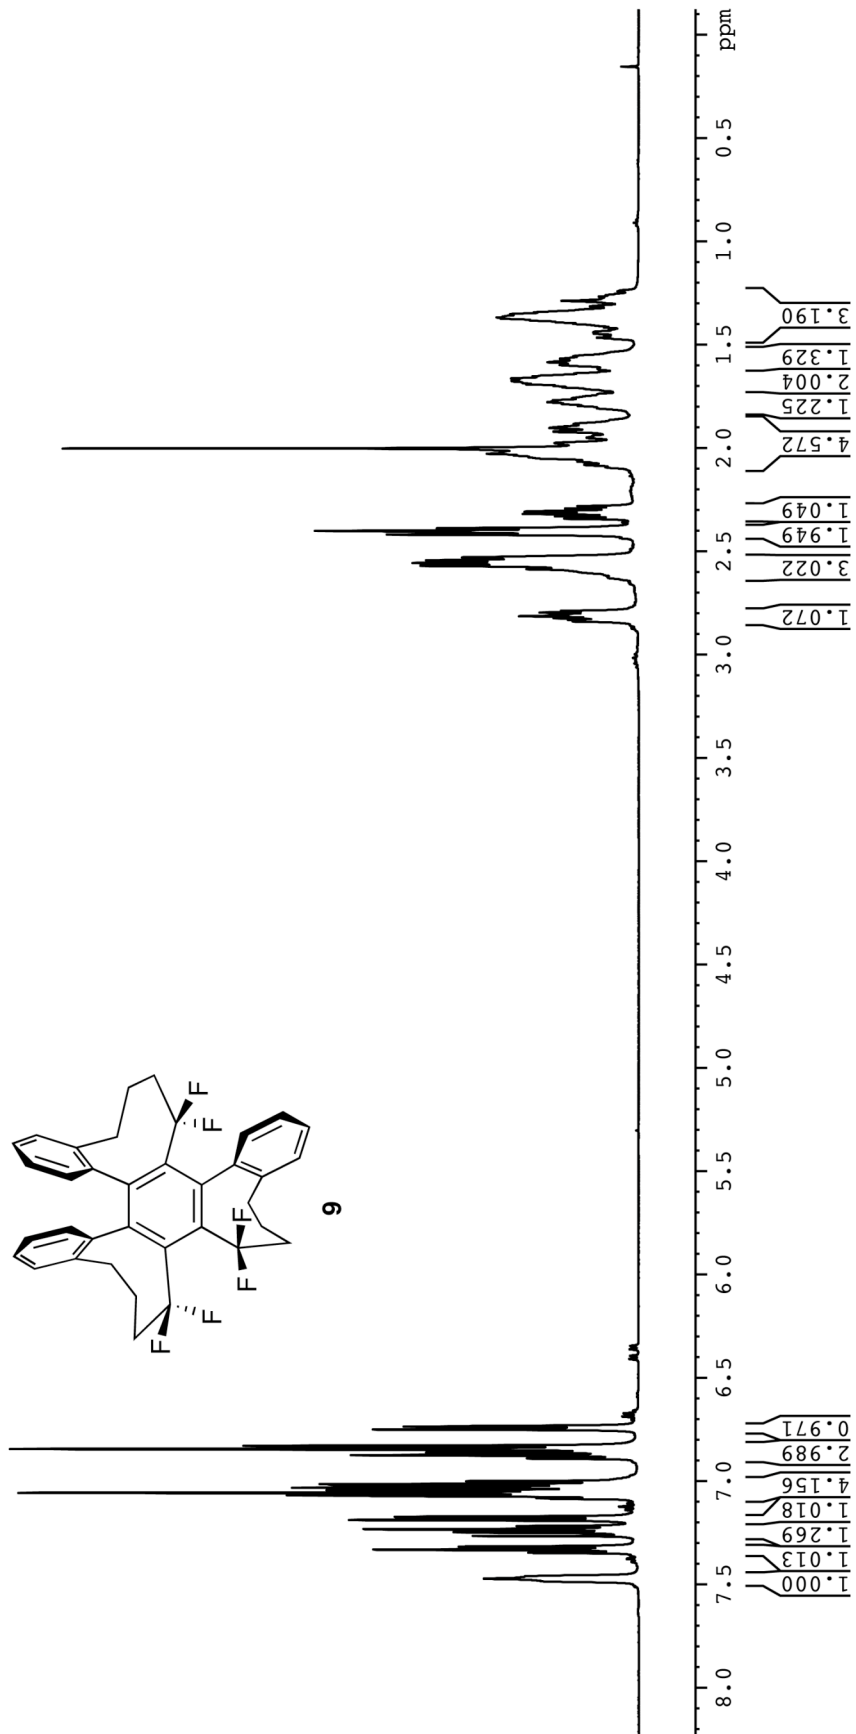

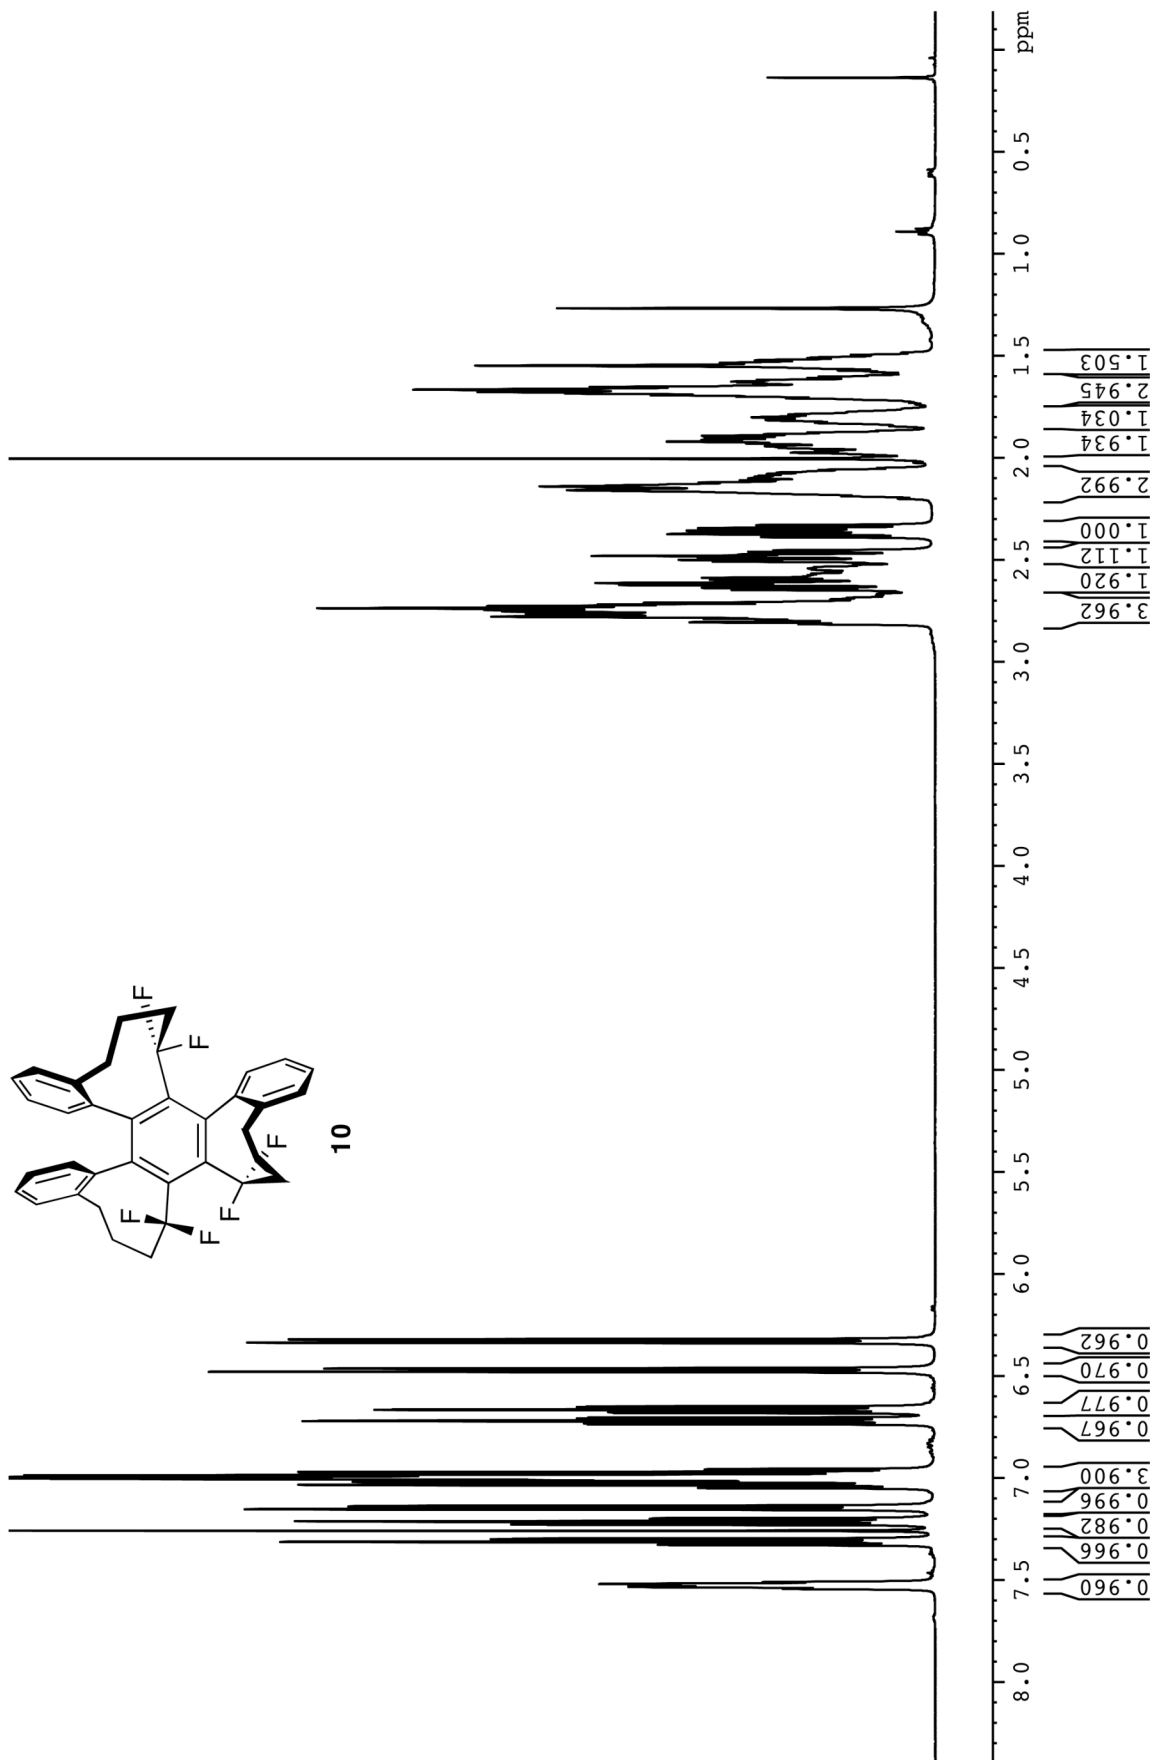



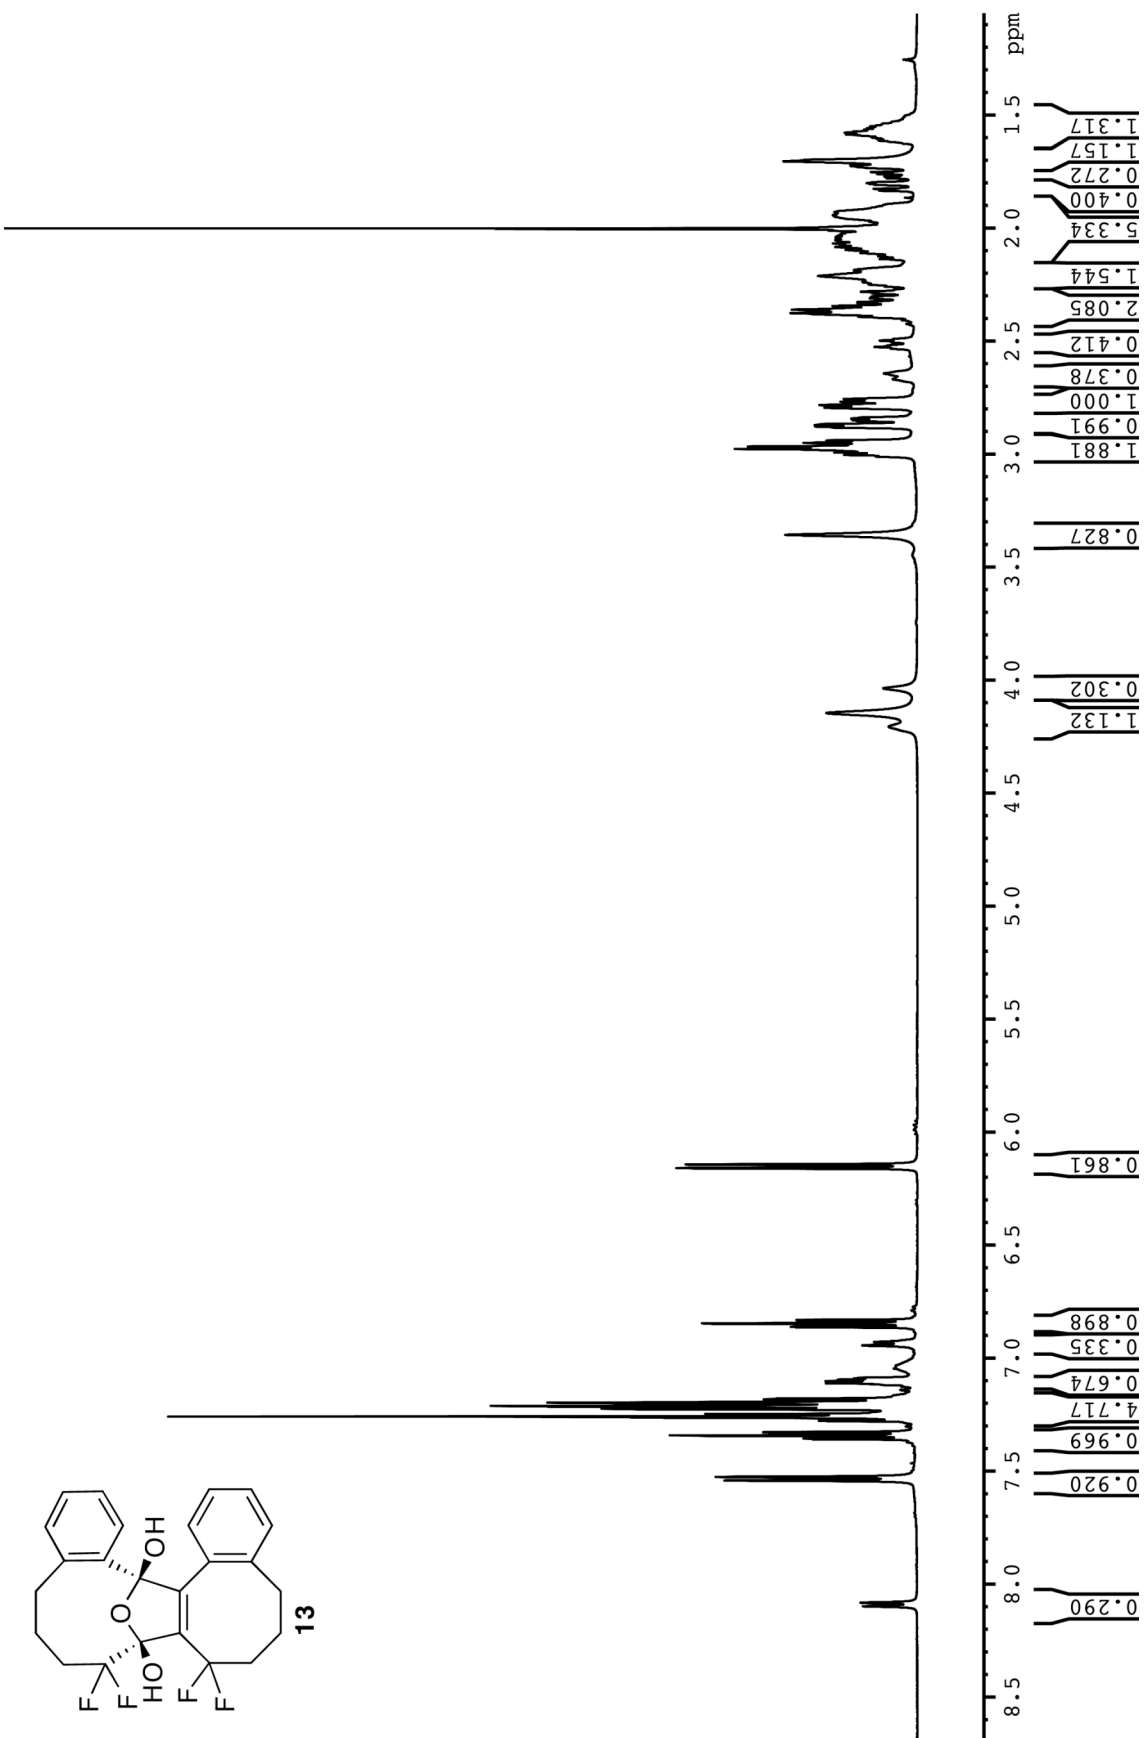

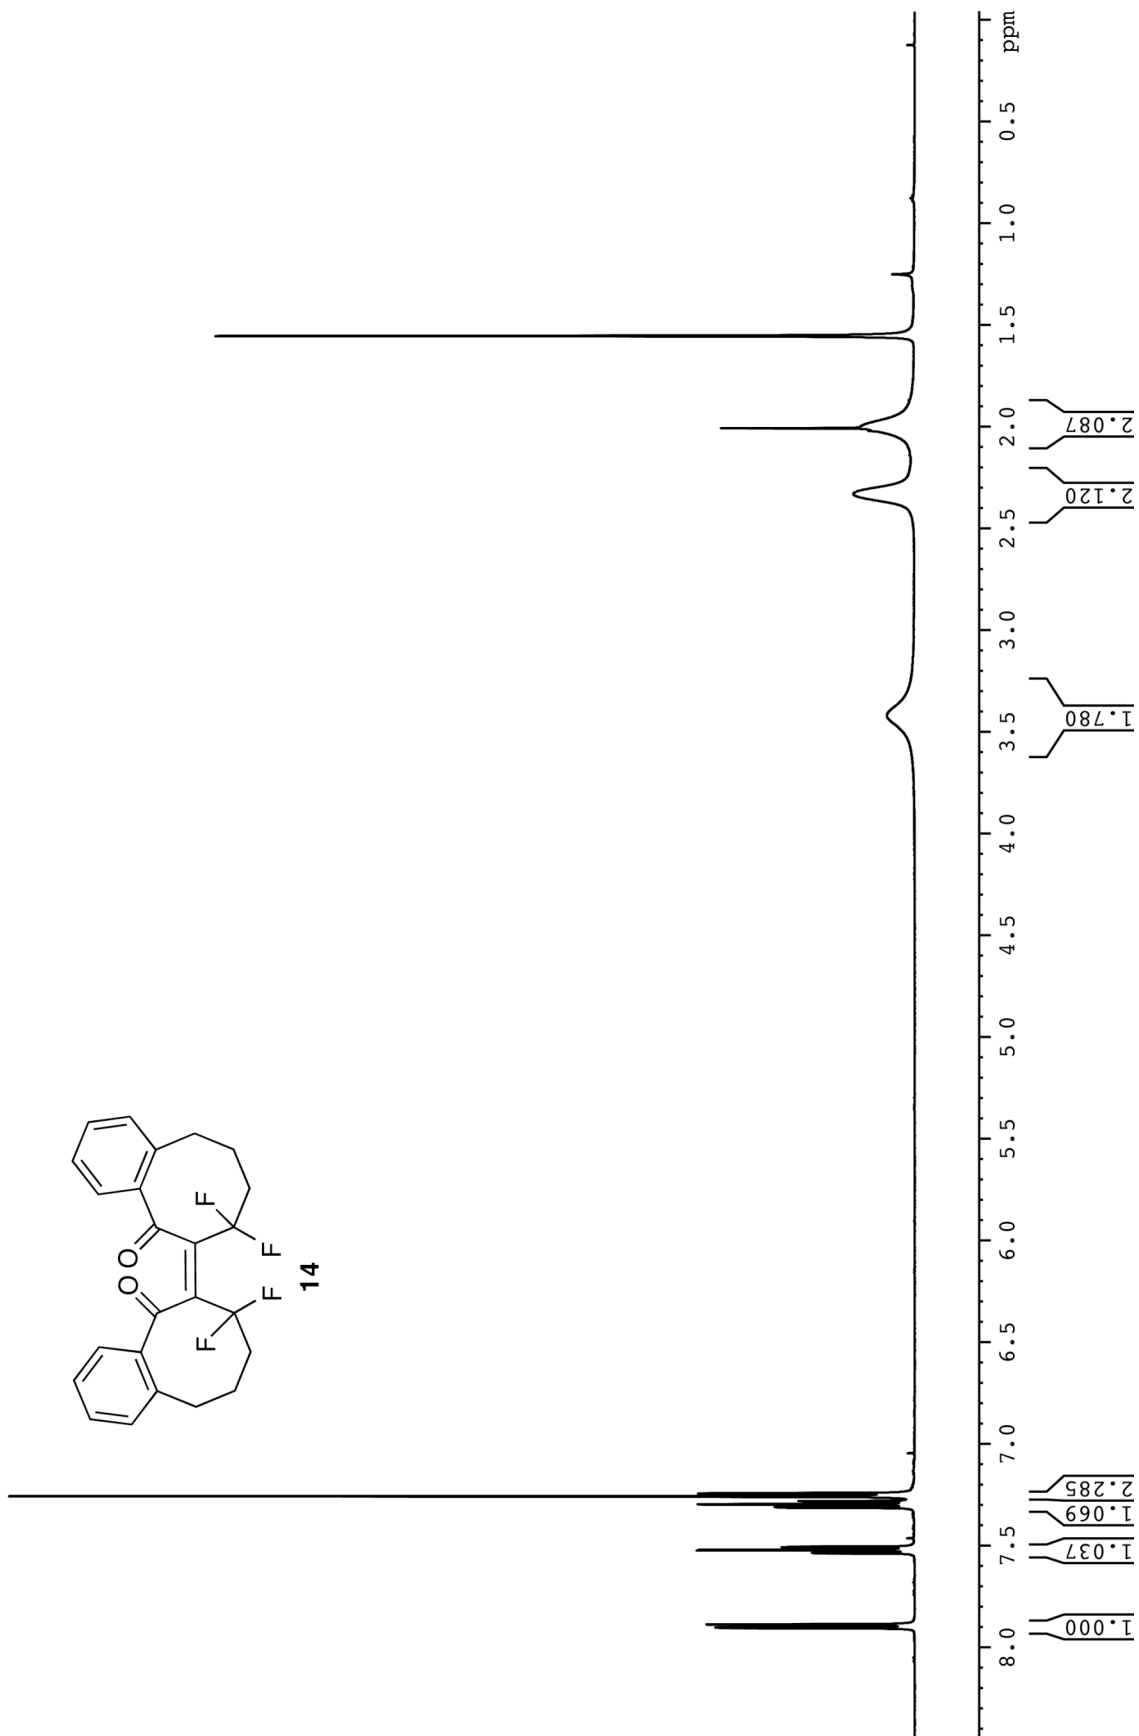

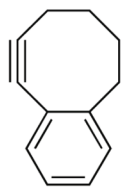

16

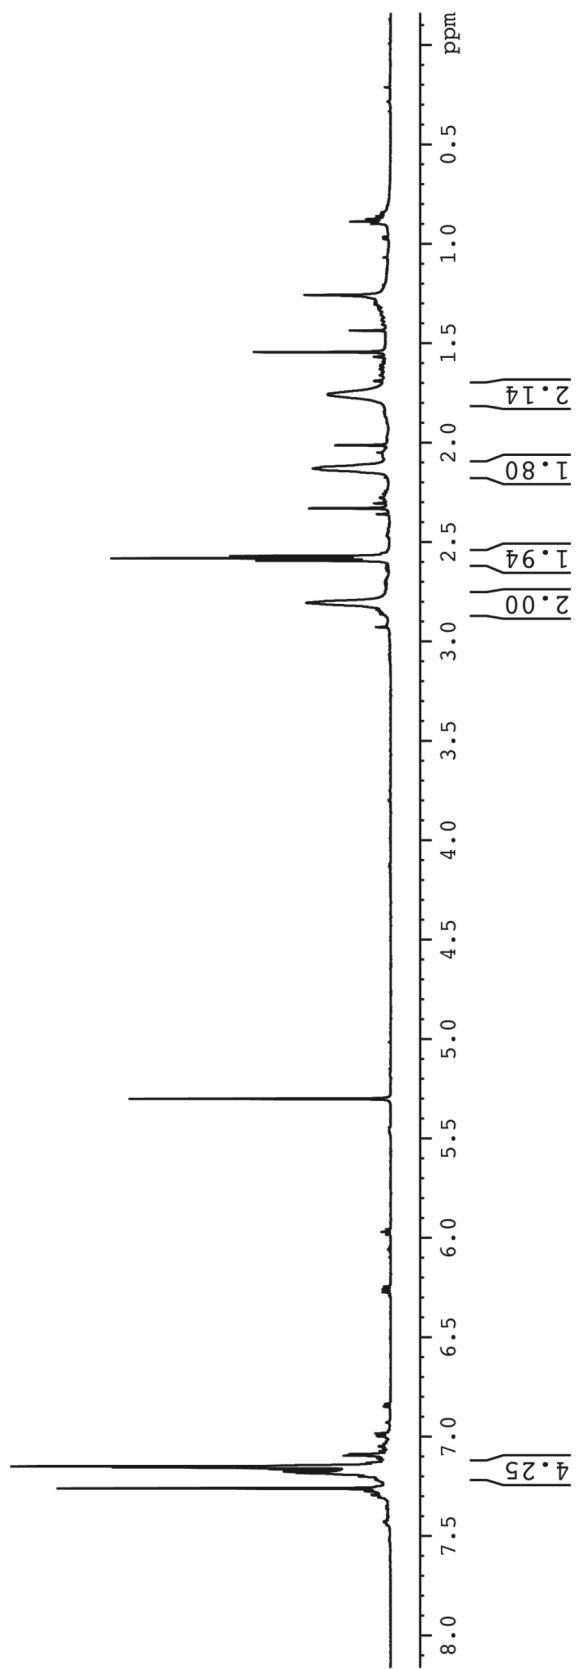

<sup>13</sup>C-NMR of compounds 4-6, 8-14, 16

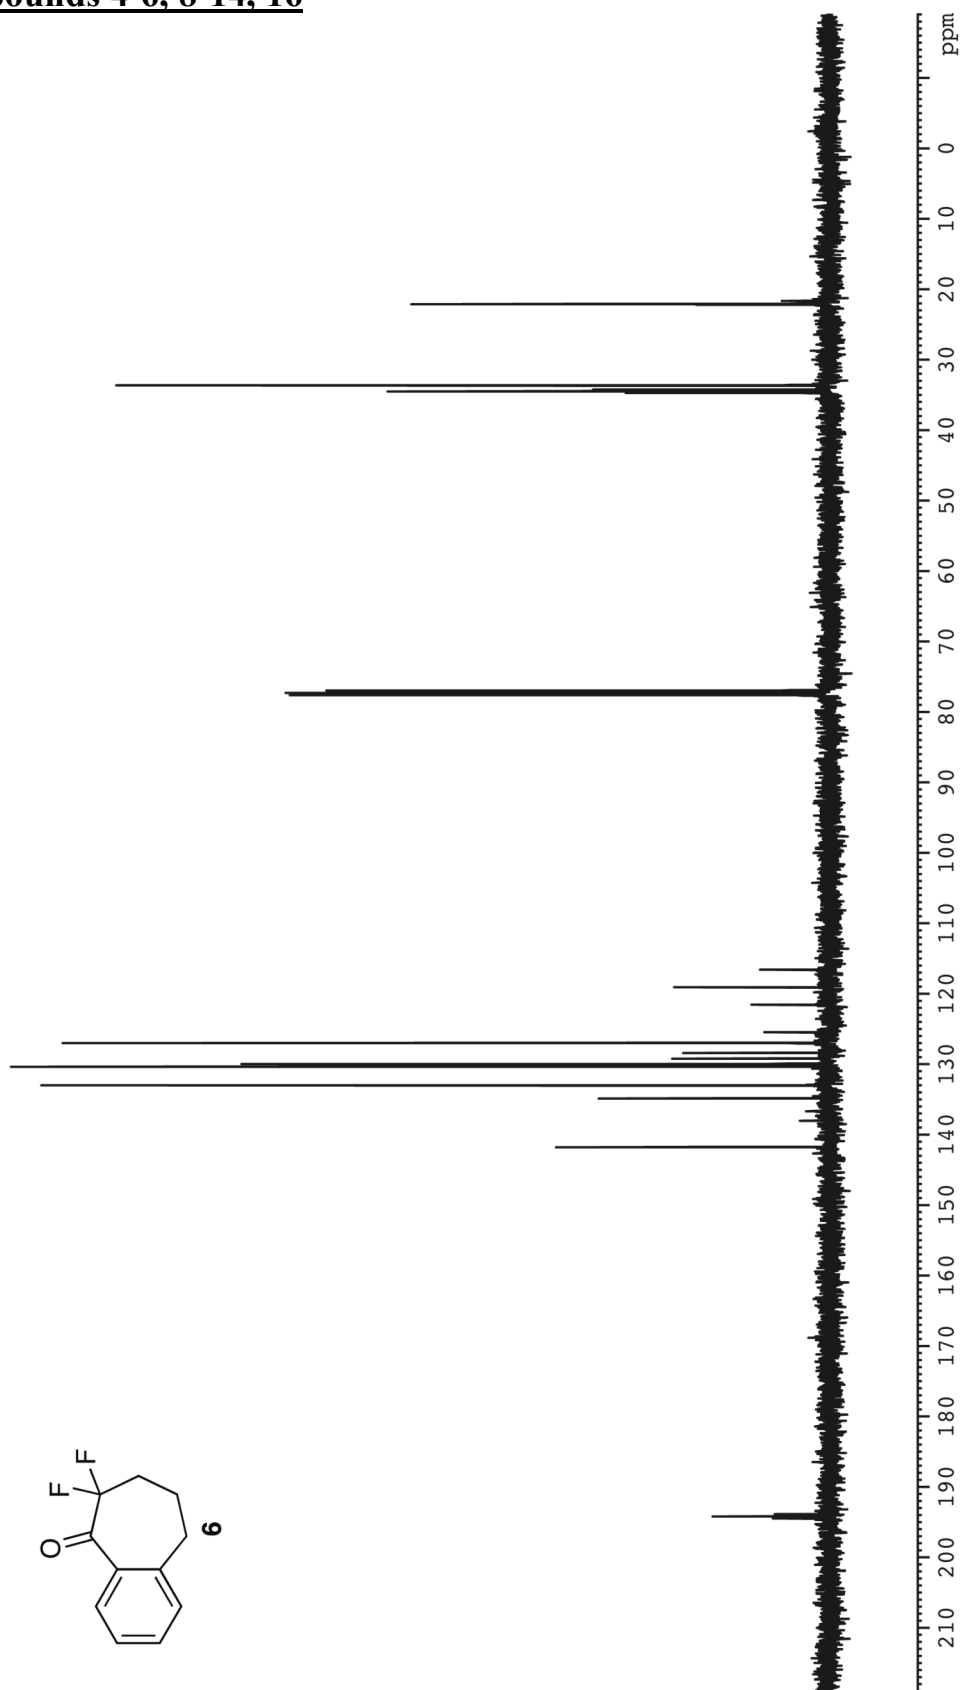

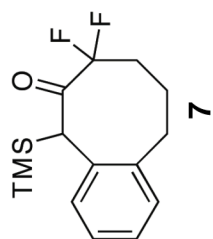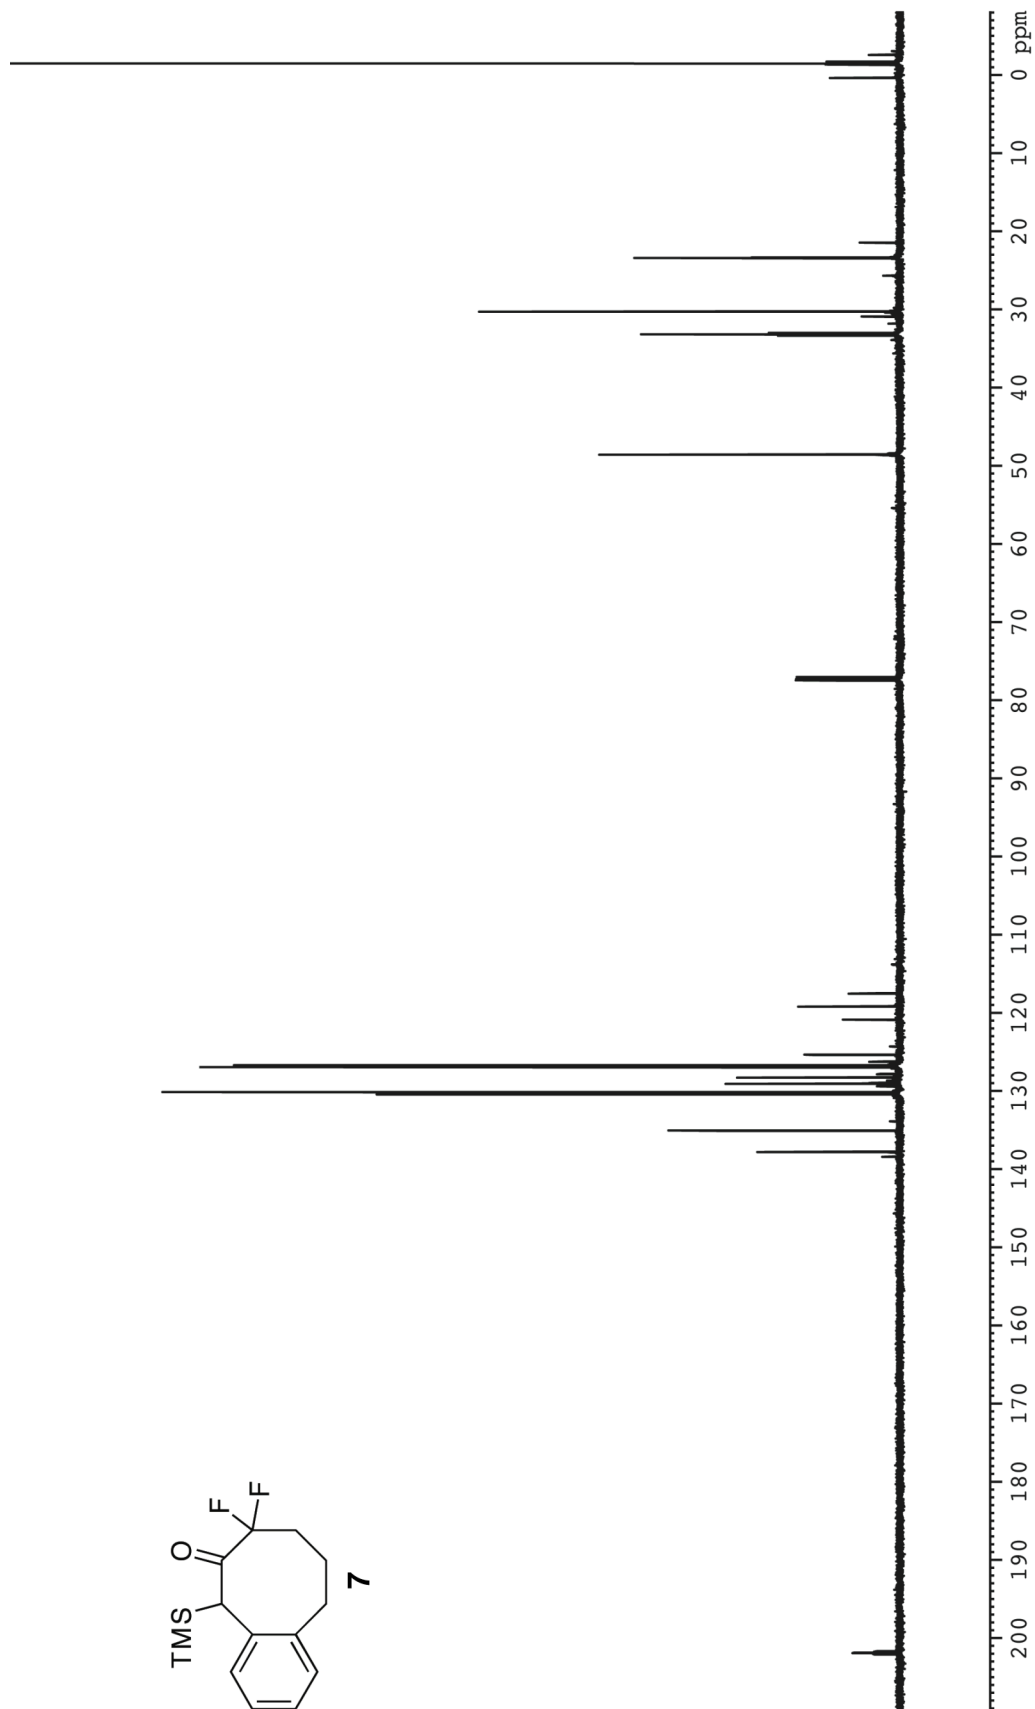

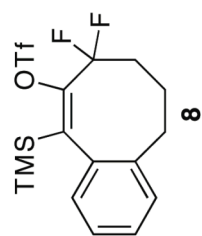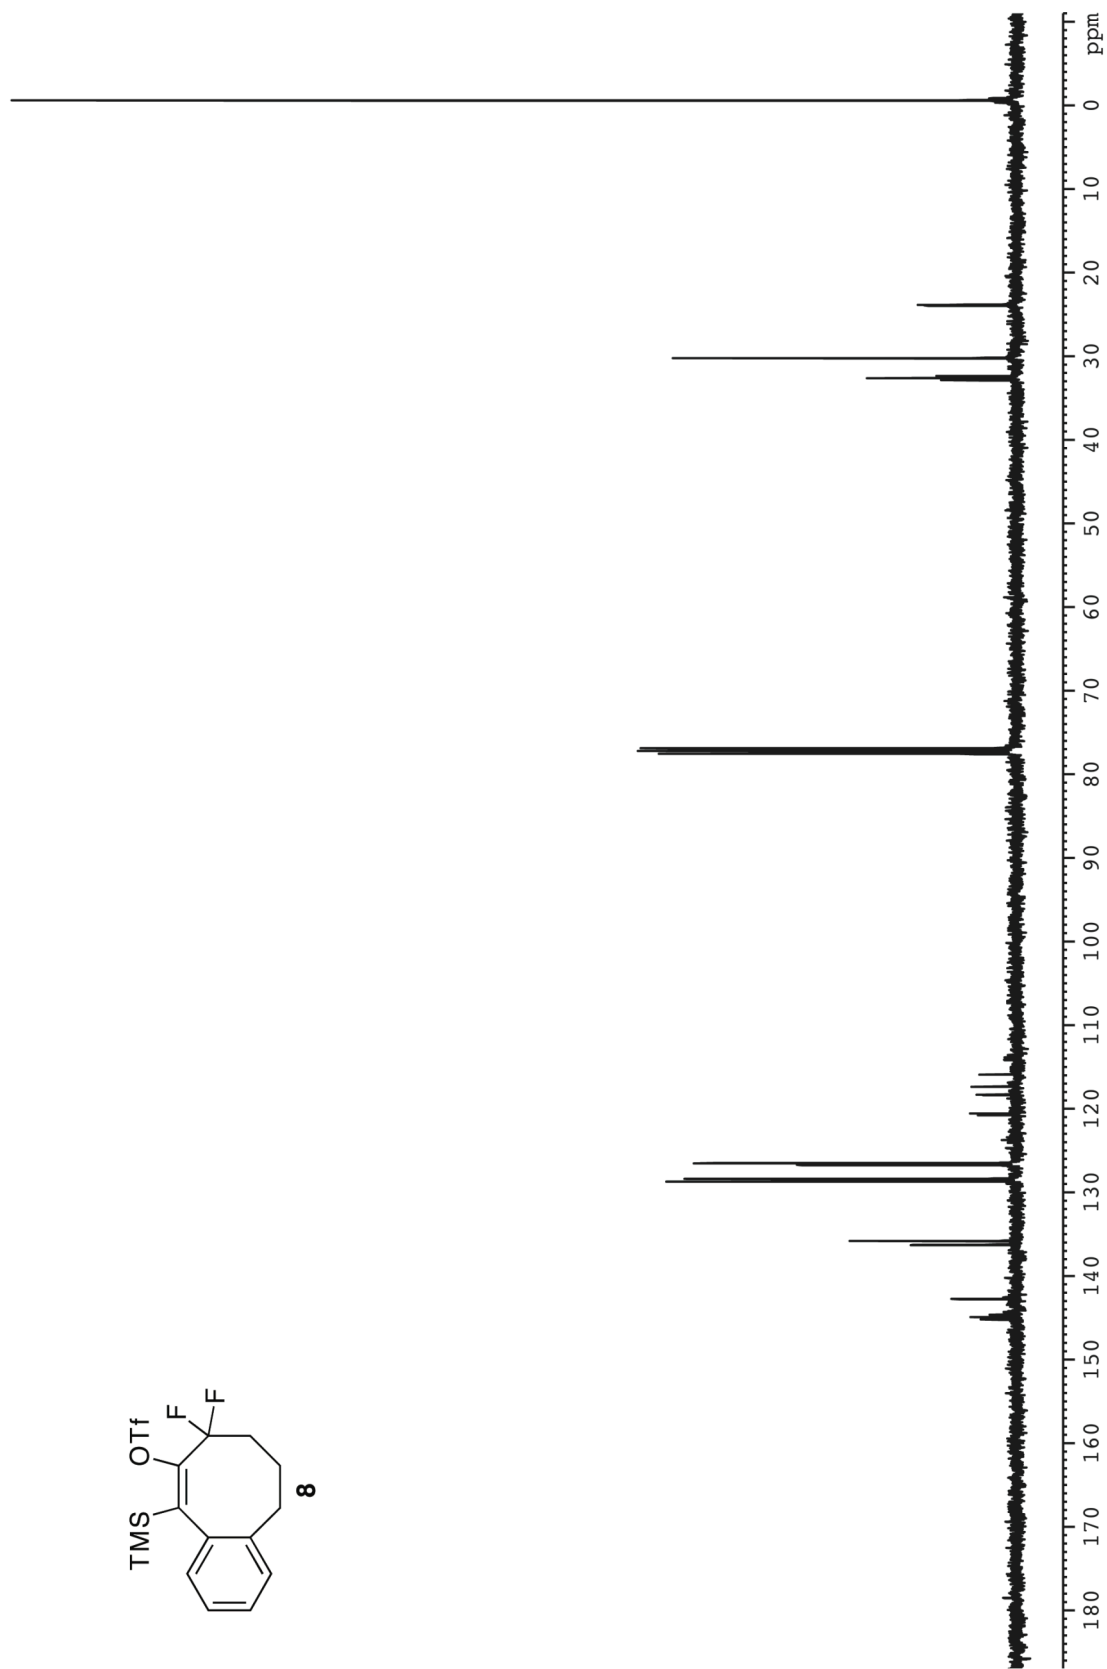

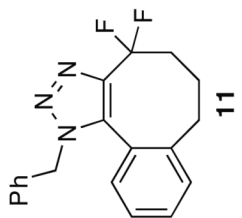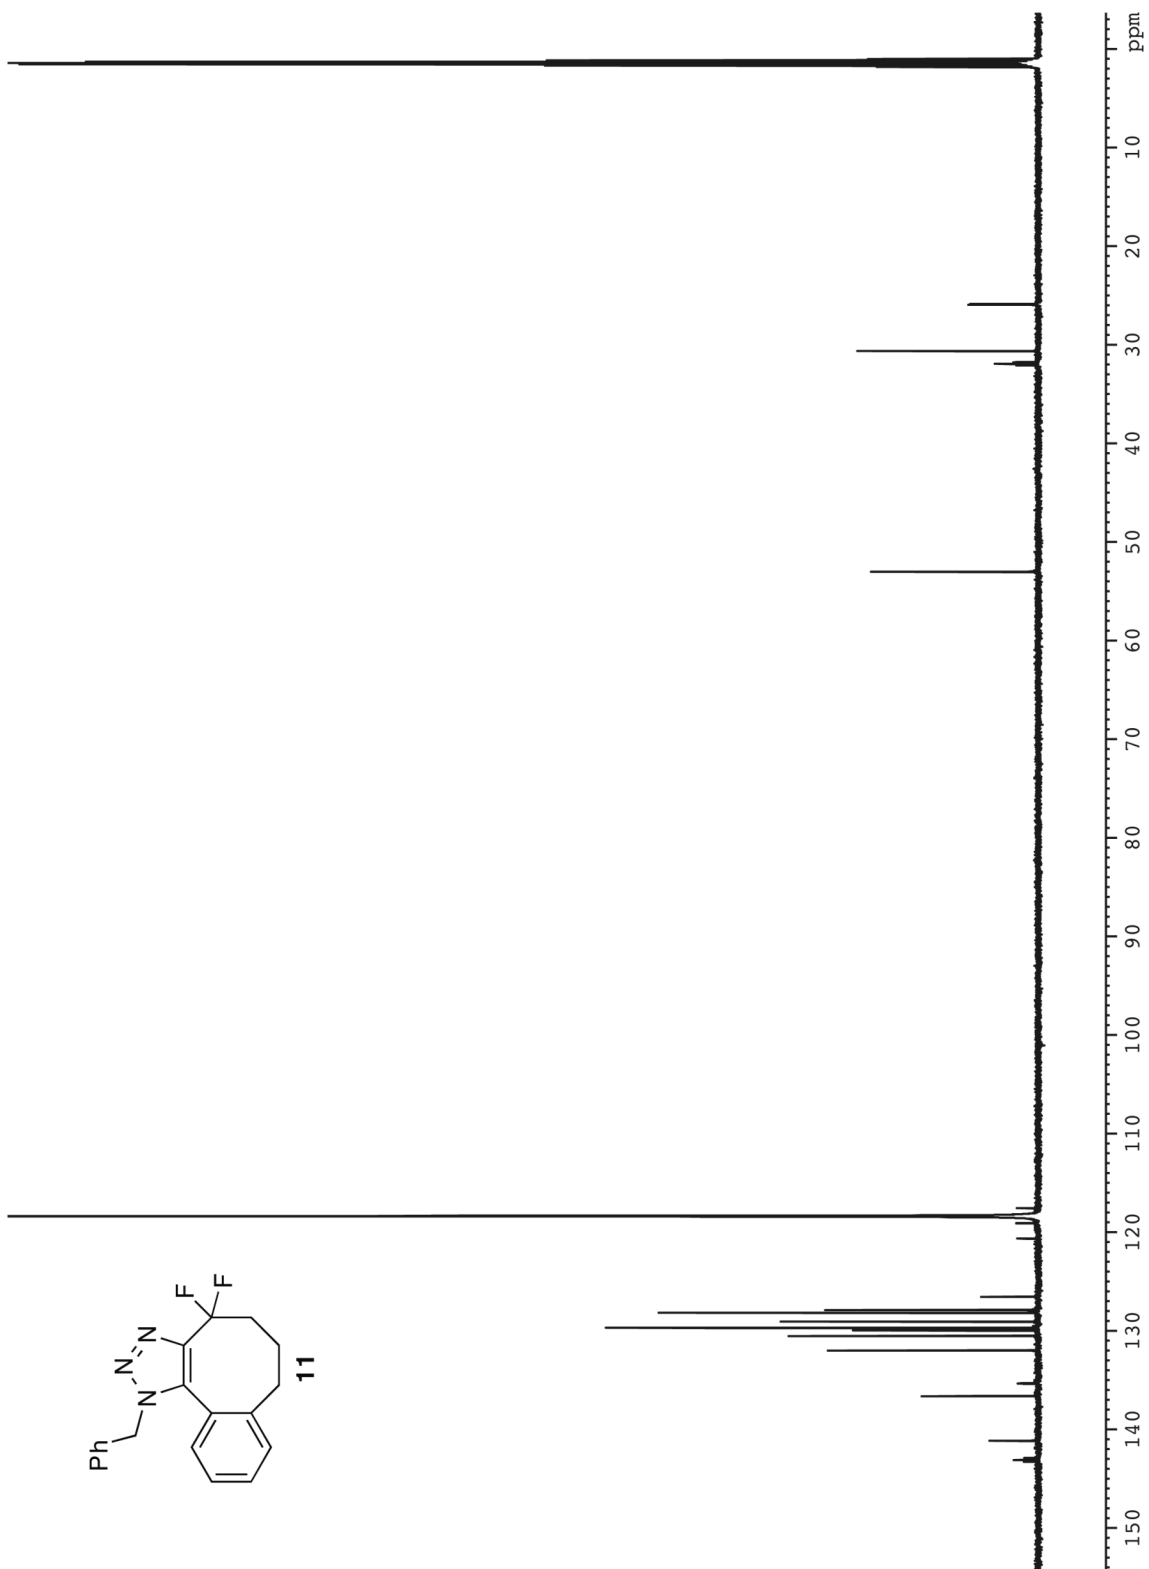

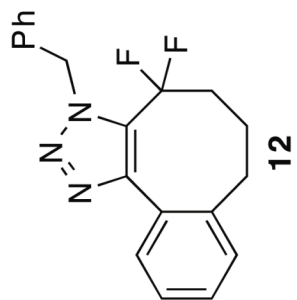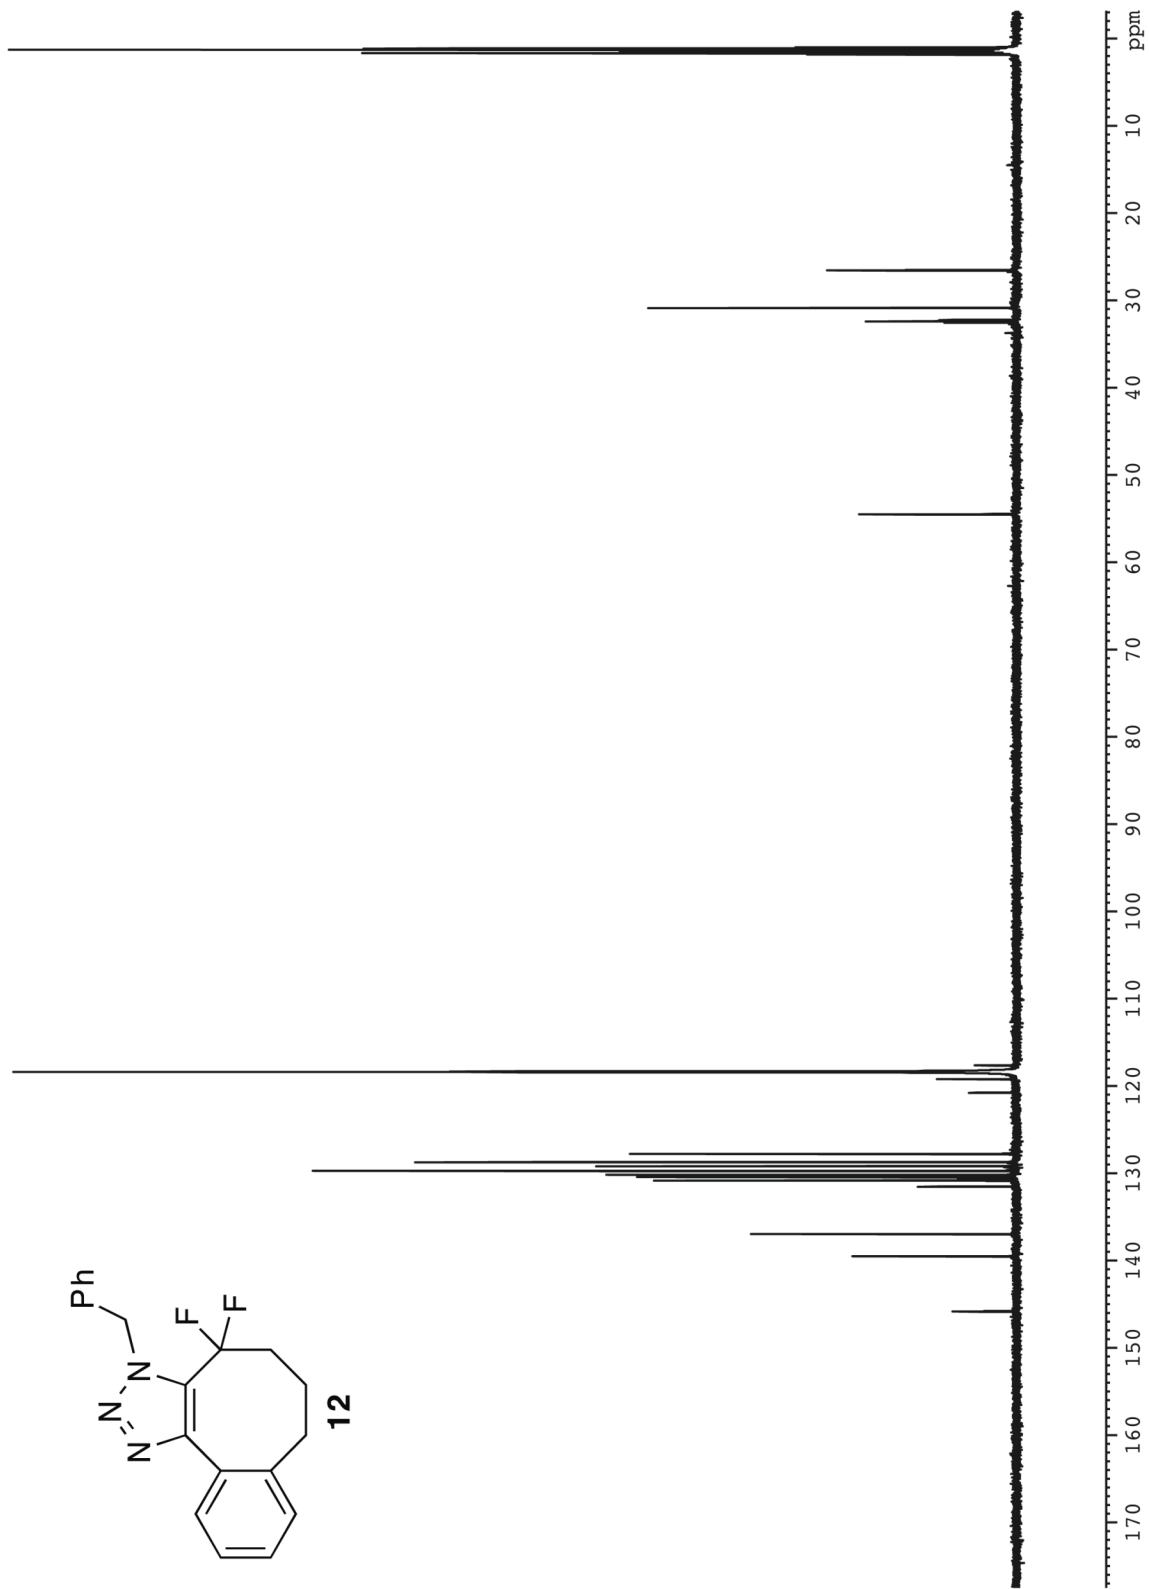



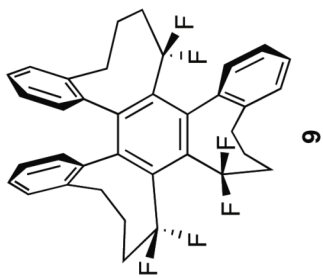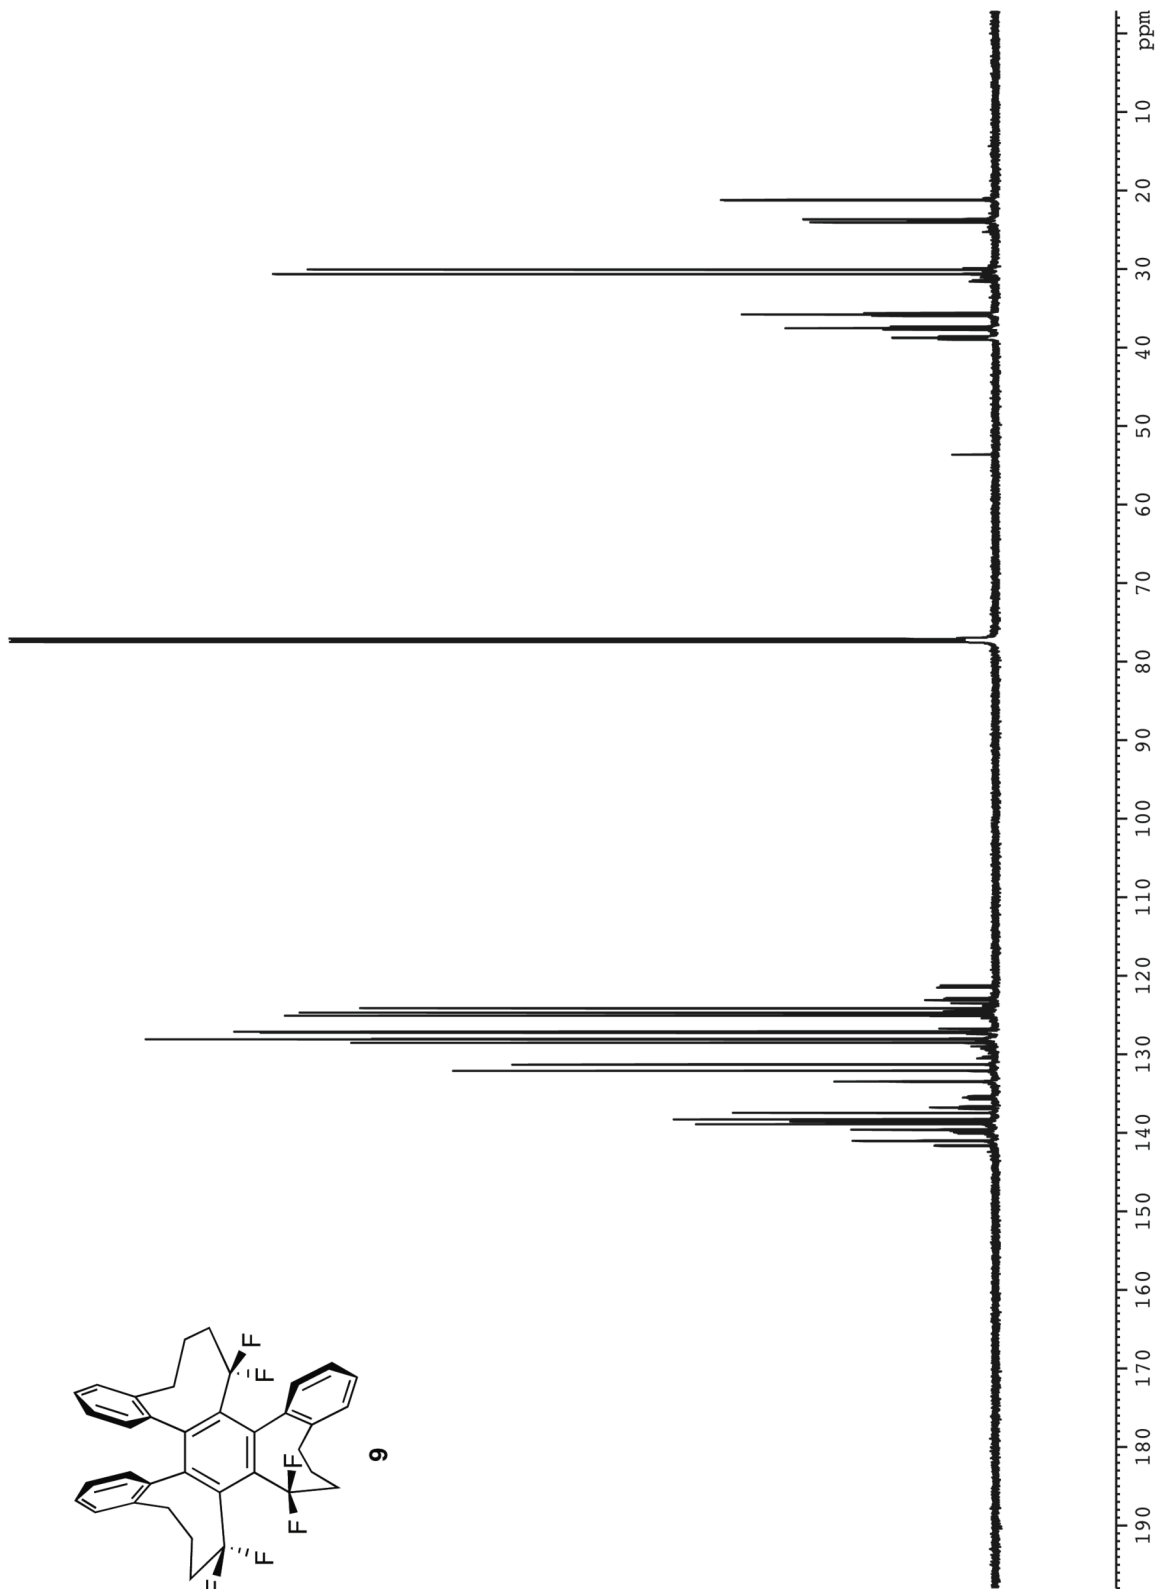

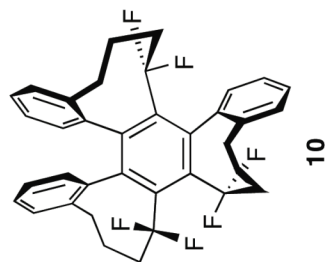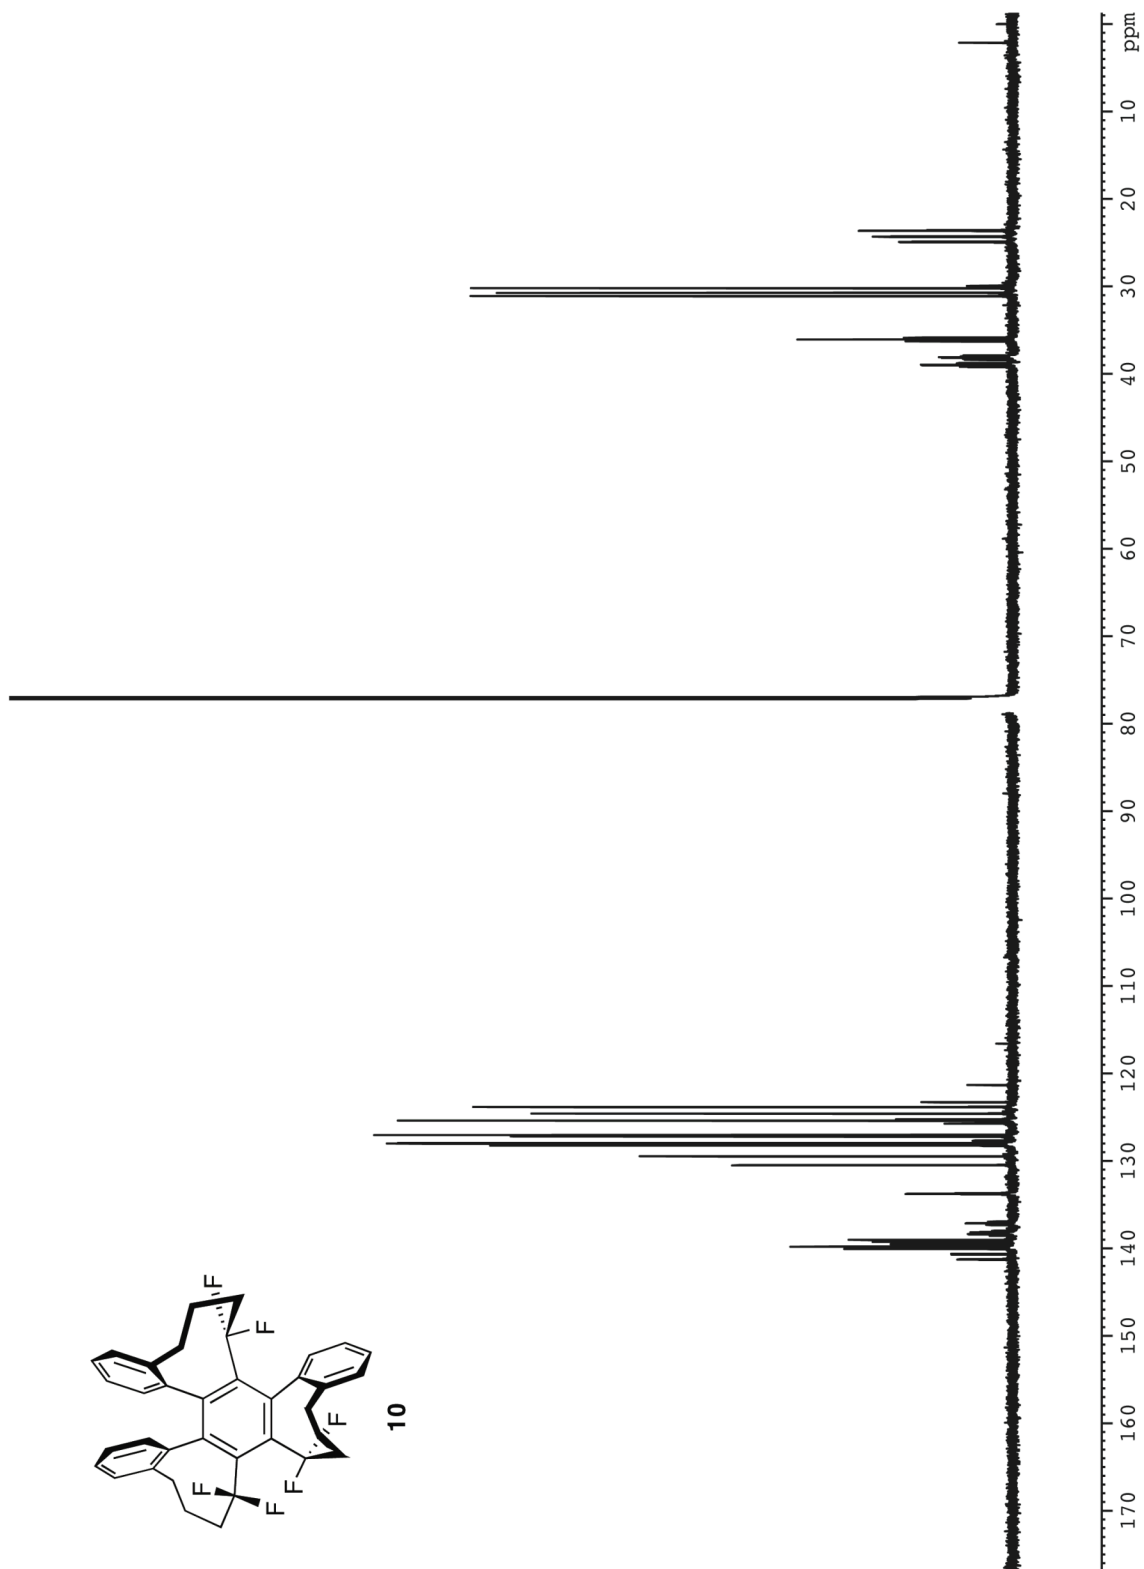

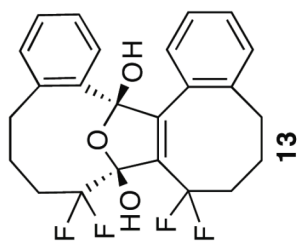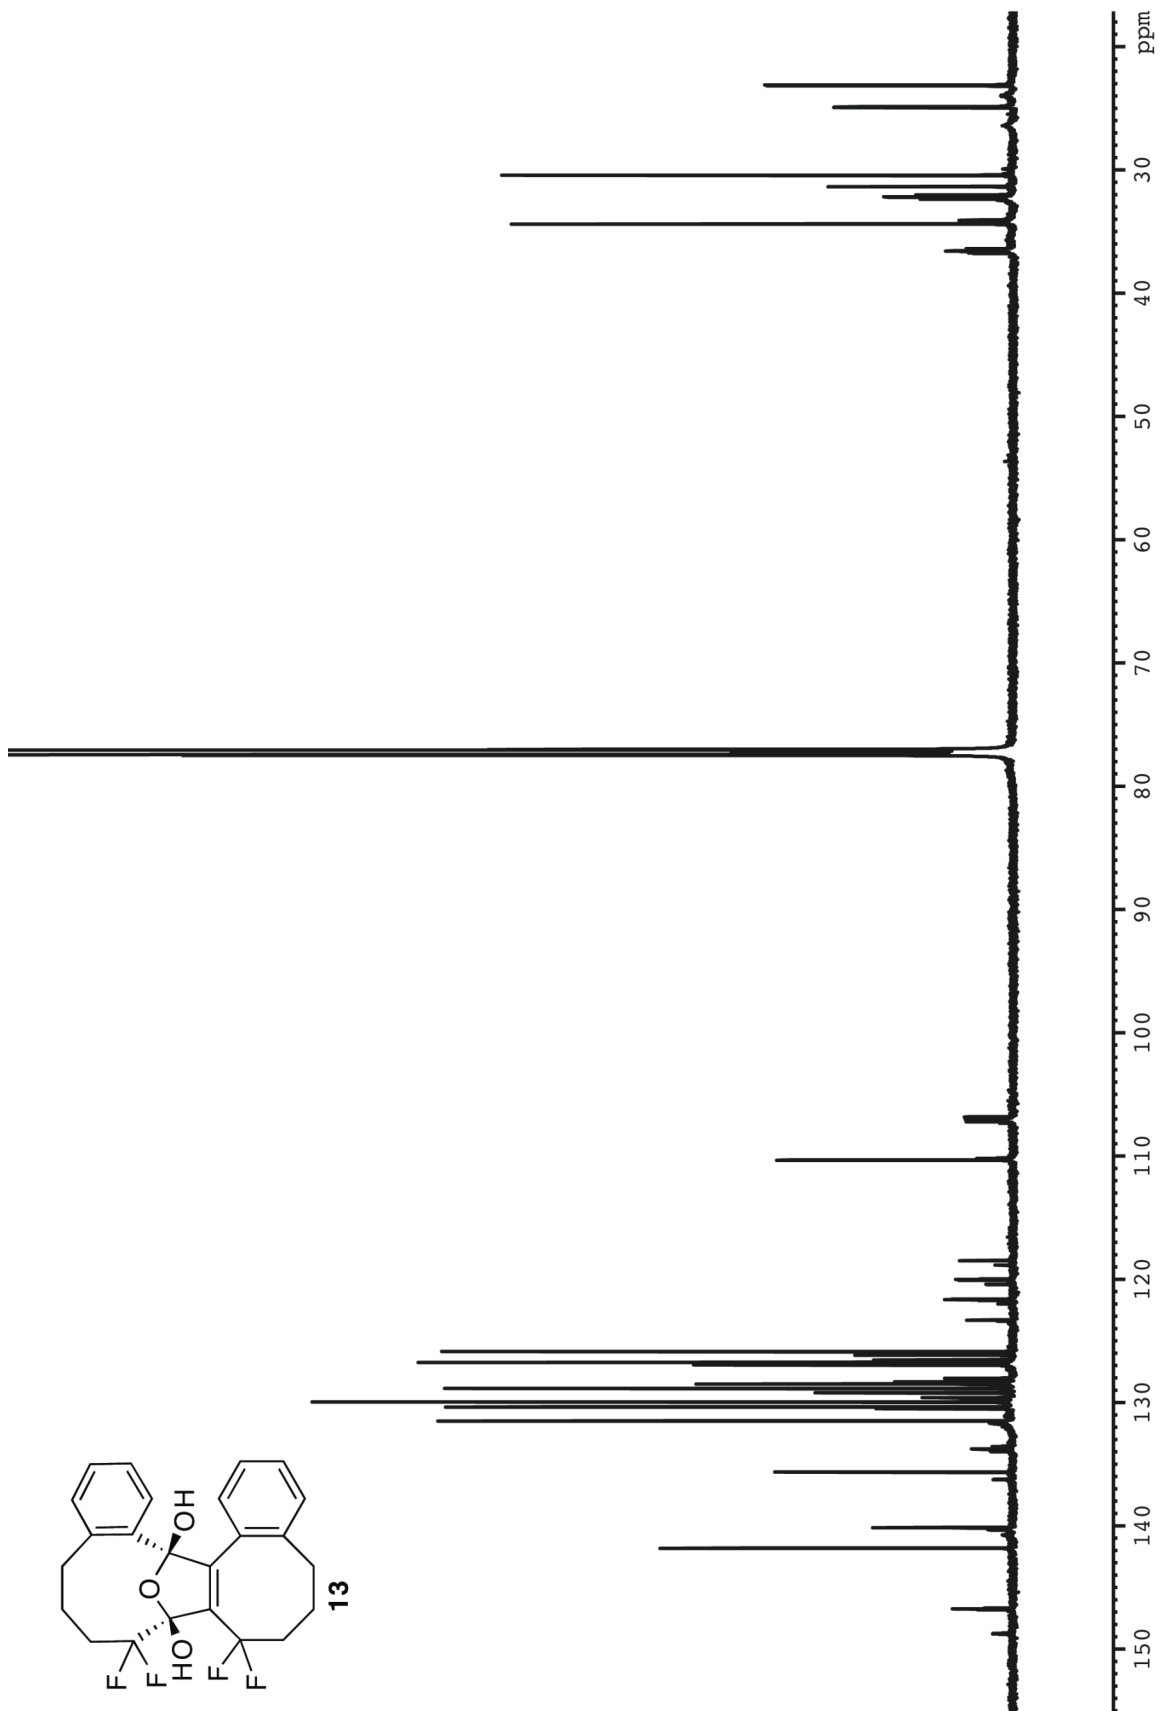



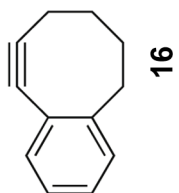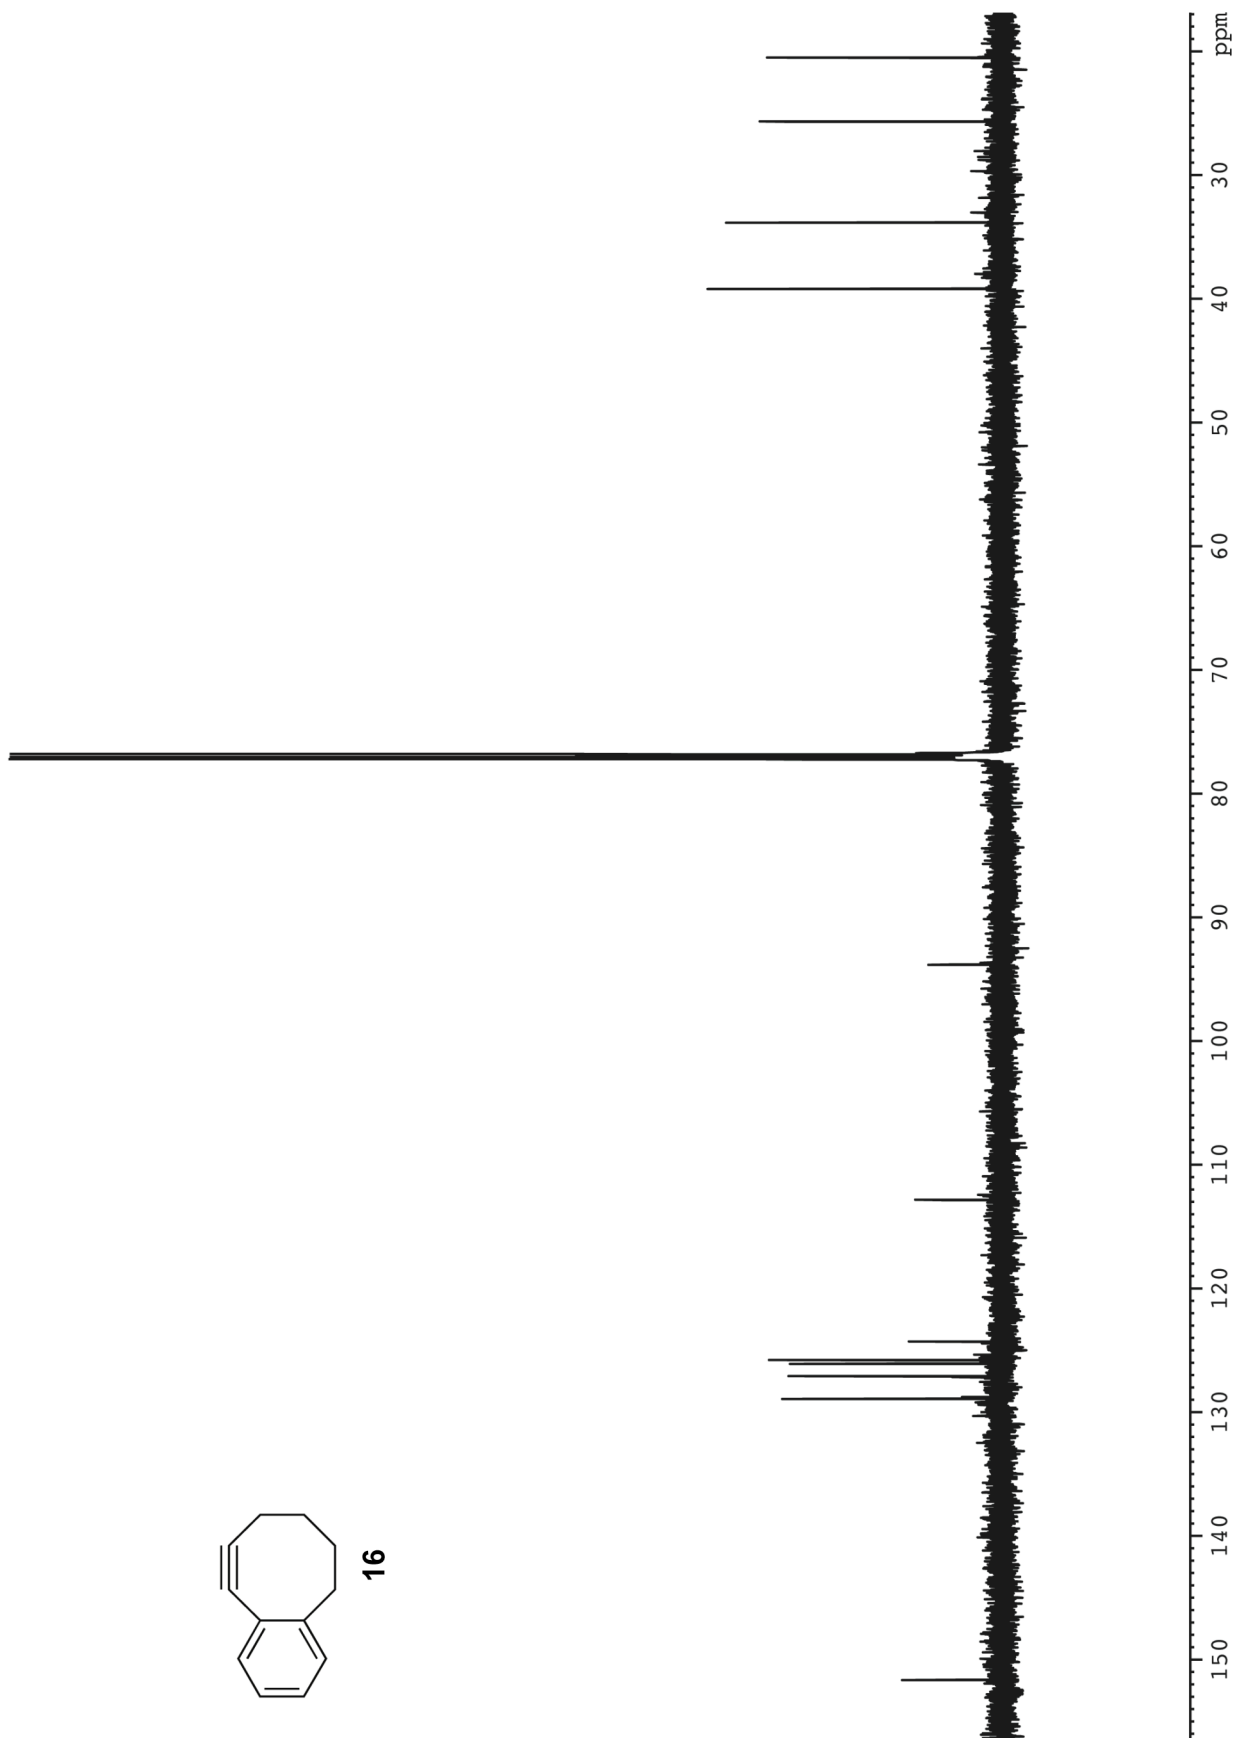

**$^{19}\text{F}$ -NMR of compounds 4-6, 8-14**

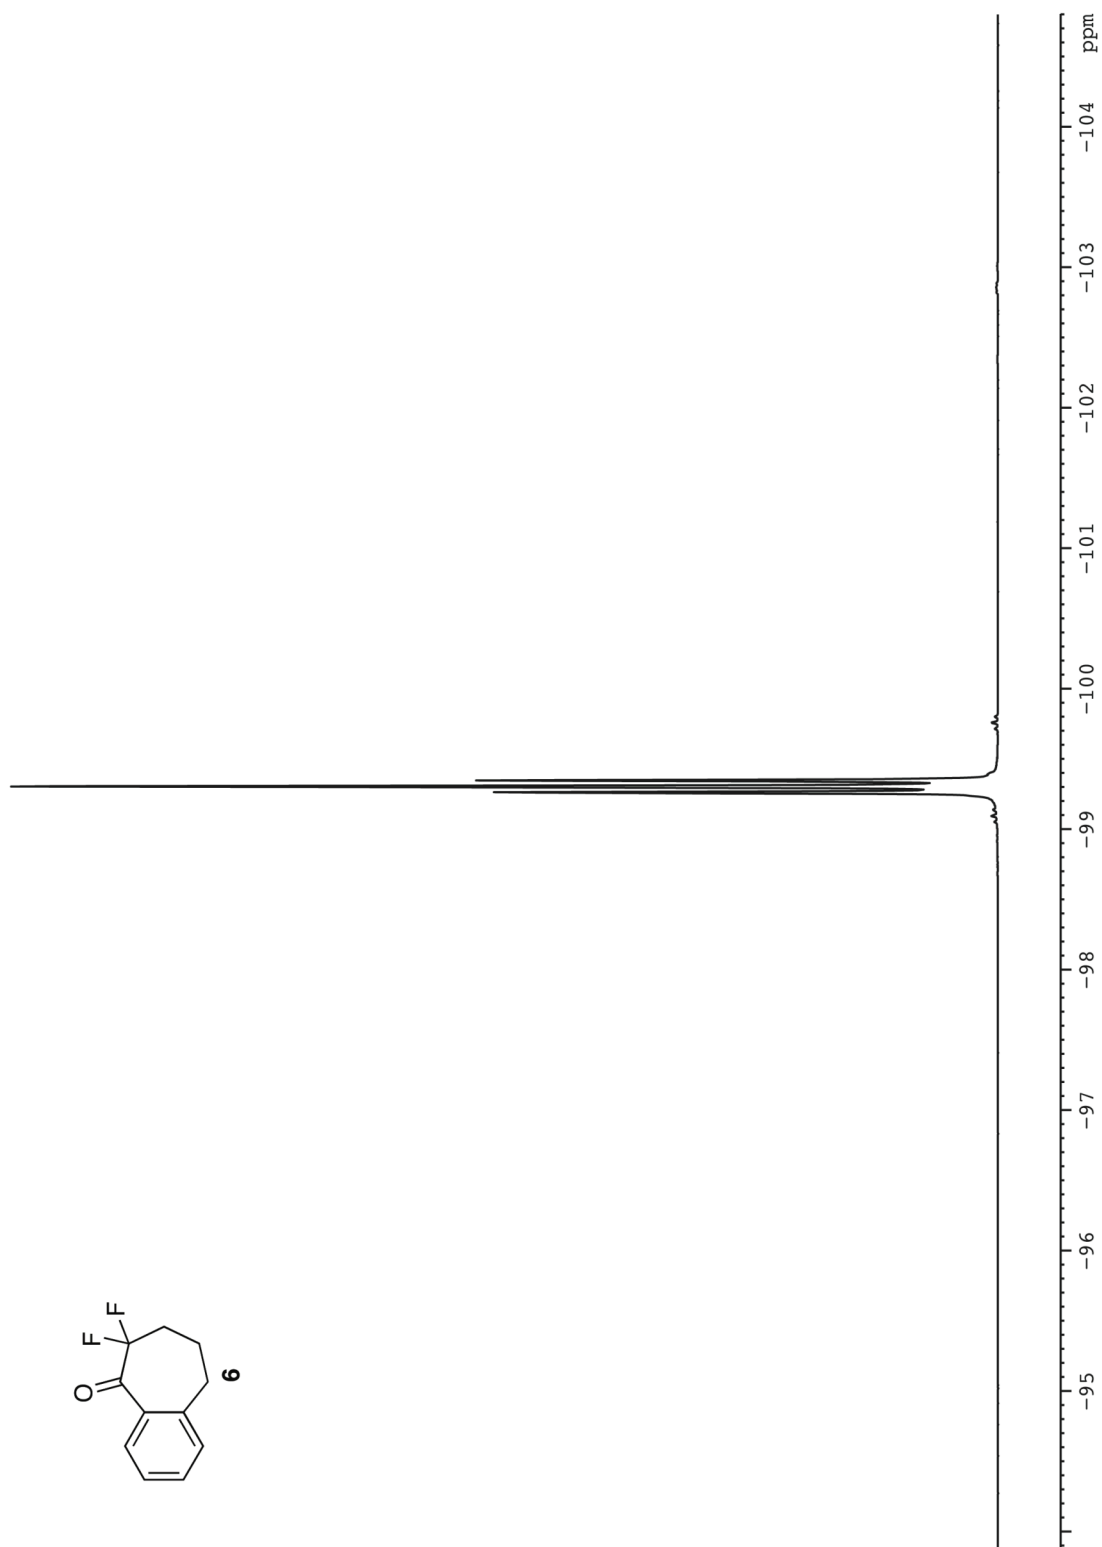

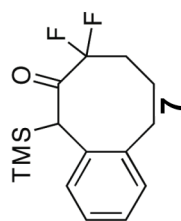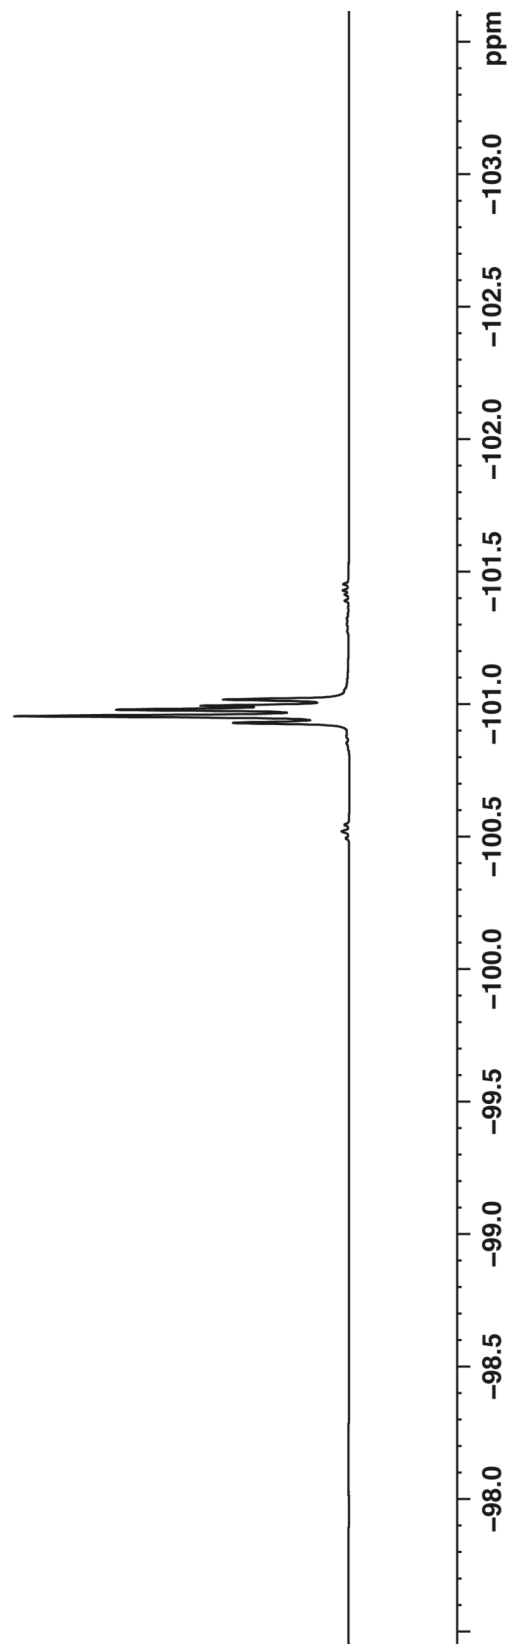

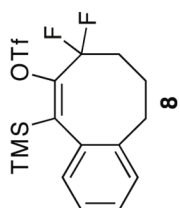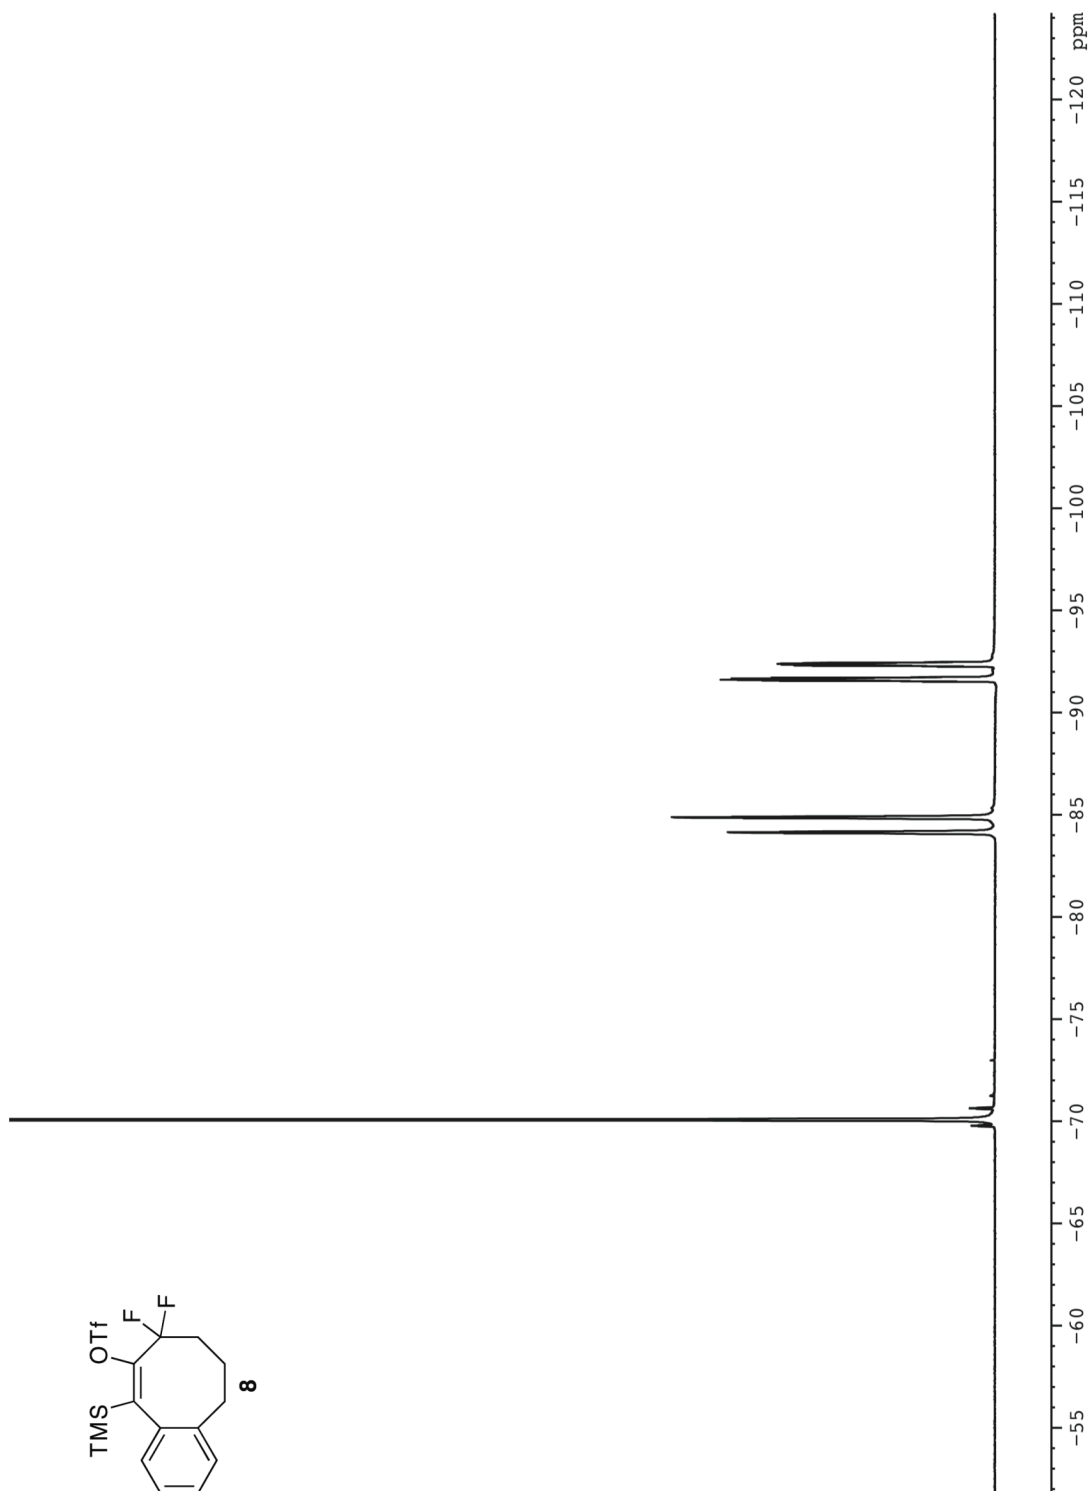



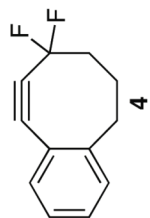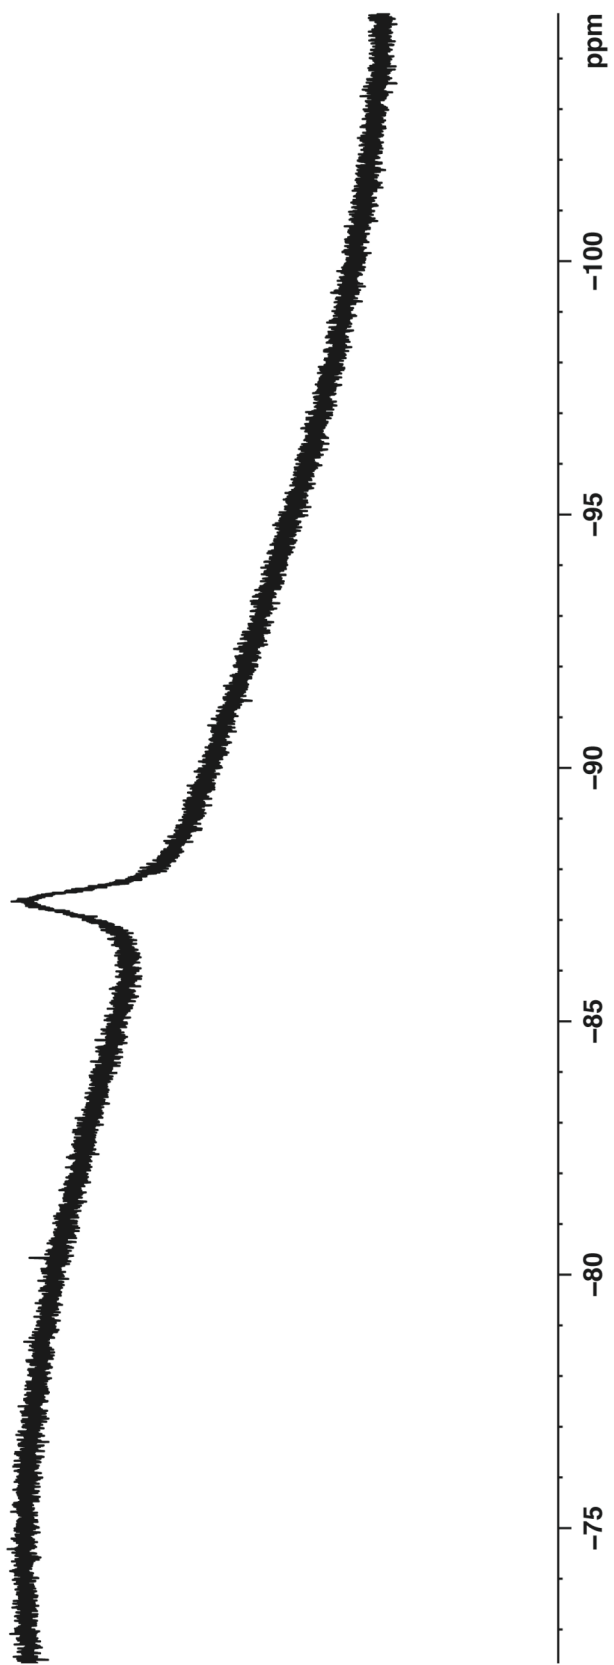

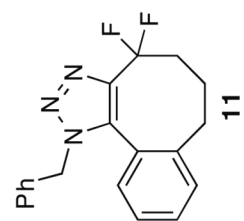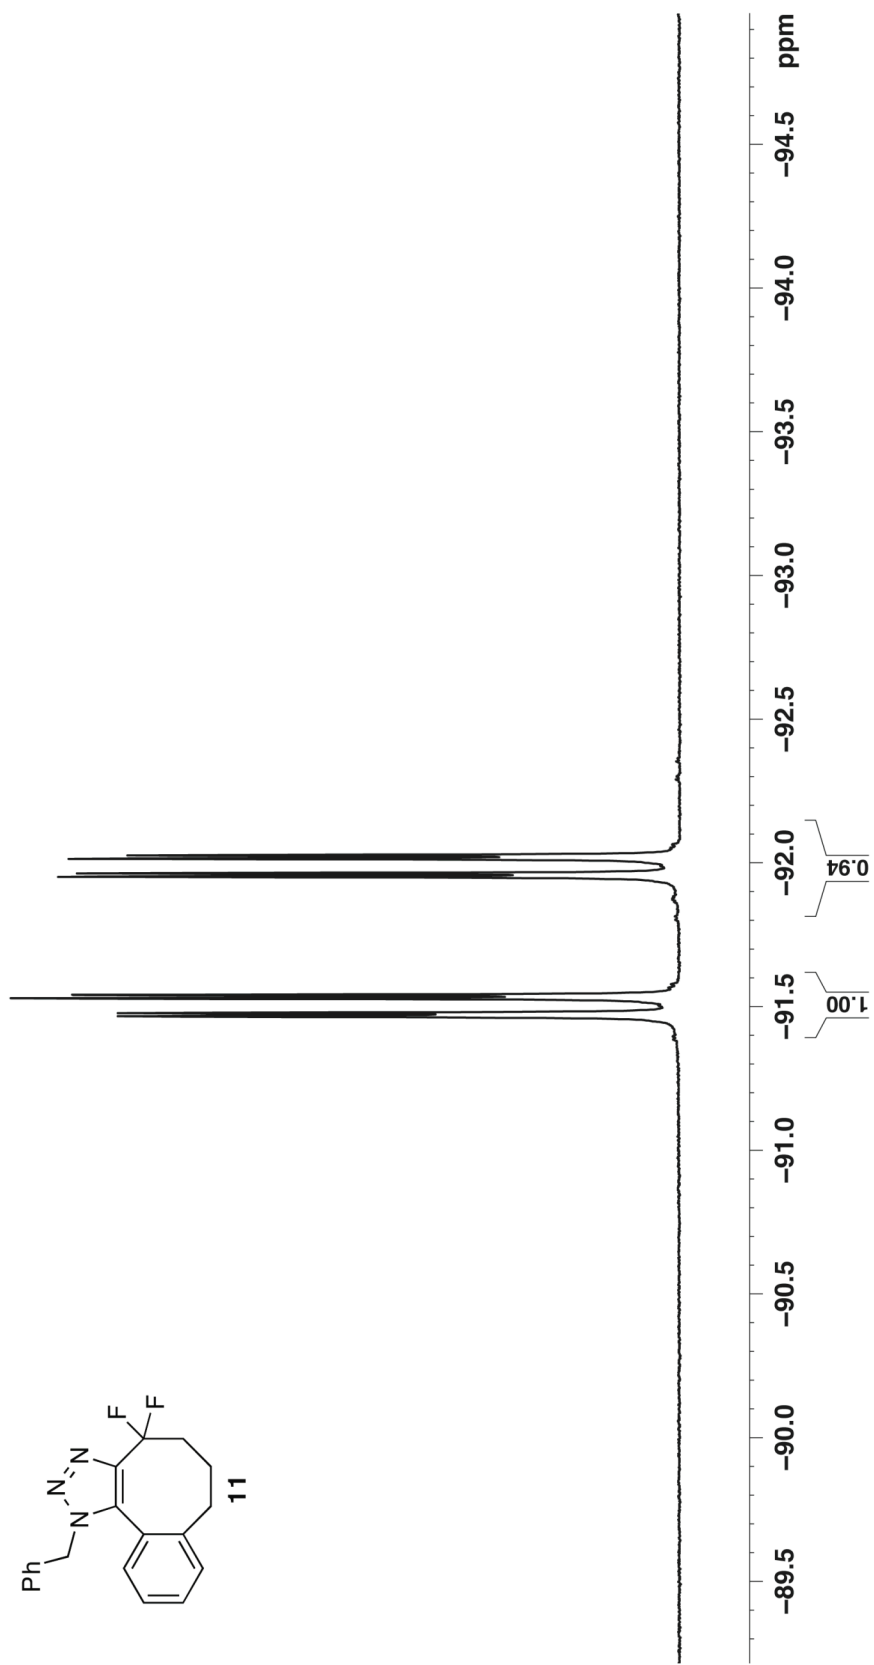

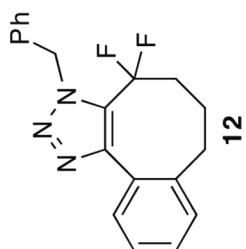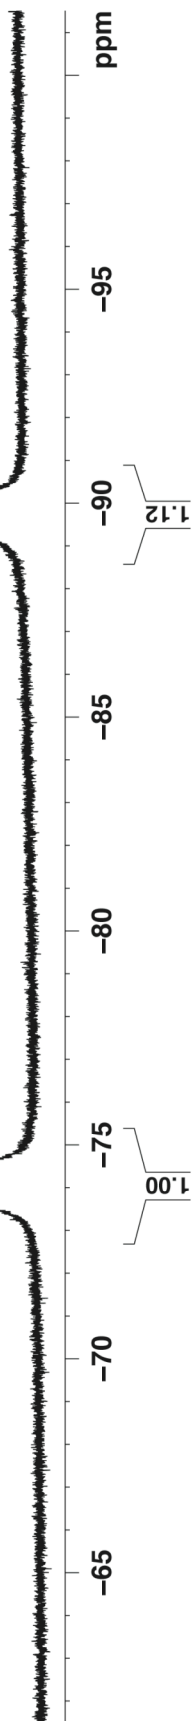

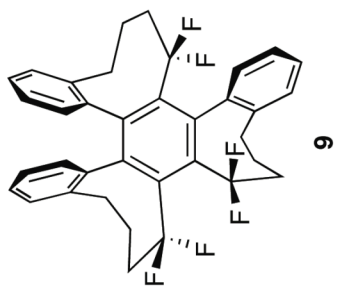

9

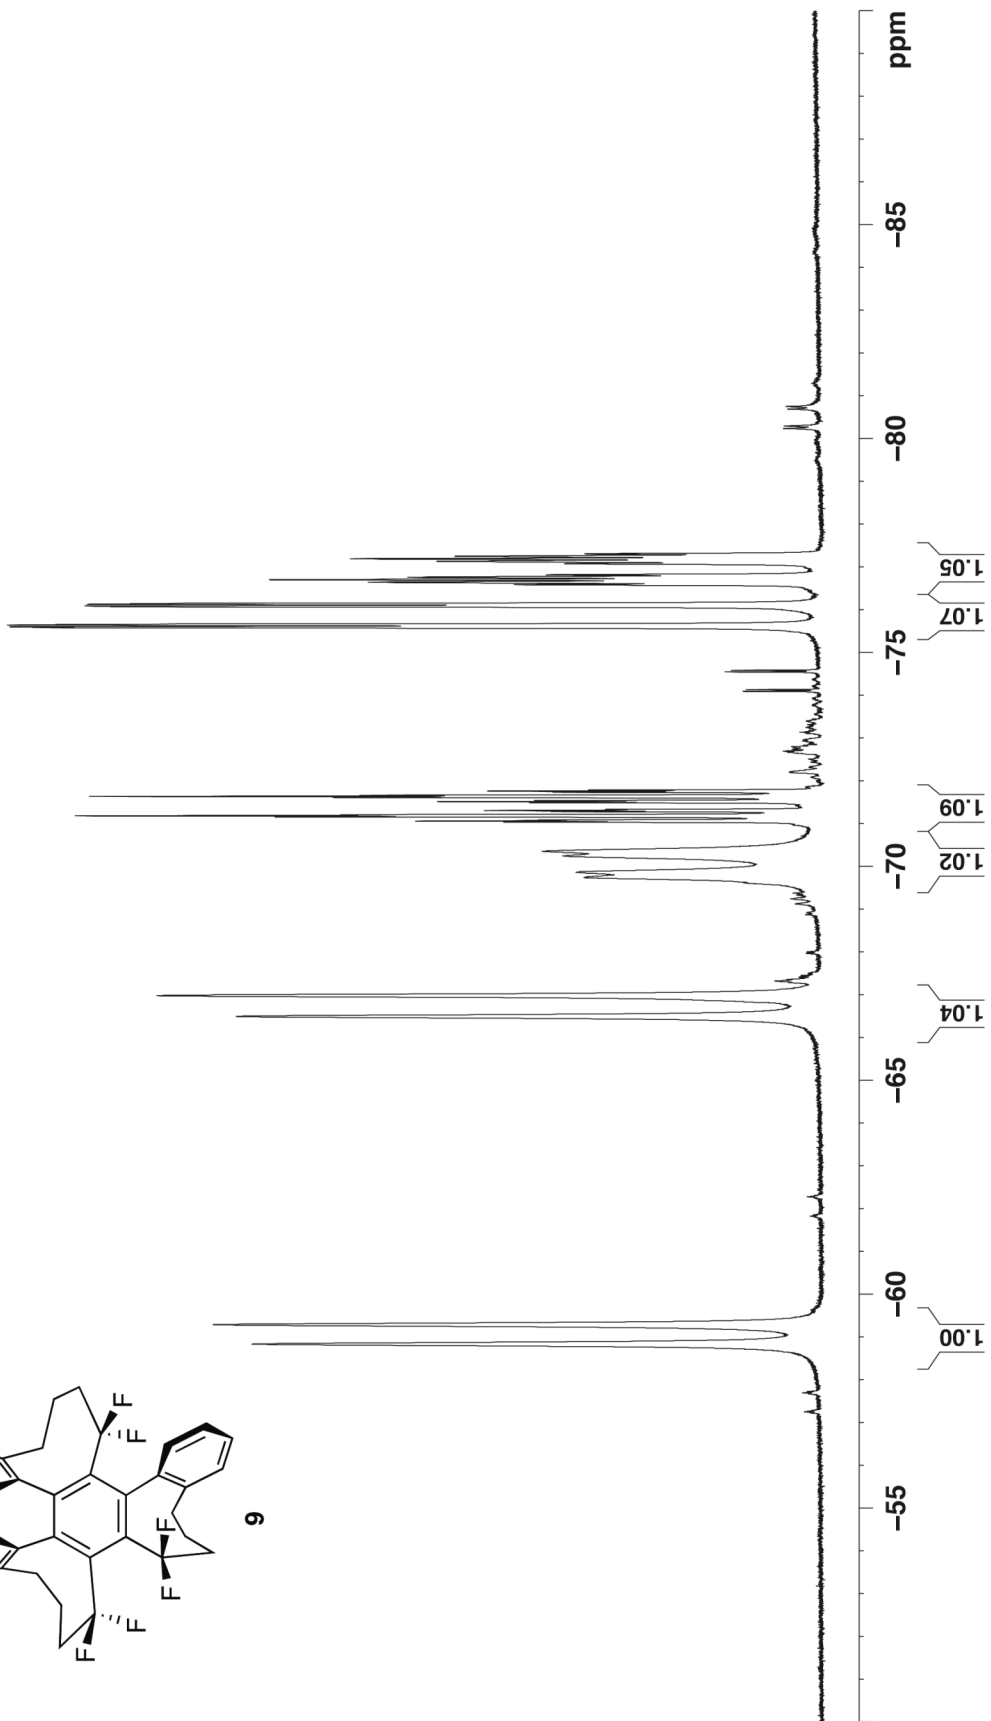

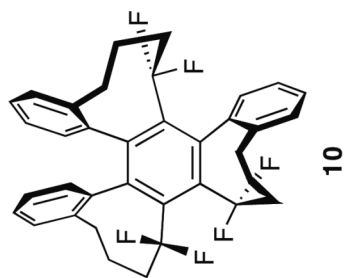

10

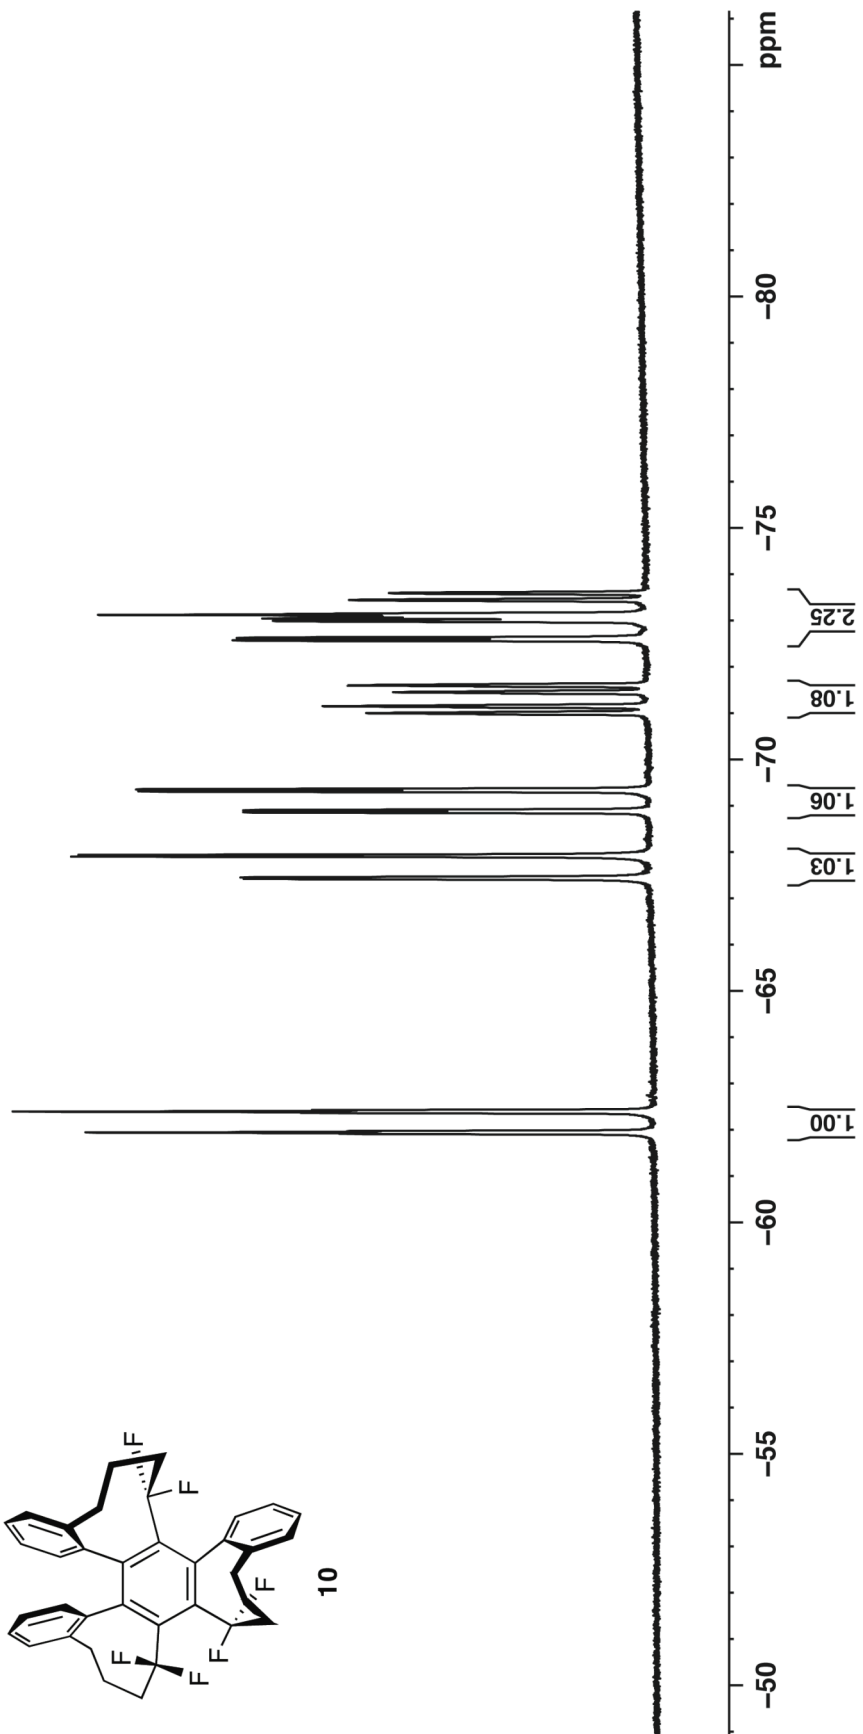





# <sup>1</sup>H-NMR of compounds 19-22, S6-S11

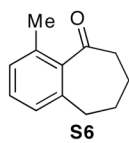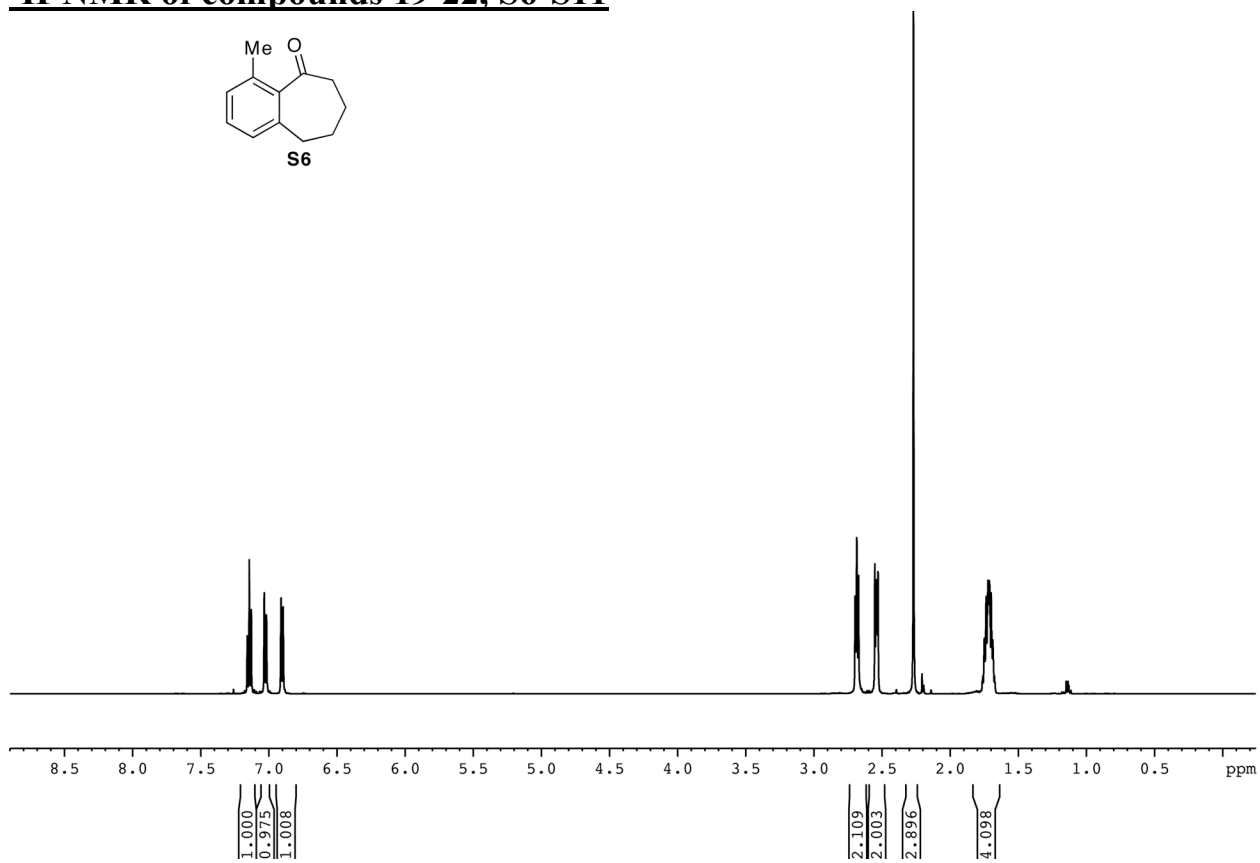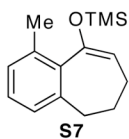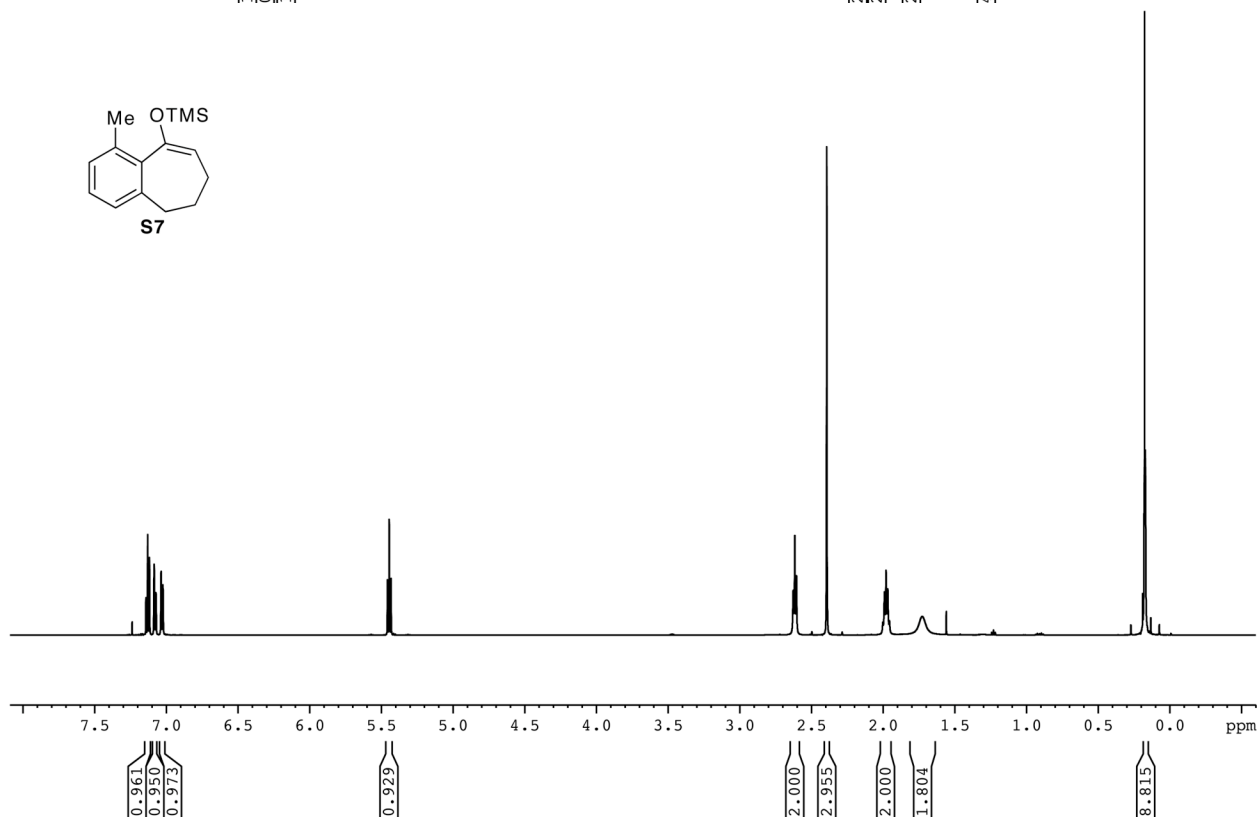



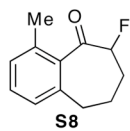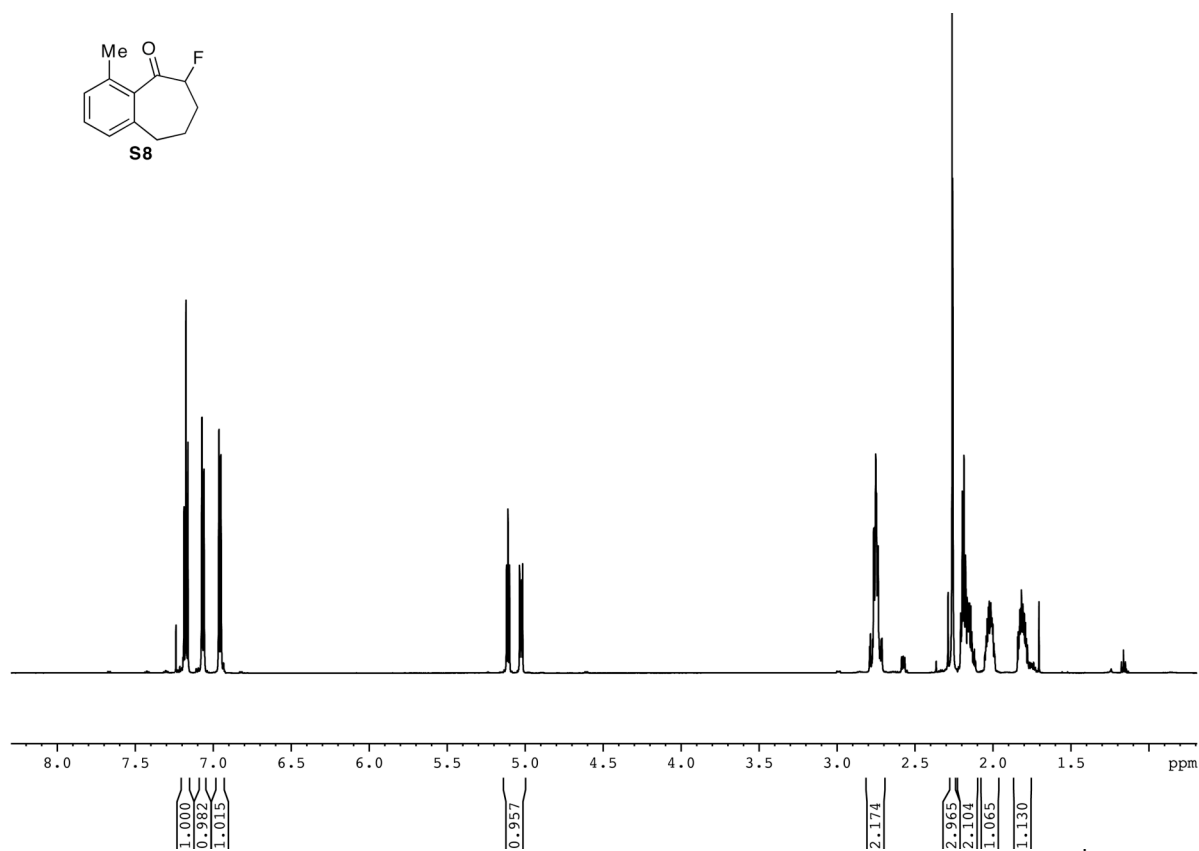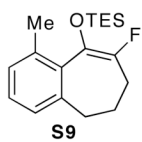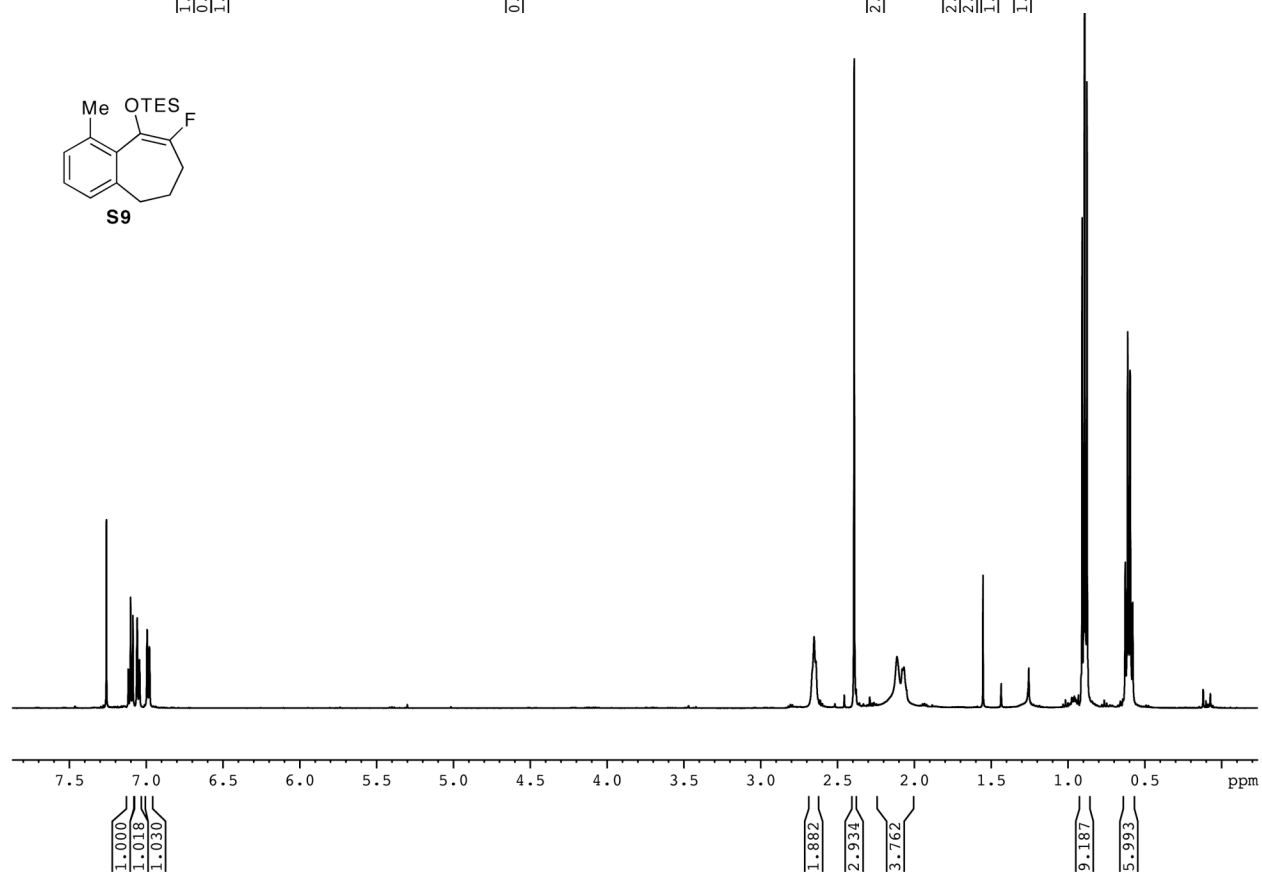

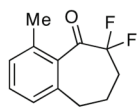

19

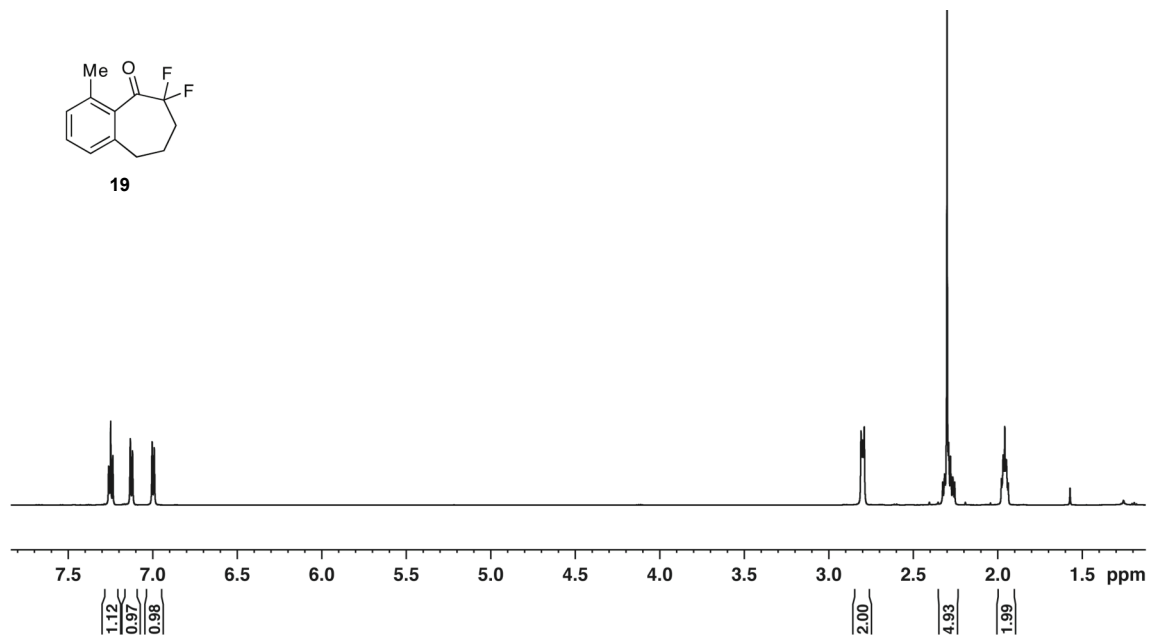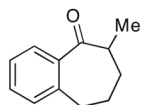

S10

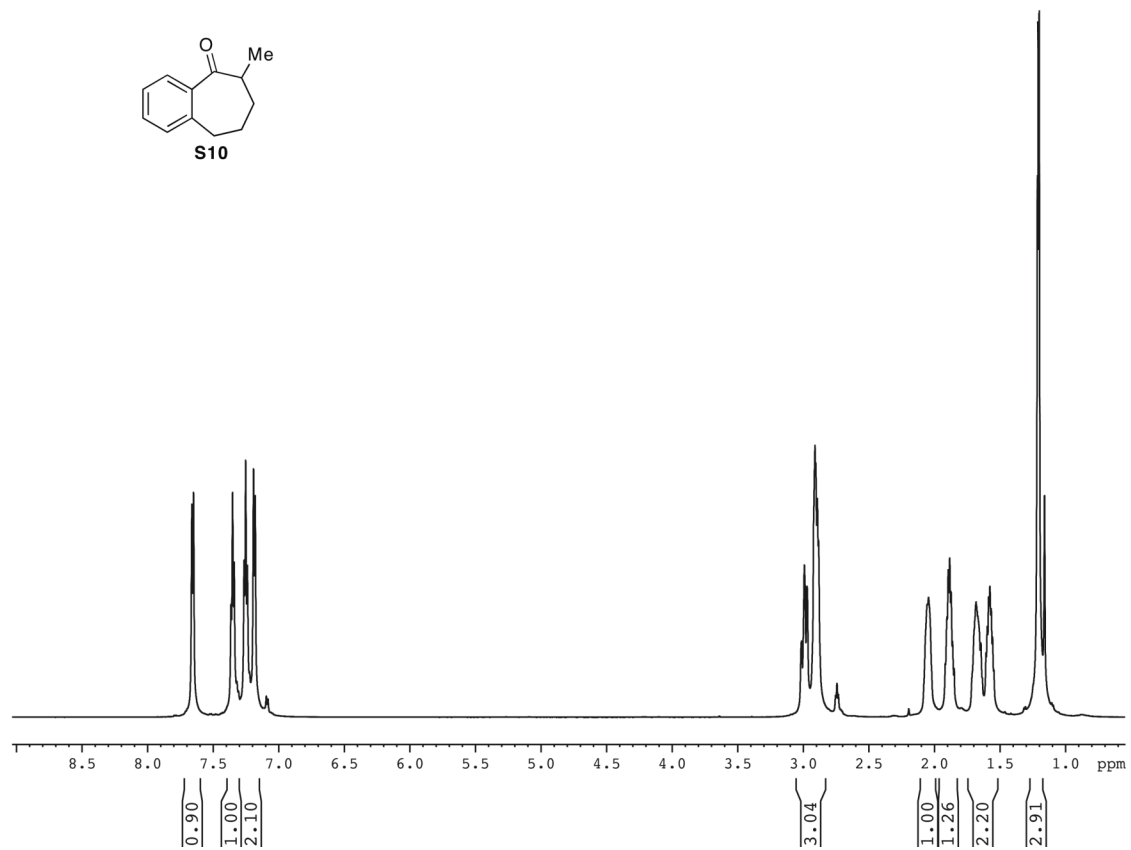

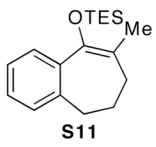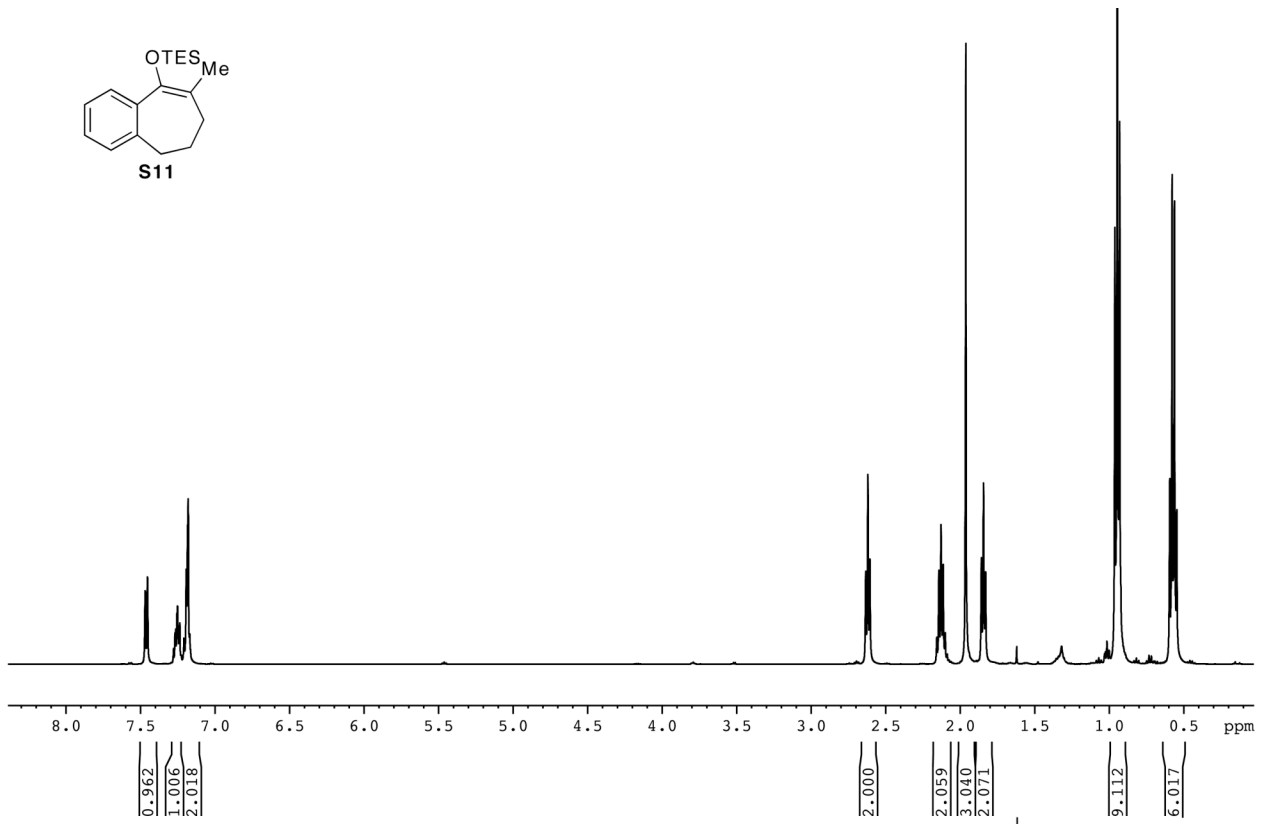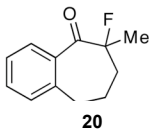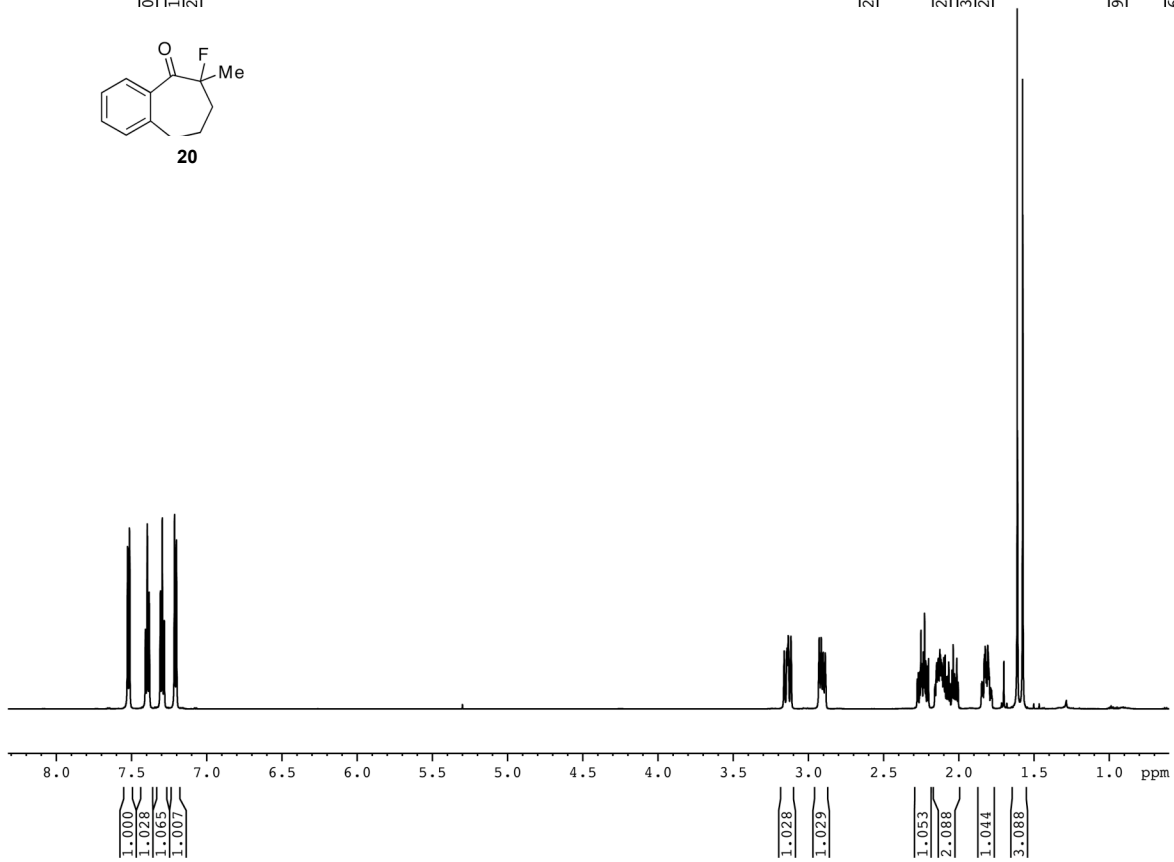

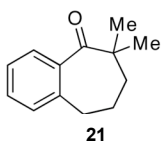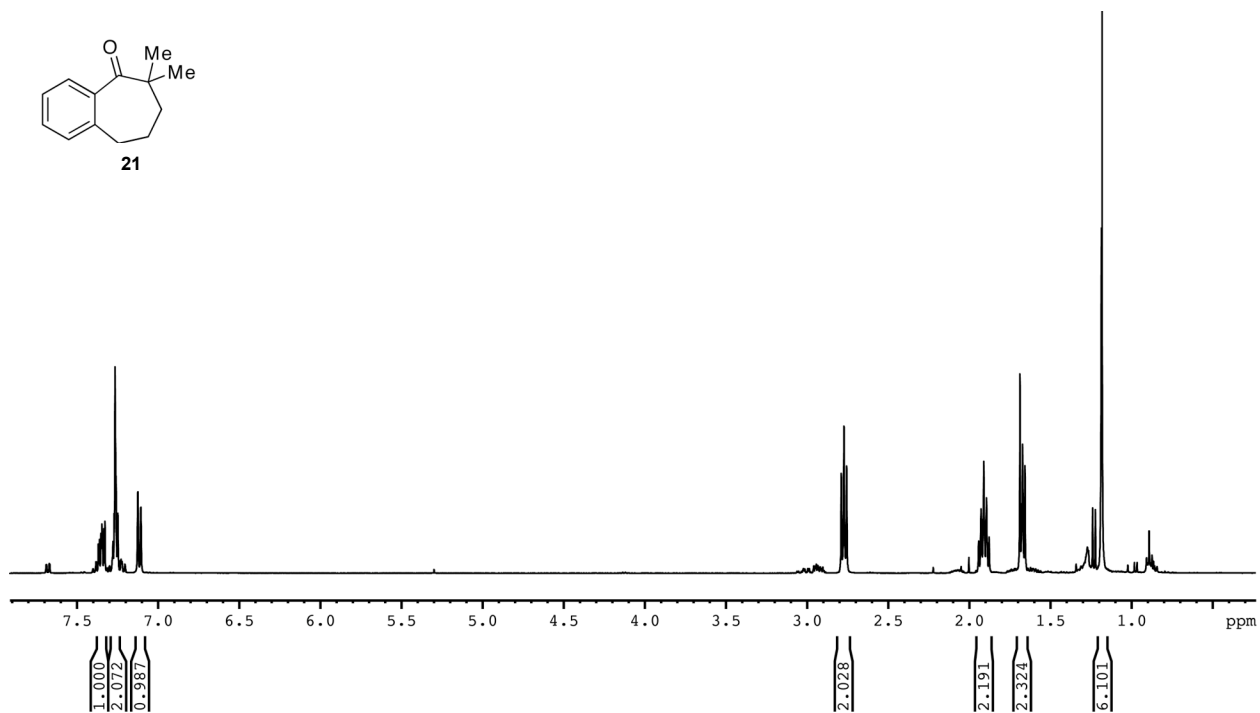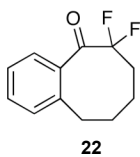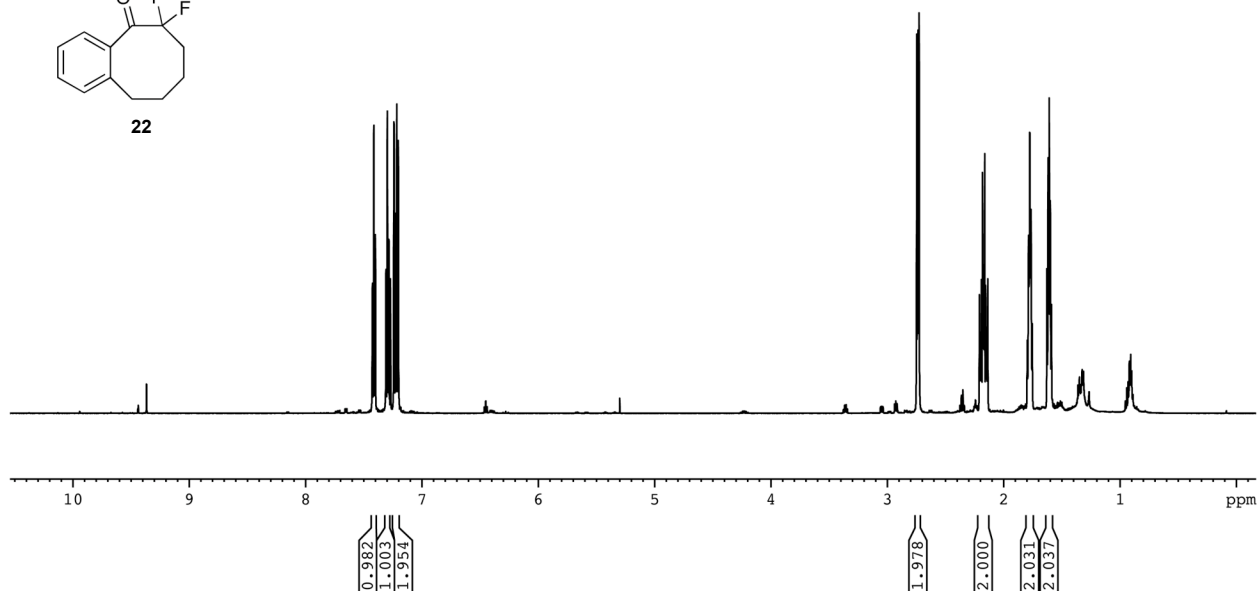

## X-ray crystallography data

### Major Trimer (9)

A colorless prism 0.12 x 0.08 x 0.04 mm in size was mounted on a Cryoloop with Paratone oil. Data were collected in a nitrogen gas stream at 100(2) K using phi and omega scans. Crystal-to-detector distance was 60 mm and exposure time was 5 seconds per frame using a scan width of 1.0°. Data collection was 99.9% complete to 67.00° in  $\theta$ . A total of 12405 reflections were collected covering the indices,  $-10 \leq h \leq 10$ ,  $-15 \leq k \leq 14$ ,  $-14 \leq l \leq 14$ . 4349 reflections were found to be symmetry independent, with an  $R_{\text{int}}$  of 0.0149. Indexing and unit cell refinement indicated a primitive, monoclinic lattice. The space group was found to be P2(1) (No. 4). The data were integrated using the Bruker SAINT software program and scaled using the SADABS software program. Solution by direct methods (SIR-2008) produced a complete heavy-atom phasing model consistent with the proposed structure. All non-hydrogen atoms were refined anisotropically by full-matrix least-squares (SHELXL-97). All hydrogen atoms were placed using a riding model. Their positions were constrained relative to their parent atom using the appropriate HFIX command in SHELXL-97.

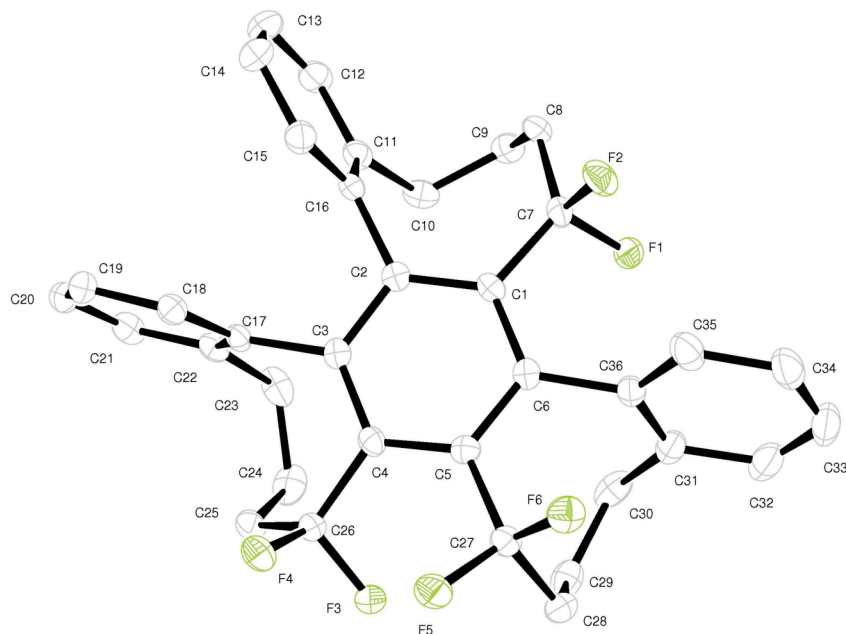

**Figure S12.** X-ray structure of trimer **9** with labeled carbon and fluorine atoms. ORTEPs are shown at 50% probability.

**Table S1.** Crystal data and structure refinement for major trimer (**9**).

|                                   |                                             |                              |
|-----------------------------------|---------------------------------------------|------------------------------|
| Empirical formula                 | C36 H30 F6                                  |                              |
| Formula weight                    | 576.60                                      |                              |
| Temperature                       | 100(2) K                                    |                              |
| Wavelength                        | 1.54178 Å                                   |                              |
| Crystal system                    | Monoclinic                                  |                              |
| Space group                       | P2(1)                                       |                              |
| Unit cell dimensions              | a = 9.0552(4) Å                             | $\alpha = 90^\circ$ .        |
|                                   | b = 12.8869(6) Å                            | $\beta = 103.344(2)^\circ$ . |
|                                   | c = 12.0073(5) Å                            | $\gamma = 90^\circ$ .        |
| Volume                            | 1363.34(10) Å <sup>3</sup>                  |                              |
| Z                                 | 2                                           |                              |
| Density (calculated)              | 1.405 Mg/m <sup>3</sup>                     |                              |
| Absorption coefficient            | 0.916 mm <sup>-1</sup>                      |                              |
| F(000)                            | 600                                         |                              |
| Crystal size                      | 0.12 x 0.08 x 0.04 mm <sup>3</sup>          |                              |
| Crystal color/habit               | colorless prism                             |                              |
| Theta range for data collection   | 3.78 to 68.17°.                             |                              |
| Index ranges                      | -10<=h<=10, -15<=k<=14, -14<=l<=14          |                              |
| Reflections collected             | 12405                                       |                              |
| Independent reflections           | 4349 [R(int) = 0.0149]                      |                              |
| Completeness to theta = 67.00°    | 99.9 %                                      |                              |
| Absorption correction             | Semi-empirical from equivalents             |                              |
| Max. and min. transmission        | 0.9643 and 0.8980                           |                              |
| Refinement method                 | Full-matrix least-squares on F <sup>2</sup> |                              |
| Data / restraints / parameters    | 4349 / 1 / 379                              |                              |
| Goodness-of-fit on F <sup>2</sup> | 1.038                                       |                              |
| Final R indices [I>2sigma(I)]     | R1 = 0.0274, wR2 = 0.0735                   |                              |
| R indices (all data)              | R1 = 0.0282, wR2 = 0.0744                   |                              |
| Absolute structure parameter      | 0.07(7)                                     |                              |
| Largest diff. peak and hole       | 0.247 and -0.132 e.Å <sup>-3</sup>          |                              |

**Table S2.** Atomic coordinates ( $\times 10^4$ ) and equivalent isotropic displacement parameters ( $\text{\AA}^2 \times 10^3$ ) for major trimer (**9**).  $U(\text{eq})$  is defined as one third of the trace of the orthogonalized  $U_{ij}$  tensor.

|       | x        | y       | z        | $U(\text{eq})$ |
|-------|----------|---------|----------|----------------|
| C(1)  | 6239(2)  | 3861(1) | 280(1)   | 17(1)          |
| C(2)  | 6327(2)  | 3431(1) | -776(1)  | 17(1)          |
| C(3)  | 7552(2)  | 2772(1) | -842(1)  | 17(1)          |
| C(4)  | 8631(2)  | 2496(1) | 147(1)   | 18(1)          |
| C(5)  | 8354(2)  | 2758(1) | 1225(1)  | 18(1)          |
| C(6)  | 7221(2)  | 3485(1) | 1297(1)  | 18(1)          |
| C(7)  | 5100(2)  | 4718(1) | 394(1)   | 20(1)          |
| C(8)  | 4213(2)  | 5371(1) | -584(1)  | 22(1)          |
| C(9)  | 5138(2)  | 6080(1) | -1190(2) | 25(1)          |
| C(10) | 6134(2)  | 5496(2) | -1861(2) | 24(1)          |
| C(11) | 5223(2)  | 4600(2) | -2461(1) | 22(1)          |
| C(12) | 4186(2)  | 4759(2) | -3503(1) | 28(1)          |
| C(13) | 3141(2)  | 4002(2) | -3972(2) | 34(1)          |
| C(14) | 3114(2)  | 3070(2) | -3402(2) | 31(1)          |
| C(15) | 4148(2)  | 2899(2) | -2361(1) | 24(1)          |
| C(16) | 5196(2)  | 3657(1) | -1886(1) | 19(1)          |
| C(17) | 7656(2)  | 2411(1) | -2019(1) | 17(1)          |
| C(18) | 6879(2)  | 1536(1) | -2504(1) | 20(1)          |
| C(19) | 6867(2)  | 1255(2) | -3626(1) | 23(1)          |
| C(20) | 7668(2)  | 1832(2) | -4247(1) | 26(1)          |
| C(21) | 8496(2)  | 2682(2) | -3755(1) | 24(1)          |
| C(22) | 8491(2)  | 2994(1) | -2643(1) | 21(1)          |
| C(23) | 9501(2)  | 3856(2) | -2059(2) | 29(1)          |
| C(24) | 10902(2) | 3430(2) | -1178(2) | 33(1)          |
| C(25) | 10871(2) | 2280(2) | -920(2)  | 28(1)          |
| C(26) | 10126(2) | 1971(1) | 44(1)    | 23(1)          |
| C(27) | 9212(2)  | 2249(1) | 2350(1)  | 21(1)          |
| C(28) | 10528(2) | 2846(2) | 3119(1)  | 25(1)          |
| C(29) | 10954(2) | 3902(2) | 2695(2)  | 28(1)          |
| C(30) | 9712(2)  | 4757(2) | 2495(2)  | 29(1)          |
| C(31) | 8382(2)  | 4534(1) | 3025(1)  | 25(1)          |
| C(32) | 8341(3)  | 4959(2) | 4090(2)  | 37(1)          |
| C(33) | 7159(3)  | 4740(2) | 4604(2)  | 42(1)          |
| C(34) | 5993(2)  | 4086(2) | 4059(2)  | 38(1)          |
| C(35) | 6004(2)  | 3678(2) | 2984(2)  | 29(1)          |
| C(36) | 7181(2)  | 3909(1) | 2468(1)  | 22(1)          |
| F(1)  | 5874(1)  | 5429(1) | 1182(1)  | 25(1)          |
| F(2)  | 4033(1)  | 4275(1) | 902(1)   | 28(1)          |
| F(3)  | 11210(1) | 2193(1) | 1030(1)  | 27(1)          |
| F(4)  | 9961(1)  | 913(1)  | 21(1)    | 30(1)          |
| F(5)  | 9674(1)  | 1275(1) | 2129(1)  | 28(1)          |
| F(6)  | 8148(1)  | 2025(1) | 2983(1)  | 25(1)          |

**Table S3.** Bond lengths [ $\text{\AA}$ ] and angles [ $^\circ$ ] for major trimer (**9**).

|                 |            |                  |            |
|-----------------|------------|------------------|------------|
| C(1)-C(2)       | 1.402(2)   | C(19)-H(19)      | 0.9500     |
| C(1)-C(6)       | 1.419(2)   | C(20)-C(21)      | 1.381(3)   |
| C(1)-C(7)       | 1.539(2)   | C(20)-H(20)      | 0.9500     |
| C(2)-C(3)       | 1.414(2)   | C(21)-C(22)      | 1.395(2)   |
| C(2)-C(16)      | 1.510(2)   | C(21)-H(21)      | 0.9500     |
| C(3)-C(4)       | 1.398(2)   | C(22)-C(23)      | 1.506(2)   |
| C(3)-C(17)      | 1.512(2)   | C(23)-C(24)      | 1.553(3)   |
| C(4)-C(5)       | 1.414(2)   | C(23)-H(23A)     | 0.9900     |
| C(4)-C(26)      | 1.544(2)   | C(23)-H(23B)     | 0.9900     |
| C(5)-C(6)       | 1.408(2)   | C(24)-C(25)      | 1.515(3)   |
| C(5)-C(27)      | 1.540(2)   | C(24)-H(24A)     | 0.9900     |
| C(6)-C(36)      | 1.516(2)   | C(24)-H(24B)     | 0.9900     |
| C(7)-F(2)       | 1.3794(19) | C(25)-C(26)      | 1.520(2)   |
| C(7)-F(1)       | 1.3858(19) | C(25)-H(25A)     | 0.9900     |
| C(7)-C(8)       | 1.516(2)   | C(25)-H(25B)     | 0.9900     |
| C(8)-C(9)       | 1.532(2)   | C(26)-F(4)       | 1.371(2)   |
| C(8)-H(8A)      | 0.9900     | C(26)-F(3)       | 1.3815(19) |
| C(8)-H(8B)      | 0.9900     | C(27)-F(5)       | 1.368(2)   |
| C(9)-C(10)      | 1.537(2)   | C(27)-F(6)       | 1.389(2)   |
| C(9)-H(9A)      | 0.9900     | C(27)-C(28)      | 1.535(2)   |
| C(9)-H(9B)      | 0.9900     | C(28)-C(29)      | 1.533(3)   |
| C(10)-C(11)     | 1.503(2)   | C(28)-H(28A)     | 0.9900     |
| C(10)-H(10A)    | 0.9900     | C(28)-H(28B)     | 0.9900     |
| C(10)-H(10B)    | 0.9900     | C(29)-C(30)      | 1.554(3)   |
| C(11)-C(12)     | 1.395(2)   | C(29)-H(29A)     | 0.9900     |
| C(11)-C(16)     | 1.401(2)   | C(29)-H(29B)     | 0.9900     |
| C(12)-C(13)     | 1.386(3)   | C(30)-C(31)      | 1.514(3)   |
| C(12)-H(12)     | 0.9500     | C(30)-H(30A)     | 0.9900     |
| C(13)-C(14)     | 1.385(3)   | C(30)-H(30B)     | 0.9900     |
| C(13)-H(13)     | 0.9500     | C(31)-C(36)      | 1.394(3)   |
| C(14)-C(15)     | 1.396(2)   | C(31)-C(32)      | 1.399(3)   |
| C(14)-H(14)     | 0.9500     | C(32)-C(33)      | 1.383(3)   |
| C(15)-C(16)     | 1.388(2)   | C(32)-H(32)      | 0.9500     |
| C(15)-H(15)     | 0.9500     | C(33)-C(34)      | 1.391(4)   |
| C(17)-C(18)     | 1.384(2)   | C(33)-H(33)      | 0.9500     |
| C(17)-C(22)     | 1.400(2)   | C(34)-C(35)      | 1.396(3)   |
| C(18)-C(19)     | 1.393(2)   | C(34)-H(34)      | 0.9500     |
| C(18)-H(18)     | 0.9500     | C(35)-C(36)      | 1.383(2)   |
| C(19)-C(20)     | 1.373(3)   | C(35)-H(35)      | 0.9500     |
| C(2)-C(1)-C(6)  | 119.23(14) | C(5)-C(6)-C(36)  | 118.09(14) |
| C(2)-C(1)-C(7)  | 122.86(14) | C(1)-C(6)-C(36)  | 122.05(14) |
| C(6)-C(1)-C(7)  | 117.90(13) | F(2)-C(7)-F(1)   | 105.50(12) |
| C(1)-C(2)-C(3)  | 119.76(14) | F(2)-C(7)-C(8)   | 105.79(13) |
| C(1)-C(2)-C(16) | 123.63(14) | F(1)-C(7)-C(8)   | 104.84(14) |
| C(3)-C(2)-C(16) | 116.58(13) | F(2)-C(7)-C(1)   | 107.14(14) |
| C(4)-C(3)-C(2)  | 120.59(14) | F(1)-C(7)-C(1)   | 106.94(12) |
| C(4)-C(3)-C(17) | 122.25(14) | C(8)-C(7)-C(1)   | 125.17(14) |
| C(2)-C(3)-C(17) | 117.14(14) | C(7)-C(8)-C(9)   | 116.69(13) |
| C(3)-C(4)-C(5)  | 118.68(14) | C(7)-C(8)-H(8A)  | 108.1      |
| C(3)-C(4)-C(26) | 119.79(14) | C(9)-C(8)-H(8A)  | 108.1      |
| C(5)-C(4)-C(26) | 121.45(14) | C(7)-C(8)-H(8B)  | 108.1      |
| C(6)-C(5)-C(4)  | 120.04(15) | C(9)-C(8)-H(8B)  | 108.1      |
| C(6)-C(5)-C(27) | 117.15(14) | H(8A)-C(8)-H(8B) | 107.3      |
| C(4)-C(5)-C(27) | 122.77(14) | C(8)-C(9)-C(10)  | 114.10(14) |
| C(5)-C(6)-C(1)  | 119.66(14) | C(8)-C(9)-H(9A)  | 108.7      |



|                     |            |                     |            |
|---------------------|------------|---------------------|------------|
| C(10)-C(9)-H(9A)    | 108.7      | C(24)-C(25)-C(26)   | 116.37(15) |
| C(8)-C(9)-H(9B)     | 108.7      | C(24)-C(25)-H(25A)  | 108.2      |
| C(10)-C(9)-H(9B)    | 108.7      | C(26)-C(25)-H(25A)  | 108.2      |
| H(9A)-C(9)-H(9B)    | 107.6      | C(24)-C(25)-H(25B)  | 108.2      |
| C(11)-C(10)-C(9)    | 107.64(13) | C(26)-C(25)-H(25B)  | 108.2      |
| C(11)-C(10)-H(10A)  | 110.2      | H(25A)-C(25)-H(25B) | 107.3      |
| C(9)-C(10)-H(10A)   | 110.2      | F(4)-C(26)-F(3)     | 105.95(13) |
| C(11)-C(10)-H(10B)  | 110.2      | F(4)-C(26)-C(25)    | 108.11(14) |
| C(9)-C(10)-H(10B)   | 110.2      | F(3)-C(26)-C(25)    | 104.26(14) |
| H(10A)-C(10)-H(10B) | 108.5      | F(4)-C(26)-C(4)     | 110.10(14) |
| C(12)-C(11)-C(16)   | 118.98(17) | F(3)-C(26)-C(4)     | 107.63(13) |
| C(12)-C(11)-C(10)   | 119.89(17) | C(25)-C(26)-C(4)    | 119.83(15) |
| C(16)-C(11)-C(10)   | 120.06(14) | F(5)-C(27)-F(6)     | 101.29(13) |
| C(13)-C(12)-C(11)   | 121.08(18) | F(5)-C(27)-C(28)    | 110.29(13) |
| C(13)-C(12)-H(12)   | 119.5      | F(6)-C(27)-C(28)    | 108.35(13) |
| C(11)-C(12)-H(12)   | 119.5      | F(5)-C(27)-C(5)     | 109.57(13) |
| C(14)-C(13)-C(12)   | 119.87(16) | F(6)-C(27)-C(5)     | 107.21(12) |
| C(14)-C(13)-H(13)   | 120.1      | C(28)-C(27)-C(5)    | 118.65(14) |
| C(12)-C(13)-H(13)   | 120.1      | C(29)-C(28)-C(27)   | 117.64(14) |
| C(13)-C(14)-C(15)   | 119.63(18) | C(29)-C(28)-H(28A)  | 107.9      |
| C(13)-C(14)-H(14)   | 120.2      | C(27)-C(28)-H(28A)  | 107.9      |
| C(15)-C(14)-H(14)   | 120.2      | C(29)-C(28)-H(28B)  | 107.9      |
| C(16)-C(15)-C(14)   | 120.69(18) | C(27)-C(28)-H(28B)  | 107.9      |
| C(16)-C(15)-H(15)   | 119.7      | H(28A)-C(28)-H(28B) | 107.2      |
| C(14)-C(15)-H(15)   | 119.7      | C(28)-C(29)-C(30)   | 116.87(15) |
| C(15)-C(16)-C(11)   | 119.74(15) | C(28)-C(29)-H(29A)  | 108.1      |
| C(15)-C(16)-C(2)    | 119.14(15) | C(30)-C(29)-H(29A)  | 108.1      |
| C(11)-C(16)-C(2)    | 121.08(15) | C(28)-C(29)-H(29B)  | 108.1      |
| C(18)-C(17)-C(22)   | 119.83(14) | C(30)-C(29)-H(29B)  | 108.1      |
| C(18)-C(17)-C(3)    | 120.58(14) | H(29A)-C(29)-H(29B) | 107.3      |
| C(22)-C(17)-C(3)    | 119.52(15) | C(31)-C(30)-C(29)   | 114.75(15) |
| C(17)-C(18)-C(19)   | 120.53(15) | C(31)-C(30)-H(30A)  | 108.6      |
| C(17)-C(18)-H(18)   | 119.7      | C(29)-C(30)-H(30A)  | 108.6      |
| C(19)-C(18)-H(18)   | 119.7      | C(31)-C(30)-H(30B)  | 108.6      |
| C(20)-C(19)-C(18)   | 119.84(16) | C(29)-C(30)-H(30B)  | 108.6      |
| C(20)-C(19)-H(19)   | 120.1      | H(30A)-C(30)-H(30B) | 107.6      |
| C(18)-C(19)-H(19)   | 120.1      | C(36)-C(31)-C(32)   | 118.87(18) |
| C(19)-C(20)-C(21)   | 120.00(15) | C(36)-C(31)-C(30)   | 121.07(15) |
| C(19)-C(20)-H(20)   | 120.0      | C(32)-C(31)-C(30)   | 120.06(18) |
| C(21)-C(20)-H(20)   | 120.0      | C(33)-C(32)-C(31)   | 120.9(2)   |
| C(20)-C(21)-C(22)   | 121.10(16) | C(33)-C(32)-H(32)   | 119.5      |
| C(20)-C(21)-H(21)   | 119.4      | C(31)-C(32)-H(32)   | 119.5      |
| C(22)-C(21)-H(21)   | 119.4      | C(32)-C(33)-C(34)   | 119.73(18) |
| C(21)-C(22)-C(17)   | 118.62(16) | C(32)-C(33)-H(33)   | 120.1      |
| C(21)-C(22)-C(23)   | 121.51(15) | C(34)-C(33)-H(33)   | 120.1      |
| C(17)-C(22)-C(23)   | 119.45(15) | C(33)-C(34)-C(35)   | 119.78(19) |
| C(22)-C(23)-C(24)   | 111.72(16) | C(33)-C(34)-H(34)   | 120.1      |
| C(22)-C(23)-H(23A)  | 109.3      | C(35)-C(34)-H(34)   | 120.1      |
| C(24)-C(23)-H(23A)  | 109.3      | C(36)-C(35)-C(34)   | 120.3(2)   |
| C(22)-C(23)-H(23B)  | 109.3      | C(36)-C(35)-H(35)   | 119.9      |
| C(24)-C(23)-H(23B)  | 109.3      | C(34)-C(35)-H(35)   | 119.9      |
| H(23A)-C(23)-H(23B) | 107.9      | C(35)-C(36)-C(31)   | 120.35(16) |
| C(25)-C(24)-C(23)   | 115.71(15) | C(35)-C(36)-C(6)    | 121.61(17) |
| C(25)-C(24)-H(24A)  | 108.4      | C(31)-C(36)-C(6)    | 118.03(15) |
| C(23)-C(24)-H(24A)  | 108.4      |                     |            |
| C(25)-C(24)-H(24B)  | 108.4      |                     |            |
| C(23)-C(24)-H(24B)  | 108.4      |                     |            |
| H(24A)-C(24)-H(24B) | 107.4      |                     |            |

---

Symmetry transformations used to generate equivalent atoms:

**Table S4.** Anisotropic displacement parameters ( $\text{\AA}^2 \times 10^3$ ) for major trimer (**9**). The anisotropic displacement factor exponent takes the form:  $-2p^2 [ h^2 a^* 2U^{11} + \dots + 2 h k a^* b^* U^{12} ]$

|       | $U^{11}$ | $U^{22}$ | $U^{33}$ | $U^{23}$ | $U^{13}$ | $U^{12}$ |
|-------|----------|----------|----------|----------|----------|----------|
| C(1)  | 17(1)    | 14(1)    | 22(1)    | 0(1)     | 7(1)     | 0(1)     |
| C(2)  | 18(1)    | 14(1)    | 19(1)    | 1(1)     | 5(1)     | -3(1)    |
| C(3)  | 19(1)    | 14(1)    | 19(1)    | 0(1)     | 7(1)     | -3(1)    |
| C(4)  | 20(1)    | 14(1)    | 22(1)    | -2(1)    | 6(1)     | 0(1)     |
| C(5)  | 17(1)    | 16(1)    | 20(1)    | 0(1)     | 3(1)     | -2(1)    |
| C(6)  | 20(1)    | 15(1)    | 19(1)    | 0(1)     | 7(1)     | -2(1)    |
| C(7)  | 21(1)    | 19(1)    | 21(1)    | -4(1)    | 7(1)     | 1(1)     |
| C(8)  | 19(1)    | 21(1)    | 25(1)    | -3(1)    | 4(1)     | 6(1)     |
| C(9)  | 27(1)    | 17(1)    | 29(1)    | 2(1)     | 1(1)     | 2(1)     |
| C(10) | 21(1)    | 21(1)    | 31(1)    | 8(1)     | 6(1)     | 1(1)     |
| C(11) | 21(1)    | 24(1)    | 23(1)    | 1(1)     | 9(1)     | 3(1)     |
| C(12) | 30(1)    | 34(1)    | 20(1)    | 7(1)     | 7(1)     | 10(1)    |
| C(13) | 30(1)    | 49(1)    | 20(1)    | -1(1)    | -2(1)    | 7(1)     |
| C(14) | 25(1)    | 37(1)    | 29(1)    | -10(1)   | -1(1)    | -2(1)    |
| C(15) | 22(1)    | 24(1)    | 25(1)    | -3(1)    | 6(1)     | -1(1)    |
| C(16) | 16(1)    | 22(1)    | 19(1)    | -2(1)    | 7(1)     | 3(1)     |
| C(17) | 19(1)    | 15(1)    | 18(1)    | 1(1)     | 5(1)     | 4(1)     |
| C(18) | 19(1)    | 19(1)    | 22(1)    | 1(1)     | 7(1)     | 0(1)     |
| C(19) | 23(1)    | 23(1)    | 23(1)    | -6(1)    | 2(1)     | 1(1)     |
| C(20) | 27(1)    | 33(1)    | 16(1)    | 0(1)     | 5(1)     | 9(1)     |
| C(21) | 27(1)    | 26(1)    | 23(1)    | 8(1)     | 13(1)    | 6(1)     |
| C(22) | 19(1)    | 17(1)    | 27(1)    | 3(1)     | 8(1)     | 2(1)     |
| C(23) | 29(1)    | 20(1)    | 45(1)    | -5(1)    | 20(1)    | -7(1)    |
| C(24) | 27(1)    | 41(1)    | 34(1)    | -10(1)   | 11(1)    | -16(1)   |
| C(25) | 16(1)    | 38(1)    | 29(1)    | -9(1)    | 5(1)     | 4(1)     |
| C(26) | 23(1)    | 21(1)    | 22(1)    | -5(1)    | 0(1)     | 5(1)     |
| C(27) | 22(1)    | 19(1)    | 22(1)    | 0(1)     | 4(1)     | 2(1)     |
| C(28) | 26(1)    | 26(1)    | 21(1)    | -1(1)    | 0(1)     | 3(1)     |
| C(29) | 29(1)    | 31(1)    | 24(1)    | -4(1)    | 6(1)     | -8(1)    |
| C(30) | 37(1)    | 22(1)    | 23(1)    | 3(1)     | -3(1)    | -10(1)   |
| C(31) | 38(1)    | 17(1)    | 19(1)    | 0(1)     | 1(1)     | 6(1)     |
| C(32) | 54(1)    | 27(1)    | 23(1)    | -4(1)    | -4(1)    | 12(1)    |
| C(33) | 65(1)    | 43(1)    | 19(1)    | -2(1)    | 8(1)     | 26(1)    |
| C(34) | 48(1)    | 45(1)    | 25(1)    | 9(1)     | 18(1)    | 23(1)    |
| C(35) | 35(1)    | 28(1)    | 28(1)    | 6(1)     | 13(1)    | 10(1)    |
| C(36) | 30(1)    | 18(1)    | 17(1)    | 4(1)     | 6(1)     | 9(1)     |
| F(1)  | 30(1)    | 20(1)    | 23(1)    | -5(1)    | 0(1)     | 8(1)     |
| F(2)  | 24(1)    | 34(1)    | 30(1)    | 2(1)     | 14(1)    | 5(1)     |
| F(3)  | 20(1)    | 36(1)    | 24(1)    | -7(1)    | 0(1)     | 6(1)     |
| F(4)  | 35(1)    | 20(1)    | 34(1)    | -3(1)    | 4(1)     | 8(1)     |
| F(5)  | 34(1)    | 19(1)    | 30(1)    | 3(1)     | 3(1)     | 7(1)     |
| F(6)  | 28(1)    | 25(1)    | 24(1)    | 7(1)     | 7(1)     | -1(1)    |

**Table S5.** Hydrogen coordinates ( $\times 10^4$ ) and isotropic displacement parameters ( $\text{\AA}^2 \times 10^3$ ) for major trimer (**9**).

|        | x     | y    | z     | U(eq) |
|--------|-------|------|-------|-------|
| H(8A)  | 3493  | 5808 | -285  | 26    |
| H(8B)  | 3605  | 4898 | -1162 | 26    |
| H(9A)  | 5797  | 6527 | -611  | 30    |
| H(9B)  | 4431  | 6538 | -1725 | 30    |
| H(10A) | 6430  | 5965 | -2426 | 29    |
| H(10B) | 7069  | 5240 | -1332 | 29    |
| H(12)  | 4197  | 5397 | -3897 | 33    |
| H(13)  | 2445  | 4121 | -4684 | 41    |
| H(14)  | 2394  | 2550 | -3717 | 38    |
| H(15)  | 4136  | 2258 | -1973 | 28    |
| H(18)  | 6348  | 1124 | -2068 | 24    |
| H(19)  | 6307  | 665  | -3961 | 28    |
| H(20)  | 7653  | 1646 | -5015 | 31    |
| H(21)  | 9079  | 3061 | -4180 | 29    |
| H(23A) | 8913  | 4316 | -1662 | 35    |
| H(23B) | 9849  | 4273 | -2641 | 35    |
| H(24A) | 11821 | 3576 | -1466 | 40    |
| H(24B) | 11001 | 3817 | -452  | 40    |
| H(25A) | 11929 | 2022 | -730  | 33    |
| H(25B) | 10333 | 1920 | -1626 | 33    |
| H(28A) | 10274 | 2954 | 3870  | 30    |
| H(28B) | 11440 | 2397 | 3252  | 30    |
| H(29A) | 11266 | 3790 | 1966  | 34    |
| H(29B) | 11851 | 4168 | 3257  | 34    |
| H(30A) | 10184 | 5419 | 2810  | 35    |
| H(30B) | 9324  | 4851 | 1660  | 35    |
| H(32)  | 9137  | 5405 | 4464  | 44    |
| H(33)  | 7144  | 5034 | 5326  | 51    |
| H(34)  | 5193  | 3917 | 4418  | 45    |
| H(35)  | 5199  |      |       |       |

## Minor Trimer (10)

A colorless rod 0.20 x 0.20 x 0.20 mm in size was mounted on a Cryoloop with Paratone oil. Data were collected in a nitrogen gas stream at 100(2) K using phi and omega scans. Crystal-to-detector distance was 60 mm and exposure time was 5 seconds per frame using a scan width of 1.0°. Data collection was 97.5% complete to 67.00° in  $\theta$ . A total of 46641 reflections were collected covering the indices,  $-13 \leq h \leq 13$ ,  $-13 \leq k \leq 13$ ,  $-26 \leq l \leq 29$ . 9620 reflections were found to be symmetry independent, with an  $R_{\text{int}}$  of 0.0356. Indexing and unit cell refinement indicated a primitive, triclinic lattice. The space group was found to be P-1 (No. 2). The data were integrated using the Bruker SAINT software program and scaled using the SADABS software program. Solution by direct methods (SIR-2008) produced a complete heavy-atom phasing model consistent with the proposed structure. All non-hydrogen atoms were refined anisotropically by full-matrix least-squares (SHELXL-97). All hydrogen atoms were placed using a riding model. Their positions were constrained relative to their parent atom using the appropriate HFIX command in SHELXL-97.

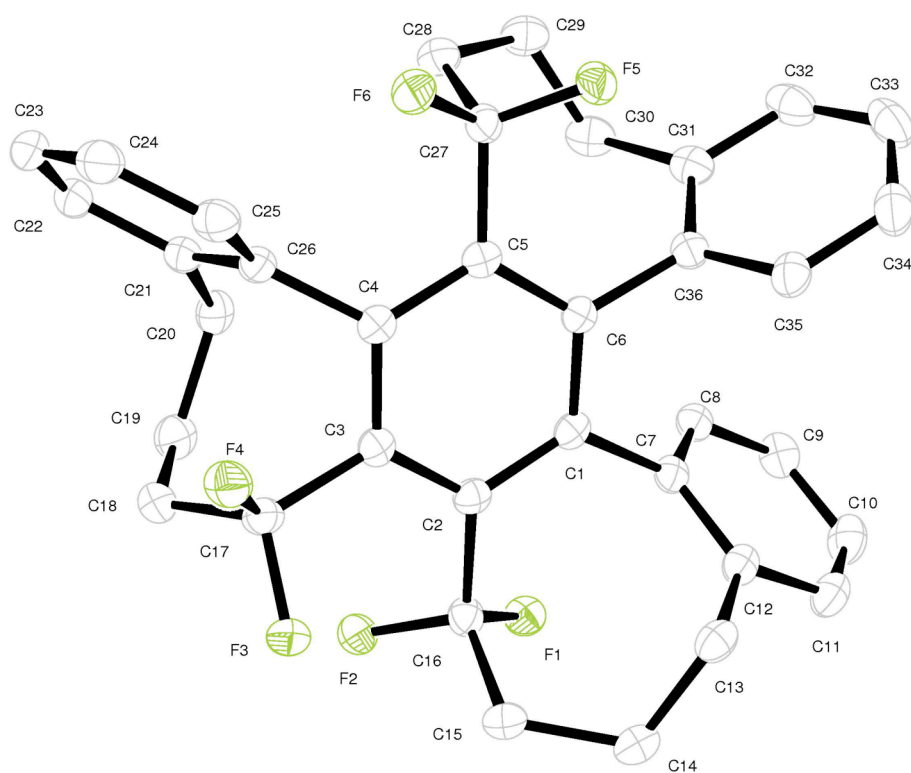

**Figure S13.** X-ray structure of trimer **10** with carbon and fluorine atoms labeled. Shown are ORTEPs with 50% probability.

**Table S6.** Crystal data and structure refinement for minor trimer (**10**).

|                                   |                                             |                               |
|-----------------------------------|---------------------------------------------|-------------------------------|
| Empirical formula                 | C36 H30 F6                                  |                               |
| Formula weight                    | 576.60                                      |                               |
| Temperature                       | 100(2) K                                    |                               |
| Wavelength                        | 1.54178 Å                                   |                               |
| Crystal system                    | Triclinic                                   |                               |
| Space group                       | P-1                                         |                               |
| Unit cell dimensions              | a = 10.9610(4) Å                            | $\alpha = 90.207(2)^\circ$ .  |
|                                   | b = 11.2443(4) Å                            | $\beta = 100.731(2)^\circ$ .  |
|                                   | c = 24.9515(9) Å                            | $\gamma = 115.162(2)^\circ$ . |
| Volume                            | 2722.88(17) Å <sup>3</sup>                  |                               |
| Z                                 | 4                                           |                               |
| Density (calculated)              | 1.407 Mg/m <sup>3</sup>                     |                               |
| Absorption coefficient            | 0.917 mm <sup>-1</sup>                      |                               |
| F(000)                            | 1200                                        |                               |
| Crystal size                      | 0.20 x 0.20 x 0.20 mm <sup>3</sup>          |                               |
| Crystal color/habit               | colorless rod                               |                               |
| Theta range for data collection   | 3.62 to 68.10°.                             |                               |
| Index ranges                      | -13<=h<=13, -13<=k<=13, -26<=l<=29          |                               |
| Reflections collected             | 46641                                       |                               |
| Independent reflections           | 9620 [R(int) = 0.0356]                      |                               |
| Completeness to theta = 67.00°    | 97.5 %                                      |                               |
| Absorption correction             | Semi-empirical from equivalents             |                               |
| Max. and min. transmission        | 0.8378 and 0.8378                           |                               |
| Refinement method                 | Full-matrix least-squares on F <sup>2</sup> |                               |
| Data / restraints / parameters    | 9620 / 0 / 803                              |                               |
| Goodness-of-fit on F <sup>2</sup> | 1.028                                       |                               |
| Final R indices [I>2sigma(I)]     | R1 = 0.0428, wR2 = 0.1070                   |                               |
| R indices (all data)              | R1 = 0.0464, wR2 = 0.1100                   |                               |
| Largest diff. peak and hole       | 0.931 and -0.549 e.Å <sup>-3</sup>          |                               |

**Table S7.** Atomic coordinates ( $\times 10^4$ ) and equivalent isotropic displacement parameters ( $\text{\AA}^2 \times 10^3$ ) for minor trimer (**10**).  $U(\text{eq})$  is defined as one third of the trace of the orthogonalized  $U_{ij}$  tensor.

|       | x        | y        | z       | $U(\text{eq})$ |
|-------|----------|----------|---------|----------------|
| C(1)  | 8284(2)  | 8473(2)  | 5894(1) | 18(1)          |
| C(2)  | 7833(2)  | 9349(2)  | 6101(1) | 19(1)          |
| C(3)  | 8217(2)  | 9753(2)  | 6668(1) | 19(1)          |
| C(4)  | 9188(2)  | 9429(2)  | 7013(1) | 18(1)          |
| C(5)  | 9618(2)  | 8537(2)  | 6803(1) | 18(1)          |
| C(6)  | 9131(2)  | 8033(2)  | 6250(1) | 17(1)          |
| C(7)  | 7932(2)  | 7981(2)  | 5299(1) | 20(1)          |
| C(8)  | 9002(2)  | 8321(2)  | 5016(1) | 22(1)          |
| C(9)  | 8753(2)  | 7881(2)  | 4471(1) | 27(1)          |
| C(10) | 7413(2)  | 7065(2)  | 4201(1) | 31(1)          |
| C(11) | 6351(2)  | 6724(2)  | 4478(1) | 28(1)          |
| C(12) | 6580(2)  | 7176(2)  | 5026(1) | 21(1)          |
| C(13) | 5349(2)  | 6860(2)  | 5285(1) | 24(1)          |
| C(14) | 4770(2)  | 7891(2)  | 5181(1) | 26(1)          |
| C(15) | 5416(2)  | 9095(2)  | 5603(1) | 24(1)          |
| C(16) | 6977(2)  | 9875(2)  | 5697(1) | 21(1)          |
| C(17) | 7661(2)  | 10576(2) | 6954(1) | 23(1)          |
| C(18) | 8565(2)  | 12064(2) | 7083(1) | 28(1)          |
| C(19) | 9897(2)  | 12705(2) | 6862(1) | 29(1)          |
| C(20) | 10983(2) | 12157(2) | 7041(1) | 24(1)          |
| C(21) | 10823(2) | 11525(2) | 7569(1) | 22(1)          |
| C(22) | 11522(2) | 12284(2) | 8069(1) | 27(1)          |
| C(23) | 11273(2) | 11764(2) | 8558(1) | 31(1)          |
| C(24) | 10296(2) | 10473(2) | 8555(1) | 30(1)          |
| C(25) | 9608(2)  | 9704(2)  | 8065(1) | 25(1)          |
| C(26) | 9882(2)  | 10209(2) | 7568(1) | 20(1)          |
| C(27) | 10696(2) | 8196(2)  | 7168(1) | 21(1)          |
| C(28) | 12178(2) | 9163(2)  | 7180(1) | 26(1)          |
| C(29) | 12824(2) | 8943(2)  | 6718(1) | 29(1)          |
| C(30) | 12006(2) | 8772(2)  | 6129(1) | 28(1)          |
| C(31) | 10877(2) | 7386(2)  | 5969(1) | 24(1)          |
| C(32) | 11200(2) | 6396(2)  | 5794(1) | 32(1)          |
| C(33) | 10225(2) | 5102(2)  | 5677(1) | 37(1)          |
| C(34) | 8880(2)  | 4768(2)  | 5723(1) | 34(1)          |
| C(35) | 8532(2)  | 5738(2)  | 5890(1) | 25(1)          |
| C(36) | 9526(2)  | 7038(2)  | 6023(1) | 20(1)          |
| C(37) | 5823(2)  | 5746(2)  | 8269(1) | 21(1)          |
| C(38) | 5041(2)  | 6466(2)  | 8270(1) | 22(1)          |
| C(39) | 5225(2)  | 7243(2)  | 8752(1) | 22(1)          |
| C(40) | 6179(2)  | 7289(2)  | 9223(1) | 26(1)          |
| C(41) | 7101(2)  | 6727(2)  | 9196(1) | 32(1)          |
| C(42) | 6907(2)  | 5940(2)  | 8719(1) | 25(1)          |
| C(43) | 5592(2)  | 4735(2)  | 7817(1) | 21(1)          |
| C(44) | 5130(2)  | 3421(2)  | 7931(1) | 23(1)          |
| C(45) | 5030(2)  | 2458(2)  | 7554(1) | 27(1)          |
| C(46) | 5408(2)  | 2807(2)  | 7058(1) | 31(1)          |
| C(47) | 5856(2)  | 4107(2)  | 6939(1) | 29(1)          |
| C(48) | 5947(2)  | 5085(2)  | 7311(1) | 24(1)          |
| C(49) | 6275(2)  | 6457(2)  | 7151(1) | 28(1)          |
| C(50) | 4928(2)  | 6549(2)  | 6899(1) | 29(1)          |
| C(51) | 3765(2)  | 5835(2)  | 7200(1) | 26(1)          |

|        |          |          |          |       |
|--------|----------|----------|----------|-------|
| C(52)  | 3947(2)  | 6419(2)  | 7772(1)  | 24(1) |
| C(53)  | 4547(2)  | 8160(2)  | 8763(1)  | 23(1) |
| C(54)  | 3157(2)  | 7718(2)  | 8771(1)  | 28(1) |
| C(55)  | 2588(2)  | 8608(2)  | 8774(1)  | 37(1) |
| C(56)  | 3397(3)  | 9939(2)  | 8761(1)  | 43(1) |
| C(57)  | 4781(2)  | 10381(2) | 8760(1)  | 38(1) |
| C(58)  | 5383(2)  | 9512(2)  | 8768(1)  | 27(1) |
| C(59)  | 6913(2)  | 10026(2) | 8813(1)  | 34(1) |
| C(60)  | 7710(2)  | 10222(2) | 9419(1)  | 38(1) |
| C(61)  | 6890(2)  | 9486(2)  | 9836(1)  | 30(1) |
| C(62)  | 6155(2)  | 7981(2)  | 9751(1)  | 28(1) |
| C(63)  | 8261(3)  | 6883(4)  | 9700(1)  | 29(1) |
| C(64)  | 7955(3)  | 5888(4)  | 10123(1) | 33(1) |
| C(65)  | 8052(3)  | 4605(3)  | 9999(1)  | 35(1) |
| C(66)  | 7151(2)  | 3885(2)  | 9447(1)  | 42(1) |
| C(63A) | 8649(10) | 7382(9)  | 9514(4)  | 21(2) |
| C(64A) | 8832(9)  | 6469(7)  | 9941(3)  | 26(2) |
| C(65A) | 7665(10) | 5170(10) | 9967(4)  | 24(2) |
| C(66A) | 7151(2)  | 3885(2)  | 9447(1)  | 42(1) |
| C(67)  | 7917(2)  | 4327(2)  | 8991(1)  | 26(1) |
| C(68)  | 8804(2)  | 3779(2)  | 8902(1)  | 34(1) |
| C(69)  | 9592(2)  | 4188(2)  | 8508(1)  | 35(1) |
| C(70)  | 9517(2)  | 5163(2)  | 8192(1)  | 32(1) |
| C(71)  | 8644(2)  | 5706(2)  | 8268(1)  | 26(1) |
| C(72)  | 7842(2)  | 5304(2)  | 8662(1)  | 22(1) |
| F(1)   | 7371(1)  | 9986(1)  | 5201(1)  | 24(1) |
| F(2)   | 7352(1)  | 11173(1) | 5870(1)  | 26(1) |
| F(3)   | 6372(1)  | 10362(1) | 6668(1)  | 26(1) |
| F(4)   | 7359(1)  | 10025(1) | 7431(1)  | 27(1) |
| F(5)   | 10500(1) | 6935(1)  | 7031(1)  | 24(1) |
| F(6)   | 10488(1) | 8141(1)  | 7693(1)  | 26(1) |
| F(7)   | 4124(1)  | 7701(1)  | 7708(1)  | 33(1) |
| F(8)   | 2687(1)  | 5785(1)  | 7919(1)  | 31(1) |
| F(9)   | 6589(1)  | 7452(1)  | 10202(1) | 45(1) |
| F(10)  | 4793(1)  | 7569(1)  | 9777(1)  | 33(1) |
| F(11)  | 8744(2)  | 8146(2)  | 9949(1)  | 34(1) |
| F(12)  | 9387(1)  | 6958(2)  | 9503(1)  | 31(1) |
| F(11A) | 9045(6)  | 8634(6)  | 9749(3)  | 26(1) |
| F(12A) | 9617(4)  | 7650(5)  | 9195(2)  | 28(2) |

---

**Table S8.** Bond lengths [Å] and angles [°] for minor trimer (**10**).

|              |            |              |            |
|--------------|------------|--------------|------------|
| C(1)-C(6)    | 1.407(2)   | C(27)-F(6)   | 1.3686(19) |
| C(1)-C(2)    | 1.410(2)   | C(27)-F(5)   | 1.3717(19) |
| C(1)-C(7)    | 1.502(2)   | C(27)-C(28)  | 1.517(2)   |
| C(2)-C(3)    | 1.413(2)   | C(28)-C(29)  | 1.530(3)   |
| C(2)-C(16)   | 1.539(2)   | C(28)-H(28A) | 0.9900     |
| C(3)-C(4)    | 1.413(2)   | C(28)-H(28B) | 0.9900     |
| C(3)-C(17)   | 1.541(2)   | C(29)-C(30)  | 1.538(3)   |
| C(4)-C(5)    | 1.412(2)   | C(29)-H(29A) | 0.9900     |
| C(4)-C(26)   | 1.516(2)   | C(29)-H(29B) | 0.9900     |
| C(5)-C(6)    | 1.406(2)   | C(30)-C(31)  | 1.513(3)   |
| C(5)-C(27)   | 1.536(2)   | C(30)-H(30A) | 0.9900     |
| C(6)-C(36)   | 1.502(2)   | C(30)-H(30B) | 0.9900     |
| C(7)-C(8)    | 1.396(2)   | C(31)-C(32)  | 1.394(3)   |
| C(7)-C(12)   | 1.400(2)   | C(31)-C(36)  | 1.395(2)   |
| C(8)-C(9)    | 1.384(2)   | C(32)-C(33)  | 1.380(3)   |
| C(8)-H(8)    | 0.9500     | C(32)-H(32)  | 0.9500     |
| C(9)-C(10)   | 1.391(3)   | C(33)-C(34)  | 1.385(3)   |
| C(9)-H(9)    | 0.9500     | C(33)-H(33)  | 0.9500     |
| C(10)-C(11)  | 1.378(3)   | C(34)-C(35)  | 1.386(3)   |
| C(10)-H(10)  | 0.9500     | C(34)-H(34)  | 0.9500     |
| C(11)-C(12)  | 1.397(2)   | C(35)-C(36)  | 1.393(2)   |
| C(11)-H(11)  | 0.9500     | C(35)-H(35)  | 0.9500     |
| C(12)-C(13)  | 1.510(2)   | C(37)-C(38)  | 1.408(2)   |
| C(13)-C(14)  | 1.542(2)   | C(37)-C(42)  | 1.415(2)   |
| C(13)-H(13A) | 0.9900     | C(37)-C(43)  | 1.506(2)   |
| C(13)-H(13B) | 0.9900     | C(38)-C(39)  | 1.416(2)   |
| C(14)-C(15)  | 1.529(2)   | C(38)-C(52)  | 1.541(2)   |
| C(14)-H(14A) | 0.9900     | C(39)-C(40)  | 1.405(2)   |
| C(14)-H(14B) | 0.9900     | C(39)-C(53)  | 1.508(2)   |
| C(15)-C(16)  | 1.524(2)   | C(40)-C(41)  | 1.412(2)   |
| C(15)-H(15A) | 0.9900     | C(40)-C(62)  | 1.537(2)   |
| C(15)-H(15B) | 0.9900     | C(41)-C(42)  | 1.407(3)   |
| C(16)-F(1)   | 1.375(2)   | C(41)-C(63)  | 1.563(3)   |
| C(16)-F(2)   | 1.3795(19) | C(41)-C(63A) | 1.575(9)   |
| C(17)-F(4)   | 1.374(2)   | C(42)-C(72)  | 1.504(2)   |
| C(17)-F(3)   | 1.3780(19) | C(43)-C(44)  | 1.394(2)   |
| C(17)-C(18)  | 1.534(2)   | C(43)-C(48)  | 1.399(3)   |
| C(18)-C(19)  | 1.537(3)   | C(44)-C(45)  | 1.388(2)   |
| C(18)-H(18A) | 0.9900     | C(44)-H(44)  | 0.9500     |
| C(18)-H(18B) | 0.9900     | C(45)-C(46)  | 1.382(3)   |
| C(19)-C(20)  | 1.557(2)   | C(45)-H(45)  | 0.9500     |
| C(19)-H(19A) | 0.9900     | C(46)-C(47)  | 1.383(3)   |
| C(19)-H(19B) | 0.9900     | C(46)-H(46)  | 0.9500     |
| C(20)-C(21)  | 1.502(3)   | C(47)-C(48)  | 1.394(3)   |
| C(20)-H(20A) | 0.9900     | C(47)-H(47)  | 0.9500     |
| C(20)-H(20B) | 0.9900     | C(48)-C(49)  | 1.502(3)   |
| C(21)-C(22)  | 1.398(2)   | C(49)-C(50)  | 1.539(3)   |
| C(21)-C(26)  | 1.398(2)   | C(49)-H(49A) | 0.9900     |
| C(22)-C(23)  | 1.377(3)   | C(49)-H(49B) | 0.9900     |
| C(22)-H(22)  | 0.9500     | C(50)-C(51)  | 1.526(3)   |
| C(23)-C(24)  | 1.389(3)   | C(50)-H(50A) | 0.9900     |
| C(23)-H(23)  | 0.9500     | C(50)-H(50B) | 0.9900     |
| C(24)-C(25)  | 1.380(3)   | C(51)-C(52)  | 1.510(2)   |
| C(24)-H(24)  | 0.9500     | C(51)-H(51A) | 0.9900     |
| C(25)-C(26)  | 1.396(2)   | C(51)-H(51B) | 0.9900     |
| C(25)-H(25)  | 0.9500     | C(52)-F(8)   | 1.380(2)   |



|                   |            |                     |            |
|-------------------|------------|---------------------|------------|
| C(52)-F(7)        | 1.385(2)   | C(64)-H(64A)        | 0.9900     |
| C(53)-C(54)       | 1.391(2)   | C(64)-H(64B)        | 0.9900     |
| C(53)-C(58)       | 1.401(3)   | C(65)-C(66)         | 1.527(3)   |
| C(54)-C(55)       | 1.388(3)   | C(65)-H(65A)        | 0.9900     |
| C(54)-H(54)       | 0.9500     | C(65)-H(65B)        | 0.9900     |
| C(55)-C(56)       | 1.382(3)   | C(66)-C(67)         | 1.500(3)   |
| C(55)-H(55)       | 0.9500     | C(66)-H(66A)        | 0.9900     |
| C(56)-C(57)       | 1.382(3)   | C(66)-H(66B)        | 0.9900     |
| C(56)-H(56)       | 0.9500     | C(63A)-F(12A)       | 1.375(12)  |
| C(57)-C(58)       | 1.391(3)   | C(63A)-F(11A)       | 1.376(10)  |
| C(57)-H(57)       | 0.9500     | C(63A)-C(64A)       | 1.529(12)  |
| C(58)-C(59)       | 1.504(3)   | C(64A)-C(65A)       | 1.489(12)  |
| C(59)-C(60)       | 1.562(3)   | C(64A)-H(64C)       | 0.9900     |
| C(59)-H(59A)      | 0.9900     | C(64A)-H(64D)       | 0.9900     |
| C(59)-H(59B)      | 0.9900     | C(65A)-H(65C)       | 0.9900     |
| C(60)-C(61)       | 1.516(3)   | C(65A)-H(65D)       | 0.9900     |
| C(60)-H(60A)      | 0.9900     | C(67)-C(72)         | 1.395(3)   |
| C(60)-H(60B)      | 0.9900     | C(67)-C(68)         | 1.401(3)   |
| C(61)-C(62)       | 1.527(3)   | C(68)-C(69)         | 1.381(3)   |
| C(61)-H(61A)      | 0.9900     | C(68)-H(68)         | 0.9500     |
| C(61)-H(61B)      | 0.9900     | C(69)-C(70)         | 1.374(3)   |
| C(62)-F(10)       | 1.376(2)   | C(69)-H(69)         | 0.9500     |
| C(62)-F(9)        | 1.377(2)   | C(70)-C(71)         | 1.374(3)   |
| C(63)-F(12)       | 1.380(3)   | C(70)-H(70)         | 0.9500     |
| C(63)-F(11)       | 1.385(4)   | C(71)-C(72)         | 1.389(3)   |
| C(63)-C(64)       | 1.516(5)   | C(71)-H(71)         | 0.9500     |
| C(64)-C(65)       | 1.526(4)   |                     |            |
|                   |            |                     |            |
| C(6)-C(1)-C(2)    | 120.01(15) | C(10)-C(11)-C(12)   | 121.84(17) |
| C(6)-C(1)-C(7)    | 116.55(14) | C(10)-C(11)-H(11)   | 119.1      |
| C(2)-C(1)-C(7)    | 123.43(14) | C(12)-C(11)-H(11)   | 119.1      |
| C(1)-C(2)-C(3)    | 119.21(15) | C(11)-C(12)-C(7)    | 118.45(17) |
| C(1)-C(2)-C(16)   | 118.83(14) | C(11)-C(12)-C(13)   | 118.52(16) |
| C(3)-C(2)-C(16)   | 121.93(14) | C(7)-C(12)-C(13)    | 122.86(15) |
| C(2)-C(3)-C(4)    | 120.44(15) | C(12)-C(13)-C(14)   | 111.54(14) |
| C(2)-C(3)-C(17)   | 124.27(14) | C(12)-C(13)-H(13A)  | 109.3      |
| C(4)-C(3)-C(17)   | 115.27(14) | C(14)-C(13)-H(13A)  | 109.3      |
| C(5)-C(4)-C(3)    | 119.28(15) | C(12)-C(13)-H(13B)  | 109.3      |
| C(5)-C(4)-C(26)   | 122.12(14) | C(14)-C(13)-H(13B)  | 109.3      |
| C(3)-C(4)-C(26)   | 117.99(14) | H(13A)-C(13)-H(13B) | 108.0      |
| C(6)-C(5)-C(4)    | 119.84(15) | C(15)-C(14)-C(13)   | 115.61(14) |
| C(6)-C(5)-C(27)   | 119.99(14) | C(15)-C(14)-H(14A)  | 108.4      |
| C(4)-C(5)-C(27)   | 120.02(14) | C(13)-C(14)-H(14A)  | 108.4      |
| C(5)-C(6)-C(1)    | 120.47(15) | C(15)-C(14)-H(14B)  | 108.4      |
| C(5)-C(6)-C(36)   | 120.82(14) | C(13)-C(14)-H(14B)  | 108.4      |
| C(1)-C(6)-C(36)   | 118.70(14) | H(14A)-C(14)-H(14B) | 107.4      |
| C(8)-C(7)-C(12)   | 119.38(15) | C(16)-C(15)-C(14)   | 116.15(14) |
| C(8)-C(7)-C(1)    | 118.37(15) | C(16)-C(15)-H(15A)  | 108.2      |
| C(12)-C(7)-C(1)   | 122.24(15) | C(14)-C(15)-H(15A)  | 108.2      |
| C(9)-C(8)-C(7)    | 121.36(16) | C(16)-C(15)-H(15B)  | 108.2      |
| C(9)-C(8)-H(8)    | 119.3      | C(14)-C(15)-H(15B)  | 108.2      |
| C(7)-C(8)-H(8)    | 119.3      | H(15A)-C(15)-H(15B) | 107.4      |
| C(8)-C(9)-C(10)   | 119.33(17) | F(1)-C(16)-F(2)     | 102.03(13) |
| C(8)-C(9)-H(9)    | 120.3      | F(1)-C(16)-C(15)    | 109.05(13) |
| C(10)-C(9)-H(9)   | 120.3      | F(2)-C(16)-C(15)    | 109.80(13) |
| C(11)-C(10)-C(9)  | 119.63(17) | F(1)-C(16)-C(2)     | 109.96(13) |
| C(11)-C(10)-H(10) | 120.2      | F(2)-C(16)-C(2)     | 108.68(13) |
| C(9)-C(10)-H(10)  | 120.2      | C(15)-C(16)-C(2)    | 116.36(14) |

|                     |            |                     |            |
|---------------------|------------|---------------------|------------|
| F(4)-C(17)-F(3)     | 101.32(13) | C(30)-C(29)-H(29B)  | 108.0      |
| F(4)-C(17)-C(18)    | 109.14(14) | H(29A)-C(29)-H(29B) | 107.3      |
| F(3)-C(17)-C(18)    | 109.48(14) | C(31)-C(30)-C(29)   | 112.36(15) |
| F(4)-C(17)-C(3)     | 107.22(13) | C(31)-C(30)-H(30A)  | 109.1      |
| F(3)-C(17)-C(3)     | 110.10(13) | C(29)-C(30)-H(30A)  | 109.1      |
| C(18)-C(17)-C(3)    | 118.21(14) | C(31)-C(30)-H(30B)  | 109.1      |
| C(17)-C(18)-C(19)   | 119.17(15) | C(29)-C(30)-H(30B)  | 109.1      |
| C(17)-C(18)-H(18A)  | 107.5      | H(30A)-C(30)-H(30B) | 107.9      |
| C(19)-C(18)-H(18A)  | 107.5      | C(32)-C(31)-C(36)   | 118.18(17) |
| C(17)-C(18)-H(18B)  | 107.5      | C(32)-C(31)-C(30)   | 119.51(17) |
| C(19)-C(18)-H(18B)  | 107.5      | C(36)-C(31)-C(30)   | 122.19(15) |
| H(18A)-C(18)-H(18B) | 107.0      | C(33)-C(32)-C(31)   | 121.73(19) |
| C(18)-C(19)-C(20)   | 116.37(15) | C(33)-C(32)-H(32)   | 119.1      |
| C(18)-C(19)-H(19A)  | 108.2      | C(31)-C(32)-H(32)   | 119.1      |
| C(20)-C(19)-H(19A)  | 108.2      | C(32)-C(33)-C(34)   | 119.75(17) |
| C(18)-C(19)-H(19B)  | 108.2      | C(32)-C(33)-H(33)   | 120.1      |
| C(20)-C(19)-H(19B)  | 108.2      | C(34)-C(33)-H(33)   | 120.1      |
| H(19A)-C(19)-H(19B) | 107.3      | C(33)-C(34)-C(35)   | 119.50(18) |
| C(21)-C(20)-C(19)   | 111.55(15) | C(33)-C(34)-H(34)   | 120.2      |
| C(21)-C(20)-H(20A)  | 109.3      | C(35)-C(34)-H(34)   | 120.2      |
| C(19)-C(20)-H(20A)  | 109.3      | C(34)-C(35)-C(36)   | 120.67(18) |
| C(21)-C(20)-H(20B)  | 109.3      | C(34)-C(35)-H(35)   | 119.7      |
| C(19)-C(20)-H(20B)  | 109.3      | C(36)-C(35)-H(35)   | 119.7      |
| H(20A)-C(20)-H(20B) | 108.0      | C(35)-C(36)-C(31)   | 120.12(16) |
| C(22)-C(21)-C(26)   | 119.17(17) | C(35)-C(36)-C(6)    | 118.86(15) |
| C(22)-C(21)-C(20)   | 120.01(16) | C(31)-C(36)-C(6)    | 120.95(15) |
| C(26)-C(21)-C(20)   | 120.56(15) | C(38)-C(37)-C(42)   | 119.88(15) |
| C(23)-C(22)-C(21)   | 121.03(18) | C(38)-C(37)-C(43)   | 124.82(15) |
| C(23)-C(22)-H(22)   | 119.5      | C(42)-C(37)-C(43)   | 115.30(15) |
| C(21)-C(22)-H(22)   | 119.5      | C(37)-C(38)-C(39)   | 119.31(15) |
| C(22)-C(23)-C(24)   | 119.64(17) | C(37)-C(38)-C(52)   | 122.97(15) |
| C(22)-C(23)-H(23)   | 120.2      | C(39)-C(38)-C(52)   | 117.70(15) |
| C(24)-C(23)-H(23)   | 120.2      | C(40)-C(39)-C(38)   | 120.00(15) |
| C(25)-C(24)-C(23)   | 120.10(18) | C(40)-C(39)-C(53)   | 117.64(15) |
| C(25)-C(24)-H(24)   | 119.9      | C(38)-C(39)-C(53)   | 121.97(15) |
| C(23)-C(24)-H(24)   | 119.9      | C(39)-C(40)-C(41)   | 120.19(16) |
| C(24)-C(25)-C(26)   | 120.70(18) | C(39)-C(40)-C(62)   | 116.36(15) |
| C(24)-C(25)-H(25)   | 119.6      | C(41)-C(40)-C(62)   | 123.44(16) |
| C(26)-C(25)-H(25)   | 119.6      | C(42)-C(41)-C(40)   | 119.12(16) |
| C(25)-C(26)-C(21)   | 119.26(16) | C(42)-C(41)-C(63)   | 119.70(17) |
| C(25)-C(26)-C(4)    | 124.15(15) | C(40)-C(41)-C(63)   | 121.02(18) |
| C(21)-C(26)-C(4)    | 116.57(15) | C(42)-C(41)-C(63A)  | 112.2(4)   |
| F(6)-C(27)-F(5)     | 102.60(12) | C(40)-C(41)-C(63A)  | 122.9(3)   |
| F(6)-C(27)-C(28)    | 108.22(14) | C(63)-C(41)-C(63A)  | 28.2(3)    |
| F(5)-C(27)-C(28)    | 110.18(14) | C(41)-C(42)-C(37)   | 120.26(16) |
| F(6)-C(27)-C(5)     | 109.22(13) | C(41)-C(42)-C(72)   | 122.07(16) |
| F(5)-C(27)-C(5)     | 111.48(13) | C(37)-C(42)-C(72)   | 117.66(15) |
| C(28)-C(27)-C(5)    | 114.42(14) | C(44)-C(43)-C(48)   | 119.35(16) |
| C(27)-C(28)-C(29)   | 116.55(15) | C(44)-C(43)-C(37)   | 117.95(15) |
| C(27)-C(28)-H(28A)  | 108.2      | C(48)-C(43)-C(37)   | 122.41(15) |
| C(29)-C(28)-H(28A)  | 108.2      | C(45)-C(44)-C(43)   | 121.10(17) |
| C(27)-C(28)-H(28B)  | 108.2      | C(45)-C(44)-H(44)   | 119.4      |
| C(29)-C(28)-H(28B)  | 108.2      | C(43)-C(44)-H(44)   | 119.4      |
| H(28A)-C(28)-H(28B) | 107.3      | C(46)-C(45)-C(44)   | 119.57(17) |
| C(28)-C(29)-C(30)   | 117.10(15) | C(46)-C(45)-H(45)   | 120.2      |
| C(28)-C(29)-H(29A)  | 108.0      | C(44)-C(45)-H(45)   | 120.2      |
| C(30)-C(29)-H(29A)  | 108.0      | C(45)-C(46)-C(47)   | 119.70(17) |
| C(28)-C(29)-H(29B)  | 108.0      | C(45)-C(46)-H(46)   | 120.1      |

|                     |            |                      |            |
|---------------------|------------|----------------------|------------|
| C(47)-C(46)-H(46)   | 120.1      | C(61)-C(60)-H(60B)   | 108.0      |
| C(46)-C(47)-C(48)   | 121.53(18) | C(59)-C(60)-H(60B)   | 108.0      |
| C(46)-C(47)-H(47)   | 119.2      | H(60A)-C(60)-H(60B)  | 107.2      |
| C(48)-C(47)-H(47)   | 119.2      | C(60)-C(61)-C(62)    | 118.41(16) |
| C(47)-C(48)-C(43)   | 118.72(17) | C(60)-C(61)-H(61A)   | 107.7      |
| C(47)-C(48)-C(49)   | 120.85(17) | C(62)-C(61)-H(61A)   | 107.7      |
| C(43)-C(48)-C(49)   | 120.12(16) | C(60)-C(61)-H(61B)   | 107.7      |
| C(48)-C(49)-C(50)   | 109.43(14) | C(62)-C(61)-H(61B)   | 107.7      |
| C(48)-C(49)-H(49A)  | 109.8      | H(61A)-C(61)-H(61B)  | 107.1      |
| C(50)-C(49)-H(49A)  | 109.8      | F(10)-C(62)-F(9)     | 100.24(15) |
| C(48)-C(49)-H(49B)  | 109.8      | F(10)-C(62)-C(61)    | 109.20(14) |
| C(50)-C(49)-H(49B)  | 109.8      | F(9)-C(62)-C(61)     | 109.96(15) |
| H(49A)-C(49)-H(49B) | 108.2      | F(10)-C(62)-C(40)    | 107.09(14) |
| C(51)-C(50)-C(49)   | 113.42(15) | F(9)-C(62)-C(40)     | 110.19(15) |
| C(51)-C(50)-H(50A)  | 108.9      | C(61)-C(62)-C(40)    | 118.55(16) |
| C(49)-C(50)-H(50A)  | 108.9      | F(12)-C(63)-F(11)    | 101.8(3)   |
| C(51)-C(50)-H(50B)  | 108.9      | F(12)-C(63)-C(64)    | 109.6(2)   |
| C(49)-C(50)-H(50B)  | 108.9      | F(11)-C(63)-C(64)    | 110.1(3)   |
| H(50A)-C(50)-H(50B) | 107.7      | F(12)-C(63)-C(41)    | 107.8(2)   |
| C(52)-C(51)-C(50)   | 116.51(15) | F(11)-C(63)-C(41)    | 106.6(2)   |
| C(52)-C(51)-H(51A)  | 108.2      | C(64)-C(63)-C(41)    | 119.5(3)   |
| C(50)-C(51)-H(51A)  | 108.2      | C(63)-C(64)-C(65)    | 117.2(2)   |
| C(52)-C(51)-H(51B)  | 108.2      | C(63)-C(64)-H(64A)   | 108.0      |
| C(50)-C(51)-H(51B)  | 108.2      | C(65)-C(64)-H(64A)   | 108.0      |
| H(51A)-C(51)-H(51B) | 107.3      | C(63)-C(64)-H(64B)   | 108.0      |
| F(8)-C(52)-F(7)     | 105.36(13) | C(65)-C(64)-H(64B)   | 108.0      |
| F(8)-C(52)-C(51)    | 106.19(14) | H(64A)-C(64)-H(64B)  | 107.2      |
| F(7)-C(52)-C(51)    | 104.62(14) | C(64)-C(65)-C(66)    | 112.2(2)   |
| F(8)-C(52)-C(38)    | 106.49(14) | C(64)-C(65)-H(65A)   | 109.2      |
| F(7)-C(52)-C(38)    | 107.57(13) | C(66)-C(65)-H(65A)   | 109.2      |
| C(51)-C(52)-C(38)   | 125.14(15) | C(64)-C(65)-H(65B)   | 109.2      |
| C(54)-C(53)-C(58)   | 119.99(17) | C(66)-C(65)-H(65B)   | 109.2      |
| C(54)-C(53)-C(39)   | 122.94(16) | H(65A)-C(65)-H(65B)  | 107.9      |
| C(58)-C(53)-C(39)   | 117.07(15) | C(67)-C(66)-C(65)    | 111.41(19) |
| C(55)-C(54)-C(53)   | 120.29(19) | C(67)-C(66)-H(66A)   | 109.3      |
| C(55)-C(54)-H(54)   | 119.9      | C(65)-C(66)-H(66A)   | 109.3      |
| C(53)-C(54)-H(54)   | 119.9      | C(67)-C(66)-H(66B)   | 109.3      |
| C(56)-C(55)-C(54)   | 120.02(19) | C(65)-C(66)-H(66B)   | 109.3      |
| C(56)-C(55)-H(55)   | 120.0      | H(66A)-C(66)-H(66B)  | 108.0      |
| C(54)-C(55)-H(55)   | 120.0      | F(12A)-C(63A)-F(11A) | 99.7(7)    |
| C(55)-C(56)-C(57)   | 119.71(18) | F(12A)-C(63A)-C(64A) | 109.2(7)   |
| C(55)-C(56)-H(56)   | 120.1      | F(11A)-C(63A)-C(64A) | 111.6(7)   |
| C(57)-C(56)-H(56)   | 120.1      | F(12A)-C(63A)-C(41)  | 115.7(7)   |
| C(56)-C(57)-C(58)   | 121.4(2)   | F(11A)-C(63A)-C(41)  | 112.6(6)   |
| C(56)-C(57)-H(57)   | 119.3      | C(64A)-C(63A)-C(41)  | 108.0(7)   |
| C(58)-C(57)-H(57)   | 119.3      | C(65A)-C(64A)-C(63A) | 119.9(7)   |
| C(57)-C(58)-C(53)   | 118.52(18) | C(65A)-C(64A)-H(64C) | 107.3      |
| C(57)-C(58)-C(59)   | 120.38(19) | C(63A)-C(64A)-H(64C) | 107.3      |
| C(53)-C(58)-C(59)   | 121.01(17) | C(65A)-C(64A)-H(64D) | 107.3      |
| C(58)-C(59)-C(60)   | 112.45(16) | C(63A)-C(64A)-H(64D) | 107.3      |
| C(58)-C(59)-H(59A)  | 109.1      | H(64C)-C(64A)-H(64D) | 106.9      |
| C(60)-C(59)-H(59A)  | 109.1      | C(64A)-C(65A)-H(65C) | 107.4      |
| C(58)-C(59)-H(59B)  | 109.1      | C(64A)-C(65A)-H(65D) | 107.4      |
| C(60)-C(59)-H(59B)  | 109.1      | H(65C)-C(65A)-H(65D) | 106.9      |
| H(59A)-C(59)-H(59B) | 107.8      | C(72)-C(67)-C(68)    | 117.60(17) |
| C(61)-C(60)-C(59)   | 117.24(17) | C(72)-C(67)-C(66)    | 123.43(18) |
| C(61)-C(60)-H(60A)  | 108.0      | C(68)-C(67)-C(66)    | 118.90(18) |
| C(59)-C(60)-H(60A)  | 108.0      | C(69)-C(68)-C(67)    | 121.92(18) |

|                   |            |
|-------------------|------------|
| C(69)-C(68)-H(68) | 119.0      |
| C(67)-C(68)-H(68) | 119.0      |
| C(70)-C(69)-C(68) | 119.63(18) |
| C(70)-C(69)-H(69) | 120.2      |
| C(68)-C(69)-H(69) | 120.2      |
| C(71)-C(70)-C(69) | 119.49(19) |
| C(71)-C(70)-H(70) | 120.3      |
| C(69)-C(70)-H(70) | 120.3      |
| C(70)-C(71)-C(72) | 121.62(18) |
| C(70)-C(71)-H(71) | 119.2      |
| C(72)-C(71)-H(71) | 119.2      |
| C(71)-C(72)-C(67) | 119.73(16) |
| C(71)-C(72)-C(42) | 118.53(16) |
| C(67)-C(72)-C(42) | 121.73(16) |

Symmetry transformations used to generate equivalent atoms:

**Table S9.** Anisotropic displacement parameters ( $\text{\AA}^2 \times 10^3$ ) for minor trimer (10). The anisotropic displacement factor exponent takes the form:  $-2p^2[h^2a^*2U^{11} + \dots + 2hk a^*b^*U^{12}]$

|       | $U^{11}$ | $U^{22}$ | $U^{33}$ | $U^{23}$ | $U^{13}$ | $U^{12}$ |
|-------|----------|----------|----------|----------|----------|----------|
| C(1)  | 16(1)    | 15(1)    | 19(1)    | 3(1)     | 4(1)     | 2(1)     |
| C(2)  | 16(1)    | 17(1)    | 21(1)    | 3(1)     | 3(1)     | 4(1)     |
| C(3)  | 16(1)    | 15(1)    | 22(1)    | 2(1)     | 5(1)     | 4(1)     |
| C(4)  | 16(1)    | 16(1)    | 19(1)    | 4(1)     | 6(1)     | 4(1)     |
| C(5)  | 15(1)    | 17(1)    | 19(1)    | 5(1)     | 5(1)     | 4(1)     |
| C(6)  | 16(1)    | 15(1)    | 19(1)    | 3(1)     | 5(1)     | 4(1)     |
| C(7)  | 25(1)    | 15(1)    | 18(1)    | 4(1)     | 3(1)     | 9(1)     |
| C(8)  | 25(1)    | 19(1)    | 22(1)    | 5(1)     | 4(1)     | 10(1)    |
| C(9)  | 34(1)    | 26(1)    | 22(1)    | 6(1)     | 11(1)    | 13(1)    |
| C(10) | 43(1)    | 30(1)    | 18(1)    | 0(1)     | 5(1)     | 14(1)    |
| C(11) | 31(1)    | 23(1)    | 21(1)    | 1(1)     | -1(1)    | 7(1)     |
| C(12) | 26(1)    | 15(1)    | 20(1)    | 4(1)     | 2(1)     | 7(1)     |
| C(13) | 22(1)    | 21(1)    | 22(1)    | 3(1)     | 1(1)     | 4(1)     |
| C(14) | 20(1)    | 28(1)    | 24(1)    | 2(1)     | 1(1)     | 7(1)     |
| C(15) | 22(1)    | 28(1)    | 23(1)    | 4(1)     | 1(1)     | 13(1)    |
| C(16) | 24(1)    | 20(1)    | 20(1)    | 2(1)     | 3(1)     | 10(1)    |
| C(17) | 20(1)    | 28(1)    | 22(1)    | 1(1)     | 3(1)     | 12(1)    |
| C(18) | 27(1)    | 26(1)    | 31(1)    | -5(1)    | 0(1)     | 14(1)    |
| C(19) | 30(1)    | 19(1)    | 33(1)    | 2(1)     | 2(1)     | 8(1)     |
| C(20) | 22(1)    | 18(1)    | 27(1)    | 0(1)     | 6(1)     | 3(1)     |
| C(21) | 18(1)    | 23(1)    | 26(1)    | -2(1)    | 3(1)     | 11(1)    |
| C(22) | 22(1)    | 28(1)    | 31(1)    | -8(1)    | -1(1)    | 13(1)    |
| C(23) | 31(1)    | 43(1)    | 23(1)    | -11(1)   | -5(1)    | 24(1)    |
| C(24) | 34(1)    | 48(1)    | 19(1)    | 3(1)     | 6(1)     | 28(1)    |
| C(25) | 23(1)    | 31(1)    | 24(1)    | 5(1)     | 7(1)     | 14(1)    |
| C(26) | 18(1)    | 24(1)    | 19(1)    | 0(1)     | 3(1)     | 11(1)    |
| C(27) | 26(1)    | 21(1)    | 17(1)    | 2(1)     | 4(1)     | 12(1)    |
| C(28) | 20(1)    | 27(1)    | 29(1)    | 0(1)     | 0(1)     | 11(1)    |
| C(29) | 20(1)    | 33(1)    | 33(1)    | 4(1)     | 6(1)     | 11(1)    |
| C(30) | 23(1)    | 35(1)    | 29(1)    | 10(1)    | 12(1)    | 14(1)    |
| C(31) | 29(1)    | 32(1)    | 17(1)    | 7(1)     | 8(1)     | 17(1)    |
| C(32) | 42(1)    | 46(1)    | 24(1)    | 7(1)     | 11(1)    | 31(1)    |
| C(33) | 62(1)    | 41(1)    | 25(1)    | 2(1)     | 8(1)     | 38(1)    |
| C(34) | 54(1)    | 23(1)    | 23(1)    | 0(1)     | 0(1)     | 18(1)    |
| C(35) | 32(1)    | 22(1)    | 19(1)    | 2(1)     | 3(1)     | 11(1)    |
| C(36) | 26(1)    | 22(1)    | 14(1)    | 4(1)     | 4(1)     | 12(1)    |
| C(37) | 18(1)    | 18(1)    | 24(1)    | 0(1)     | 5(1)     | 5(1)     |
| C(38) | 18(1)    | 22(1)    | 22(1)    | 1(1)     | 3(1)     | 6(1)     |
| C(39) | 18(1)    | 23(1)    | 23(1)    | 1(1)     | 4(1)     | 7(1)     |
| C(40) | 24(1)    | 28(1)    | 26(1)    | -4(1)    | -1(1)    | 13(1)    |
| C(41) | 25(1)    | 36(1)    | 34(1)    | -12(1)   | -6(1)    | 17(1)    |
| C(42) | 20(1)    | 22(1)    | 30(1)    | -3(1)    | 2(1)     | 8(1)     |
| C(43) | 15(1)    | 20(1)    | 23(1)    | -1(1)    | 1(1)     | 6(1)     |
| C(44) | 20(1)    | 21(1)    | 24(1)    | 2(1)     | 0(1)     | 7(1)     |
| C(45) | 24(1)    | 20(1)    | 34(1)    | -3(1)    | -2(1)    | 9(1)     |
| C(46) | 29(1)    | 33(1)    | 31(1)    | -10(1)   | -1(1)    | 15(1)    |
| C(47) | 24(1)    | 38(1)    | 22(1)    | -2(1)    | 4(1)     | 11(1)    |
| C(48) | 16(1)    | 25(1)    | 24(1)    | 1(1)     | 2(1)     | 5(1)     |
| C(49) | 25(1)    | 25(1)    | 27(1)    | 4(1)     | 8(1)     | 5(1)     |
| C(50) | 31(1)    | 28(1)    | 25(1)    | 8(1)     | 7(1)     | 9(1)     |
| C(51) | 26(1)    | 25(1)    | 25(1)    | 3(1)     | 2(1)     | 10(1)    |
| C(52) | 22(1)    | 24(1)    | 26(1)    | 2(1)     | 5(1)     | 9(1)     |

|        |       |       |       |        |        |       |
|--------|-------|-------|-------|--------|--------|-------|
| C(53)  | 25(1) | 29(1) | 16(1) | 0(1)   | 2(1)   | 14(1) |
| C(54)  | 24(1) | 42(1) | 18(1) | 0(1)   | 2(1)   | 16(1) |
| C(55)  | 36(1) | 67(2) | 22(1) | -4(1)  | 0(1)   | 36(1) |
| C(56)  | 62(2) | 57(1) | 29(1) | -5(1)  | -4(1)  | 48(1) |
| C(57)  | 58(1) | 33(1) | 25(1) | -1(1)  | -2(1)  | 26(1) |
| C(58)  | 36(1) | 29(1) | 18(1) | 0(1)   | 3(1)   | 15(1) |
| C(59)  | 35(1) | 29(1) | 28(1) | -1(1)  | 10(1)  | 4(1)  |
| C(60)  | 28(1) | 40(1) | 33(1) | -6(1)  | 4(1)   | 5(1)  |
| C(61)  | 33(1) | 34(1) | 23(1) | -6(1)  | 1(1)   | 17(1) |
| C(62)  | 31(1) | 36(1) | 21(1) | -1(1)  | -1(1)  | 20(1) |
| C(63)  | 23(2) | 34(2) | 32(2) | -11(1) | -3(1)  | 17(2) |
| C(64)  | 38(2) | 47(2) | 20(1) | -2(1)  | -4(1)  | 28(2) |
| C(65)  | 43(2) | 43(2) | 26(1) | 2(1)   | -1(1)  | 28(2) |
| C(66)  | 36(1) | 52(1) | 24(1) | 4(1)   | 2(1)   | 7(1)  |
| C(63A) | 20(5) | 14(4) | 27(5) | -2(4)  | -1(4)  | 6(4)  |
| C(64A) | 36(5) | 18(4) | 25(4) | 3(3)   | 1(4)   | 14(4) |
| C(65A) | 40(5) | 16(4) | 18(4) | 3(4)   | 8(4)   | 14(4) |
| C(66A) | 36(1) | 52(1) | 24(1) | 4(1)   | 2(1)   | 7(1)  |
| C(67)  | 21(1) | 27(1) | 24(1) | 1(1)   | -2(1)  | 6(1)  |
| C(68)  | 31(1) | 23(1) | 40(1) | 2(1)   | -8(1)  | 12(1) |
| C(69)  | 27(1) | 34(1) | 45(1) | -10(1) | -1(1)  | 19(1) |
| C(70)  | 23(1) | 40(1) | 32(1) | -4(1)  | 5(1)   | 13(1) |
| C(71)  | 19(1) | 24(1) | 29(1) | 2(1)   | 2(1)   | 6(1)  |
| C(72)  | 18(1) | 19(1) | 24(1) | -4(1)  | -1(1)  | 6(1)  |
| F(1)   | 27(1) | 24(1) | 21(1) | 7(1)   | 5(1)   | 11(1) |
| F(2)   | 28(1) | 19(1) | 30(1) | 2(1)   | 2(1)   | 12(1) |
| F(3)   | 20(1) | 32(1) | 28(1) | -2(1)  | 1(1)   | 14(1) |
| F(4)   | 28(1) | 36(1) | 23(1) | 3(1)   | 9(1)   | 16(1) |
| F(5)   | 32(1) | 21(1) | 22(1) | 3(1)   | 4(1)   | 14(1) |
| F(6)   | 34(1) | 29(1) | 16(1) | 4(1)   | 4(1)   | 16(1) |
| F(7)   | 45(1) | 29(1) | 27(1) | 3(1)   | 2(1)   | 21(1) |
| F(8)   | 18(1) | 42(1) | 29(1) | 4(1)   | 3(1)   | 10(1) |
| F(9)   | 64(1) | 46(1) | 26(1) | -3(1)  | -13(1) | 35(1) |
| F(10)  | 32(1) | 44(1) | 22(1) | 4(1)   | 8(1)   | 14(1) |
| F(11)  | 27(1) | 38(1) | 34(1) | -17(1) | -8(1)  | 17(1) |
| F(12)  | 21(1) | 37(1) | 34(1) | -11(1) | -4(1)  | 15(1) |
| F(11A) | 30(3) | 15(3) | 29(3) | -2(2)  | -6(2)  | 10(2) |
| F(12A) | 15(2) | 30(3) | 33(3) | -1(2)  | 6(2)   | 5(2)  |

---

**Table S10.** Hydrogen coordinates ( $\times 10^4$ ) and isotropic displacement parameters ( $\text{\AA}^2 \times 10^3$ ) for minor trimer (**10**).

|        | x     | y     | z     | U(eq) |
|--------|-------|-------|-------|-------|
| H(8)   | 9919  | 8867  | 5202  | 26    |
| H(9)   | 9491  | 8132  | 4282  | 32    |
| H(10)  | 7229  | 6745  | 3828  | 37    |
| H(11)  | 5439  | 6165  | 4291  | 33    |
| H(13A) | 5622  | 6837  | 5684  | 29    |
| H(13B) | 4621  | 5976  | 5132  | 29    |
| H(14A) | 4897  | 8201  | 4816  | 31    |
| H(14B) | 3767  | 7450  | 5169  | 31    |
| H(15A) | 4994  | 9700  | 5485  | 29    |
| H(15B) | 5171  | 8797  | 5957  | 29    |
| H(18A) | 8821  | 12252 | 7486  | 33    |
| H(18B) | 7987  | 12520 | 6944  | 33    |
| H(19A) | 10338 | 13662 | 6979  | 35    |
| H(19B) | 9644  | 12603 | 6457  | 35    |
| H(20A) | 10878 | 11499 | 6751  | 29    |
| H(20B) | 11920 | 12887 | 7087  | 29    |
| H(22)  | 12180 | 13172 | 8072  | 33    |
| H(23)  | 11766 | 12286 | 8895  | 37    |
| H(24)  | 10101 | 10118 | 8890  | 36    |
| H(25)  | 8940  | 8822  | 8066  | 30    |
| H(28A) | 12749 | 9136  | 7533  | 31    |
| H(28B) | 12227 | 10062 | 7173  | 31    |
| H(29A) | 12985 | 8148  | 6780  | 34    |
| H(29B) | 13736 | 9702  | 6748  | 34    |
| H(30A) | 11592 | 9405  | 6093  | 33    |
| H(30B) | 12645 | 8981  | 5873  | 33    |
| H(32)  | 12115 | 6619  | 5755  | 39    |
| H(33)  | 10475 | 4443  | 5565  | 44    |
| H(34)  | 8201  | 3880  | 5640  | 41    |
| H(35)  | 7606  | 5515  | 5915  | 30    |
| H(44)  | 4880  | 3181  | 8273  | 27    |
| H(45)  | 4704  | 1564  | 7635  | 33    |
| H(46)  | 5359  | 2156  | 6800  | 38    |
| H(47)  | 6109  | 4338  | 6597  | 35    |
| H(49A) | 6880  | 6672  | 6882  | 33    |
| H(49B) | 6767  | 7101  | 7478  | 33    |
| H(50A) | 5111  | 7491  | 6901  | 35    |
| H(50B) | 4626  | 6169  | 6512  | 35    |
| H(51A) | 2903  | 5804  | 6977  | 32    |
| H(51B) | 3642  | 4913  | 7222  | 32    |
| H(54)  | 2596  | 6802  | 8775  | 33    |
| H(55)  | 1642  | 8303  | 8786  | 45    |
| H(56)  | 3003  | 10547 | 8752  | 52    |
| H(57)  | 5334  | 11298 | 8755  | 45    |
| H(59A) | 7259  | 10881 | 8651  | 40    |
| H(59B) | 7098  | 9399  | 8600  | 40    |
| H(60A) | 8466  | 9957  | 9424  | 45    |
| H(60B) | 8141  | 11176 | 9541  | 45    |
| H(61A) | 6187  | 9811  | 9852  | 36    |
| H(61B) | 7523  | 9734  | 10199 | 36    |
| H(64A) | 7012  | 5660  | 10178 | 39    |
| H(64B) | 8599  | 6325  | 10474 | 39    |

|        |       |      |       |    |
|--------|-------|------|-------|----|
| H(65A) | 7766  | 4020 | 10292 | 42 |
| H(65B) | 9023  | 4803 | 9998  | 42 |
| H(66A) | 6841  | 2923 | 9463  | 51 |
| H(66B) | 6323  | 4056 | 9372  | 51 |
| H(64C) | 9615  | 6296 | 9886  | 31 |
| H(64D) | 9114  | 6967 | 10306 | 31 |
| H(65C) | 6852  | 5333 | 9981  | 28 |
| H(65D) | 7901  | 4838 | 10320 | 28 |
| H(66C) | 7312  | 3147 | 9607  | 51 |
| H(66D) | 6151  | 3554 | 9296  | 51 |
| H(68)  | 8865  | 3106 | 9119  | 40 |
| H(69)  | 10183 | 3798 | 8455  | 41 |
| H(70)  | 10064 | 5459 | 7923  | 39 |
| H(71)  | 8588  | 6372 | 8046  | 31 |



## Dimer 13

A colorless prism 0.12 x 0.10 x 0.06 mm in size was mounted on a Cryoloop with Paratone oil. Data were collected in a nitrogen gas stream at 100(2) K using phi and omega scans. Crystal-to-detector distance was 60 mm and exposure time was 5 seconds per frame using a scan width of 1.0°. Data collection was 97.9% complete to 67.00° in  $\theta$ . A total of 38046 reflections were collected covering the indices,  $-13 \leq h \leq 13$ ,  $-13 \leq k \leq 17$ ,  $-18 \leq l \leq 18$ . 7750 reflections were found to be symmetry independent, with an  $R_{\text{int}}$  of 0.0245. Indexing and unit cell refinement indicated a primitive, triclinic lattice. The space group was found to be P-1 (No. 2). The data were integrated using the Bruker SAINT software program and scaled using the SADABS software program. Solution by direct methods (SIR-2008) produced a complete heavy-atom phasing model consistent with the proposed structure. All non-hydrogen atoms were refined anisotropically by full-matrix least-squares (SHELXL-97). All hydrogen atoms, except for the water hydrogen atoms H8x and H8y, were placed using a riding model. Their positions were constrained relative to their parent atom using the appropriate HFIX command in SHELXL-97. The hydrogen atoms H8x and H8y were located from the Fourier difference map and their distances were restrained to the parent oxygen atom O8.

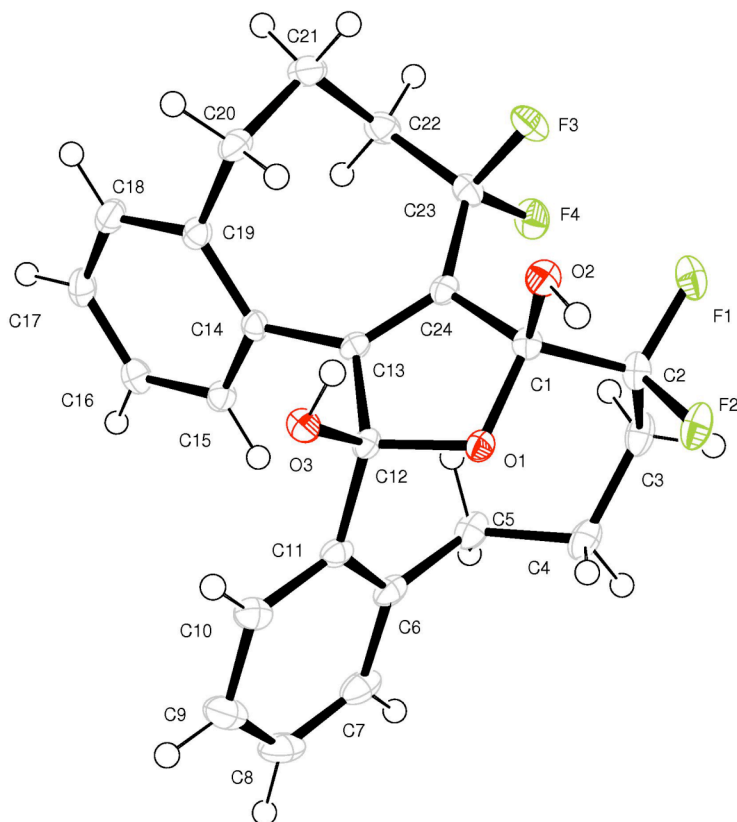

**Figure S14.** X-ray structure of dimer **13** with carbon, fluorine, and oxygen atoms labeled. ORTEPs are shown at 50% probability.

**Table S11.** Crystal data and structure refinement for dimer **13**.

---

|                                   |                                             |                            |
|-----------------------------------|---------------------------------------------|----------------------------|
| Empirical formula                 | C51 H52 F8 O8                               |                            |
| Formula weight                    | 944.93                                      |                            |
| Temperature                       | 100(2) K                                    |                            |
| Wavelength                        | 1.54178 Å                                   |                            |
| Crystal system                    | Triclinic                                   |                            |
| Space group                       | P-1                                         |                            |
| Unit cell dimensions              | a = 10.9513(5) Å                            | $\alpha = 63.010(2)^\circ$ |
|                                   | b = 14.9709(7) Å                            | $\beta = 75.207(2)^\circ$  |
|                                   | c = 15.4572(7) Å                            | $\gamma = 80.666(2)^\circ$ |
| Volume                            | 2180.20(17) Å <sup>3</sup>                  |                            |
| Z                                 | 2                                           |                            |
| Density (calculated)              | 1.439 Mg/m <sup>3</sup>                     |                            |
| Absorption coefficient            | 1.012 mm <sup>-1</sup>                      |                            |
| F(000)                            | 988                                         |                            |
| Crystal size                      | 0.12 x 0.10 x 0.06 mm <sup>3</sup>          |                            |
| Crystal color/habit               | colorless prism                             |                            |
| Theta range for data collection   | 3.28 to 68.36°.                             |                            |
| Index ranges                      | -13<=h<=13, -13<=k<=17, -18<=l<=18          |                            |
| Reflections collected             | 38046                                       |                            |
| Independent reflections           | 7750 [R(int) = 0.0245]                      |                            |
| Completeness to theta = 67.00°    | 97.9 %                                      |                            |
| Absorption correction             | Semi-empirical from equivalents             |                            |
| Max. and min. transmission        | 0.9418 and 0.8882                           |                            |
| Refinement method                 | Full-matrix least-squares on F <sup>2</sup> |                            |
| Data / restraints / parameters    | 7750 / 2 / 616                              |                            |
| Goodness-of-fit on F <sup>2</sup> | 1.025                                       |                            |
| Final R indices [I>2sigma(I)]     | R1 = 0.0336, wR2 = 0.0839                   |                            |
| R indices (all data)              | R1 = 0.0358, wR2 = 0.0860                   |                            |
| Largest diff. peak and hole       | 0.347 and -0.428 e.Å <sup>-3</sup>          |                            |

**Table S12.** Atomic coordinates ( $\times 10^4$ ) and equivalent isotropic displacement parameters ( $\text{\AA}^2 \times 10^3$ ) for dimer **13**.  $U(\text{eq})$  is defined as one third of the trace of the orthogonalized  $U_{ij}$  tensor.

|       | x        | y        | z        | $U(\text{eq})$ |
|-------|----------|----------|----------|----------------|
| C(1)  | 3429(1)  | 8602(1)  | -1061(1) | 15(1)          |
| C(2)  | 3980(1)  | 9348(1)  | -837(1)  | 19(1)          |
| C(3)  | 3214(1)  | 10276(1) | -813(1)  | 23(1)          |
| C(4)  | 2680(1)  | 10975(1) | -1737(1) | 24(1)          |
| C(5)  | 1339(1)  | 10712(1) | -1679(1) | 21(1)          |
| C(6)  | 1118(1)  | 10683(1) | -2592(1) | 19(1)          |
| C(7)  | 539(1)   | 11530(1) | -3256(1) | 25(1)          |
| C(8)  | 250(1)   | 11550(1) | -4085(1) | 29(1)          |
| C(9)  | 521(1)   | 10708(1) | -4264(1) | 28(1)          |
| C(10) | 1101(1)  | 9854(1)  | -3618(1) | 21(1)          |
| C(11) | 1409(1)  | 9834(1)  | -2789(1) | 16(1)          |
| C(12) | 2053(1)  | 8889(1)  | -2105(1) | 14(1)          |
| C(13) | 1359(1)  | 8350(1)  | -1019(1) | 14(1)          |
| C(14) | 40(1)    | 8052(1)  | -772(1)  | 15(1)          |
| C(15) | -934(1)  | 8796(1)  | -1026(1) | 17(1)          |
| C(16) | -2184(1) | 8542(1)  | -758(1)  | 19(1)          |
| C(17) | -2478(1) | 7542(1)  | -231(1)  | 21(1)          |
| C(18) | -1518(1) | 6801(1)  | 7(1)     | 21(1)          |
| C(19) | -254(1)  | 7039(1)  | -262(1)  | 17(1)          |
| C(20) | 754(1)   | 6223(1)  | 90(1)    | 20(1)          |
| C(21) | 860(1)   | 6037(1)  | 1135(1)  | 24(1)          |
| C(22) | 828(1)   | 6990(1)  | 1270(1)  | 21(1)          |
| C(23) | 1937(1)  | 7639(1)  | 688(1)   | 18(1)          |
| C(24) | 2159(1)  | 8174(1)  | -429(1)  | 14(1)          |
| C(25) | 3978(1)  | 5930(1)  | 7351(1)  | 15(1)          |
| C(26) | 4773(1)  | 4934(1)  | 7801(1)  | 17(1)          |
| C(27) | 5046(1)  | 4190(1)  | 7358(1)  | 20(1)          |
| C(28) | 3897(1)  | 3804(1)  | 7258(1)  | 19(1)          |
| C(29) | 3503(1)  | 4448(1)  | 6247(1)  | 18(1)          |
| C(30) | 2105(1)  | 4733(1)  | 6291(1)  | 16(1)          |
| C(31) | 1372(1)  | 4145(1)  | 6154(1)  | 18(1)          |
| C(32) | 96(1)    | 4379(1)  | 6143(1)  | 19(1)          |
| C(33) | -477(1)  | 5225(1)  | 6260(1)  | 19(1)          |
| C(34) | 234(1)   | 5821(1)  | 6398(1)  | 17(1)          |
| C(35) | 1513(1)  | 5584(1)  | 6426(1)  | 15(1)          |
| C(36) | 2235(1)  | 6247(1)  | 6613(1)  | 15(1)          |
| C(37) | 3373(1)  | 6772(1)  | 5813(1)  | 14(1)          |
| C(38) | 3215(1)  | 7417(1)  | 4777(1)  | 15(1)          |
| C(39) | 2910(1)  | 6981(1)  | 4231(1)  | 16(1)          |
| C(40) | 2760(1)  | 7563(1)  | 3262(1)  | 19(1)          |
| C(41) | 2884(1)  | 8590(1)  | 2835(1)  | 22(1)          |
| C(42) | 3171(1)  | 9030(1)  | 3374(1)  | 20(1)          |
| C(43) | 3352(1)  | 8455(1)  | 4342(1)  | 17(1)          |
| C(44) | 3813(1)  | 8938(1)  | 4859(1)  | 19(1)          |
| C(45) | 5272(1)  | 8890(1)  | 4642(1)  | 22(1)          |
| C(46) | 5902(1)  | 7866(1)  | 4735(1)  | 20(1)          |
| C(47) | 5655(1)  | 7016(1)  | 5762(1)  | 18(1)          |
| C(48) | 4355(1)  | 6612(1)  | 6240(1)  | 14(1)          |
| C(49) | 7370(1)  | 7795(1)  | 7563(1)  | 20(1)          |
| C(50) | 7342(2)  | 6677(1)  | 8115(1)  | 27(1)          |
| C(51) | 8624(2)  | 8219(1)  | 6987(1)  | 38(1)          |
| O(1)  | 3190(1)  | 9169(1)  | -2029(1) | 15(1)          |

|      |         |         |          |       |
|------|---------|---------|----------|-------|
| O(2) | 4307(1) | 7801(1) | -1021(1) | 18(1) |
| O(3) | 2324(1) | 8197(1) | -2525(1) | 16(1) |
| O(4) | 2767(1) | 5619(1) | 7463(1)  | 16(1) |
| O(5) | 3922(1) | 6492(1) | 7879(1)  | 17(1) |
| O(6) | 1363(1) | 6977(1) | 6788(1)  | 18(1) |
| O(7) | 6428(1) | 8348(1) | 7584(1)  | 23(1) |
| O(8) | 3992(1) | 5755(1) | 9811(1)  | 30(1) |
| F(1) | 4376(1) | 8819(1) | 43(1)    | 25(1) |
| F(2) | 5072(1) | 9647(1) | -1547(1) | 24(1) |
| F(3) | 3019(1) | 7073(1) | 955(1)   | 23(1) |
| F(4) | 1824(1) | 8370(1) | 1029(1)  | 23(1) |
| F(5) | 5908(1) | 5167(1) | 7851(1)  | 20(1) |
| F(6) | 4153(1) | 4458(1) | 8778(1)  | 20(1) |
| F(7) | 6477(1) | 6208(1) | 5733(1)  | 25(1) |
| F(8) | 6049(1) | 7275(1) | 6387(1)  | 27(1) |

**Table S13.** Bond lengths [ $\text{\AA}$ ] and angles [ $^\circ$ ] for dimer **13**.

|             |            |              |            |
|-------------|------------|--------------|------------|
| C(1)-O(2)   | 1.3985(15) | C(17)-H(17)  | 0.9500     |
| C(1)-O(1)   | 1.4156(16) | C(18)-C(19)  | 1.3954(19) |
| C(1)-C(24)  | 1.5252(17) | C(18)-H(18)  | 0.9500     |
| C(1)-C(2)   | 1.5522(18) | C(19)-C(20)  | 1.5085(19) |
| C(2)-F(1)   | 1.3706(16) | C(20)-C(21)  | 1.541(2)   |
| C(2)-F(2)   | 1.3752(16) | C(20)-H(20A) | 0.9900     |
| C(2)-C(3)   | 1.5126(19) | C(20)-H(20B) | 0.9900     |
| C(3)-C(4)   | 1.532(2)   | C(21)-C(22)  | 1.527(2)   |
| C(3)-H(3A)  | 0.9900     | C(21)-H(21A) | 0.9900     |
| C(3)-H(3B)  | 0.9900     | C(21)-H(21B) | 0.9900     |
| C(4)-C(5)   | 1.5516(19) | C(22)-C(23)  | 1.5033(19) |
| C(4)-H(4A)  | 0.9900     | C(22)-H(22A) | 0.9900     |
| C(4)-H(4B)  | 0.9900     | C(22)-H(22B) | 0.9900     |
| C(5)-C(6)   | 1.512(2)   | C(23)-F(3)   | 1.3780(15) |
| C(5)-H(5A)  | 0.9900     | C(23)-F(4)   | 1.3924(16) |
| C(5)-H(5B)  | 0.9900     | C(23)-C(24)  | 1.5081(18) |
| C(6)-C(7)   | 1.398(2)   | C(25)-O(5)   | 1.3991(15) |
| C(6)-C(11)  | 1.408(2)   | C(25)-O(4)   | 1.4197(15) |
| C(7)-C(8)   | 1.382(2)   | C(25)-C(48)  | 1.5317(17) |
| C(7)-H(7)   | 0.9500     | C(25)-C(26)  | 1.5524(18) |
| C(8)-C(9)   | 1.380(2)   | C(26)-F(5)   | 1.3743(15) |
| C(8)-H(8)   | 0.9500     | C(26)-F(6)   | 1.3806(15) |
| C(9)-C(10)  | 1.392(2)   | C(26)-C(27)  | 1.5097(18) |
| C(9)-H(9)   | 0.9500     | C(27)-C(28)  | 1.5353(19) |
| C(10)-C(11) | 1.392(2)   | C(27)-H(27A) | 0.9900     |
| C(10)-H(10) | 0.9500     | C(27)-H(27B) | 0.9900     |
| C(11)-C(12) | 1.5218(17) | C(28)-C(29)  | 1.5493(18) |
| C(12)-O(3)  | 1.4131(15) | C(28)-H(28A) | 0.9900     |
| C(12)-O(1)  | 1.4243(15) | C(28)-H(28B) | 0.9900     |
| C(12)-C(13) | 1.5372(17) | C(29)-C(30)  | 1.5137(18) |
| C(13)-C(24) | 1.3353(18) | C(29)-H(29A) | 0.9900     |
| C(13)-C(14) | 1.4854(17) | C(29)-H(29B) | 0.9900     |
| C(14)-C(15) | 1.4011(18) | C(30)-C(31)  | 1.3958(19) |
| C(14)-C(19) | 1.4025(19) | C(30)-C(35)  | 1.4108(19) |
| C(15)-C(16) | 1.3876(19) | C(31)-C(32)  | 1.387(2)   |
| C(15)-H(15) | 0.9500     | C(31)-H(31)  | 0.9500     |
| C(16)-C(17) | 1.387(2)   | C(32)-C(33)  | 1.387(2)   |
| C(16)-H(16) | 0.9500     | C(32)-H(32)  | 0.9500     |
| C(17)-C(18) | 1.385(2)   | C(33)-C(34)  | 1.389(2)   |

|                  |            |                   |            |
|------------------|------------|-------------------|------------|
| C(33)-H(33)      | 0.9500     | C(45)-H(45A)      | 0.9900     |
| C(34)-C(35)      | 1.3953(19) | C(45)-H(45B)      | 0.9900     |
| C(34)-H(34)      | 0.9500     | C(46)-C(47)       | 1.5078(19) |
| C(35)-C(36)      | 1.5245(18) | C(46)-H(46A)      | 0.9900     |
| C(36)-O(6)       | 1.4063(15) | C(46)-H(46B)      | 0.9900     |
| C(36)-O(4)       | 1.4297(15) | C(47)-F(8)        | 1.3702(15) |
| C(36)-C(37)      | 1.5328(18) | C(47)-F(7)        | 1.3960(16) |
| C(37)-C(48)      | 1.3360(19) | C(47)-C(48)       | 1.5086(18) |
| C(37)-C(38)      | 1.4866(18) | C(49)-O(7)        | 1.2172(17) |
| C(38)-C(39)      | 1.4016(18) | C(49)-C(51)       | 1.492(2)   |
| C(38)-C(43)      | 1.402(2)   | C(49)-C(50)       | 1.496(2)   |
| C(39)-C(40)      | 1.3865(19) | C(50)-H(50A)      | 0.9800     |
| C(39)-H(39)      | 0.9500     | C(50)-H(50B)      | 0.9800     |
| C(40)-C(41)      | 1.385(2)   | C(50)-H(50C)      | 0.9800     |
| C(40)-H(40)      | 0.9500     | C(51)-H(51A)      | 0.9800     |
| C(41)-C(42)      | 1.388(2)   | C(51)-H(51B)      | 0.9800     |
| C(41)-H(41)      | 0.9500     | C(51)-H(51C)      | 0.9800     |
| C(42)-C(43)      | 1.3950(19) | O(2)-H(2)         | 0.8400     |
| C(42)-H(42)      | 0.9500     | O(3)-H(3)         | 0.8400     |
| C(43)-C(44)      | 1.5053(19) | O(5)-H(5)         | 0.8400     |
| C(44)-C(45)      | 1.5428(19) | O(6)-H(6)         | 0.8400     |
| C(44)-H(44A)     | 0.9900     | O(8)-H(8X)        | 0.832(5)   |
| C(44)-H(44B)     | 0.9900     | O(8)-H(8Y)        | 0.827(5)   |
| C(45)-C(46)      | 1.534(2)   |                   |            |
| O(2)-C(1)-O(1)   | 111.07(10) | C(8)-C(7)-C(6)    | 122.10(14) |
| O(2)-C(1)-C(24)  | 108.33(10) | C(8)-C(7)-H(7)    | 118.9      |
| O(1)-C(1)-C(24)  | 104.19(10) | C(6)-C(7)-H(7)    | 118.9      |
| O(2)-C(1)-C(2)   | 110.04(10) | C(9)-C(8)-C(7)    | 119.58(14) |
| O(1)-C(1)-C(2)   | 105.02(10) | C(9)-C(8)-H(8)    | 120.2      |
| C(24)-C(1)-C(2)  | 117.96(11) | C(7)-C(8)-H(8)    | 120.2      |
| F(1)-C(2)-F(2)   | 104.94(10) | C(8)-C(9)-C(10)   | 119.74(14) |
| F(1)-C(2)-C(3)   | 108.27(11) | C(8)-C(9)-H(9)    | 120.1      |
| F(2)-C(2)-C(3)   | 108.30(11) | C(10)-C(9)-H(9)   | 120.1      |
| F(1)-C(2)-C(1)   | 108.14(11) | C(11)-C(10)-C(9)  | 120.89(14) |
| F(2)-C(2)-C(1)   | 105.01(10) | C(11)-C(10)-H(10) | 119.6      |
| C(3)-C(2)-C(1)   | 121.05(11) | C(9)-C(10)-H(10)  | 119.6      |
| C(2)-C(3)-C(4)   | 116.51(12) | C(10)-C(11)-C(6)  | 119.79(12) |
| C(2)-C(3)-H(3A)  | 108.2      | C(10)-C(11)-C(12) | 119.39(12) |
| C(4)-C(3)-H(3A)  | 108.2      | C(6)-C(11)-C(12)  | 120.82(12) |
| C(2)-C(3)-H(3B)  | 108.2      | O(3)-C(12)-O(1)   | 110.55(10) |
| C(4)-C(3)-H(3B)  | 108.2      | O(3)-C(12)-C(11)  | 108.53(10) |
| H(3A)-C(3)-H(3B) | 107.3      | O(1)-C(12)-C(11)  | 107.60(10) |
| C(3)-C(4)-C(5)   | 112.93(12) | O(3)-C(12)-C(13)  | 108.48(10) |
| C(3)-C(4)-H(4A)  | 109.0      | O(1)-C(12)-C(13)  | 103.63(10) |
| C(5)-C(4)-H(4A)  | 109.0      | C(11)-C(12)-C(13) | 117.90(10) |
| C(3)-C(4)-H(4B)  | 109.0      | C(24)-C(13)-C(14) | 130.27(12) |
| C(5)-C(4)-H(4B)  | 109.0      | C(24)-C(13)-C(12) | 108.75(11) |
| H(4A)-C(4)-H(4B) | 107.8      | C(14)-C(13)-C(12) | 120.85(11) |
| C(6)-C(5)-C(4)   | 116.48(12) | C(15)-C(14)-C(19) | 119.41(12) |
| C(6)-C(5)-H(5A)  | 108.2      | C(15)-C(14)-C(13) | 119.47(12) |
| C(4)-C(5)-H(5A)  | 108.2      | C(19)-C(14)-C(13) | 121.10(12) |
| C(6)-C(5)-H(5B)  | 108.2      | C(16)-C(15)-C(14) | 120.69(13) |
| C(4)-C(5)-H(5B)  | 108.2      | C(16)-C(15)-H(15) | 119.7      |
| H(5A)-C(5)-H(5B) | 107.3      | C(14)-C(15)-H(15) | 119.7      |
| C(7)-C(6)-C(11)  | 117.88(13) | C(17)-C(16)-C(15) | 119.93(13) |
| C(7)-C(6)-C(5)   | 118.35(13) | C(17)-C(16)-H(16) | 120.0      |
| C(11)-C(6)-C(5)  | 123.71(12) | C(15)-C(16)-H(16) | 120.0      |

|                     |            |                     |            |
|---------------------|------------|---------------------|------------|
| C(18)-C(17)-C(16)   | 119.67(13) | C(29)-C(28)-H(28B)  | 109.0      |
| C(18)-C(17)-H(17)   | 120.2      | H(28A)-C(28)-H(28B) | 107.8      |
| C(16)-C(17)-H(17)   | 120.2      | C(30)-C(29)-C(28)   | 115.96(11) |
| C(17)-C(18)-C(19)   | 121.37(13) | C(30)-C(29)-H(29A)  | 108.3      |
| C(17)-C(18)-H(18)   | 119.3      | C(28)-C(29)-H(29A)  | 108.3      |
| C(19)-C(18)-H(18)   | 119.3      | C(30)-C(29)-H(29B)  | 108.3      |
| C(18)-C(19)-C(14)   | 118.90(13) | C(28)-C(29)-H(29B)  | 108.3      |
| C(18)-C(19)-C(20)   | 119.88(12) | H(29A)-C(29)-H(29B) | 107.4      |
| C(14)-C(19)-C(20)   | 120.88(12) | C(31)-C(30)-C(35)   | 118.19(12) |
| C(19)-C(20)-C(21)   | 109.64(11) | C(31)-C(30)-C(29)   | 118.34(12) |
| C(19)-C(20)-H(20A)  | 109.7      | C(35)-C(30)-C(29)   | 123.42(12) |
| C(21)-C(20)-H(20A)  | 109.7      | C(32)-C(31)-C(30)   | 121.92(13) |
| C(19)-C(20)-H(20B)  | 109.7      | C(32)-C(31)-H(31)   | 119.0      |
| C(21)-C(20)-H(20B)  | 109.7      | C(30)-C(31)-H(31)   | 119.0      |
| H(20A)-C(20)-H(20B) | 108.2      | C(31)-C(32)-C(33)   | 119.68(12) |
| C(22)-C(21)-C(20)   | 114.52(11) | C(31)-C(32)-H(32)   | 120.2      |
| C(22)-C(21)-H(21A)  | 108.6      | C(33)-C(32)-H(32)   | 120.2      |
| C(20)-C(21)-H(21A)  | 108.6      | C(32)-C(33)-C(34)   | 119.42(12) |
| C(22)-C(21)-H(21B)  | 108.6      | C(32)-C(33)-H(33)   | 120.3      |
| C(20)-C(21)-H(21B)  | 108.6      | C(34)-C(33)-H(33)   | 120.3      |
| H(21A)-C(21)-H(21B) | 107.6      | C(33)-C(34)-C(35)   | 121.34(13) |
| C(23)-C(22)-C(21)   | 116.16(12) | C(33)-C(34)-H(34)   | 119.3      |
| C(23)-C(22)-H(22A)  | 108.2      | C(35)-C(34)-H(34)   | 119.3      |
| C(21)-C(22)-H(22A)  | 108.2      | C(34)-C(35)-C(30)   | 119.44(12) |
| C(23)-C(22)-H(22B)  | 108.2      | C(34)-C(35)-C(36)   | 118.99(12) |
| C(21)-C(22)-H(22B)  | 108.2      | C(30)-C(35)-C(36)   | 121.57(11) |
| H(22A)-C(22)-H(22B) | 107.4      | O(6)-C(36)-O(4)     | 111.05(10) |
| F(3)-C(23)-F(4)     | 104.41(10) | O(6)-C(36)-C(35)    | 107.52(10) |
| F(3)-C(23)-C(22)    | 108.26(11) | O(4)-C(36)-C(35)    | 107.58(10) |
| F(4)-C(23)-C(22)    | 106.98(11) | O(6)-C(36)-C(37)    | 108.82(10) |
| F(3)-C(23)-C(24)    | 108.70(10) | O(4)-C(36)-C(37)    | 103.78(10) |
| F(4)-C(23)-C(24)    | 107.03(11) | C(35)-C(36)-C(37)   | 118.04(10) |
| C(22)-C(23)-C(24)   | 120.34(11) | C(48)-C(37)-C(38)   | 131.06(12) |
| C(13)-C(24)-C(23)   | 128.76(12) | C(48)-C(37)-C(36)   | 108.96(11) |
| C(13)-C(24)-C(1)    | 109.41(11) | C(38)-C(37)-C(36)   | 119.68(11) |
| C(23)-C(24)-C(1)    | 121.83(11) | C(39)-C(38)-C(43)   | 119.51(12) |
| O(5)-C(25)-O(4)     | 111.59(10) | C(39)-C(38)-C(37)   | 119.46(12) |
| O(5)-C(25)-C(48)    | 108.71(10) | C(43)-C(38)-C(37)   | 121.03(12) |
| O(4)-C(25)-C(48)    | 104.03(10) | C(40)-C(39)-C(38)   | 120.76(12) |
| O(5)-C(25)-C(26)    | 109.49(10) | C(40)-C(39)-H(39)   | 119.6      |
| O(4)-C(25)-C(26)    | 104.31(10) | C(38)-C(39)-H(39)   | 119.6      |
| C(48)-C(25)-C(26)   | 118.51(11) | C(41)-C(40)-C(39)   | 119.77(13) |
| F(5)-C(26)-F(6)     | 104.58(10) | C(41)-C(40)-H(40)   | 120.1      |
| F(5)-C(26)-C(27)    | 107.84(10) | C(39)-C(40)-H(40)   | 120.1      |
| F(6)-C(26)-C(27)    | 108.51(11) | C(40)-C(41)-C(42)   | 119.87(13) |
| F(5)-C(26)-C(25)    | 108.02(10) | C(40)-C(41)-H(41)   | 120.1      |
| F(6)-C(26)-C(25)    | 105.00(10) | C(42)-C(41)-H(41)   | 120.1      |
| C(27)-C(26)-C(25)   | 121.65(11) | C(41)-C(42)-C(43)   | 121.24(13) |
| C(26)-C(27)-C(28)   | 116.61(11) | C(41)-C(42)-H(42)   | 119.4      |
| C(26)-C(27)-H(27A)  | 108.1      | C(43)-C(42)-H(42)   | 119.4      |
| C(28)-C(27)-H(27A)  | 108.1      | C(42)-C(43)-C(38)   | 118.83(12) |
| C(26)-C(27)-H(27B)  | 108.1      | C(42)-C(43)-C(44)   | 119.64(12) |
| C(28)-C(27)-H(27B)  | 108.1      | C(38)-C(43)-C(44)   | 121.24(12) |
| H(27A)-C(27)-H(27B) | 107.3      | C(43)-C(44)-C(45)   | 110.51(11) |
| C(27)-C(28)-C(29)   | 113.04(11) | C(43)-C(44)-H(44A)  | 109.5      |
| C(27)-C(28)-H(28A)  | 109.0      | C(45)-C(44)-H(44A)  | 109.5      |
| C(29)-C(28)-H(28A)  | 109.0      | C(43)-C(44)-H(44B)  | 109.5      |
| C(27)-C(28)-H(28B)  | 109.0      | C(45)-C(44)-H(44B)  | 109.5      |

|                     |            |
|---------------------|------------|
| H(44A)-C(44)-H(44B) | 108.1      |
| C(46)-C(45)-C(44)   | 114.66(11) |
| C(46)-C(45)-H(45A)  | 108.6      |
| C(44)-C(45)-H(45A)  | 108.6      |
| C(46)-C(45)-H(45B)  | 108.6      |
| C(44)-C(45)-H(45B)  | 108.6      |
| H(45A)-C(45)-H(45B) | 107.6      |
| C(47)-C(46)-C(45)   | 115.66(11) |
| C(47)-C(46)-H(46A)  | 108.4      |
| C(45)-C(46)-H(46A)  | 108.4      |
| C(47)-C(46)-H(46B)  | 108.4      |
| C(45)-C(46)-H(46B)  | 108.4      |
| H(46A)-C(46)-H(46B) | 107.4      |
| F(8)-C(47)-F(7)     | 104.33(10) |
| F(8)-C(47)-C(46)    | 108.23(11) |
| F(7)-C(47)-C(46)    | 106.98(11) |
| F(8)-C(47)-C(48)    | 109.01(10) |
| F(7)-C(47)-C(48)    | 106.54(11) |
| C(46)-C(47)-C(48)   | 120.57(11) |
| C(37)-C(48)-C(47)   | 128.25(12) |
| C(37)-C(48)-C(25)   | 109.48(11) |
| C(47)-C(48)-C(25)   | 122.26(11) |
| O(7)-C(49)-C(51)    | 120.45(14) |
| O(7)-C(49)-C(50)    | 122.53(13) |
| C(51)-C(49)-C(50)   | 117.02(13) |
| C(49)-C(50)-H(50A)  | 109.5      |
| C(49)-C(50)-H(50B)  | 109.5      |
| H(50A)-C(50)-H(50B) | 109.5      |
| C(49)-C(50)-H(50C)  | 109.5      |
| H(50A)-C(50)-H(50C) | 109.5      |
| H(50B)-C(50)-H(50C) | 109.5      |
| C(49)-C(51)-H(51A)  | 109.5      |
| C(49)-C(51)-H(51B)  | 109.5      |
| H(51A)-C(51)-H(51B) | 109.5      |
| C(49)-C(51)-H(51C)  | 109.5      |
| H(51A)-C(51)-H(51C) | 109.5      |
| H(51B)-C(51)-H(51C) | 109.5      |
| C(1)-O(1)-C(12)     | 110.73(9)  |
| C(1)-O(2)-H(2)      | 109.5      |
| C(12)-O(3)-H(3)     | 109.5      |
| C(25)-O(4)-C(36)    | 110.81(9)  |
| C(25)-O(5)-H(5)     | 109.5      |
| C(36)-O(6)-H(6)     | 109.5      |
| H(8X)-O(8)-H(8Y)    | 95.4(18)   |

**Table S14.** Anisotropic displacement parameters ( $\text{\AA}^2 \times 10^3$ ) for dimer **13**. The anisotropic displacement factor exponent takes the form:  $-2p^2 [ h^2 a^* 2U^{11} + \dots + 2 h k a^* b^* U^{12} ]$

|       | $U^{11}$ | $U^{22}$ | $U^{33}$ | $U^{23}$ | $U^{13}$ | $U^{12}$ |
|-------|----------|----------|----------|----------|----------|----------|
| C(1)  | 15(1)    | 15(1)    | 17(1)    | -8(1)    | -3(1)    | 0(1)     |
| C(2)  | 15(1)    | 23(1)    | 24(1)    | -13(1)   | -4(1)    | -3(1)    |
| C(3)  | 20(1)    | 24(1)    | 33(1)    | -20(1)   | -3(1)    | -4(1)    |
| C(4)  | 22(1)    | 16(1)    | 35(1)    | -14(1)   | -3(1)    | -3(1)    |
| C(5)  | 18(1)    | 15(1)    | 30(1)    | -13(1)   | -3(1)    | 1(1)     |
| C(6)  | 13(1)    | 14(1)    | 23(1)    | -5(1)    | 0(1)     | -3(1)    |
| C(7)  | 19(1)    | 14(1)    | 32(1)    | -5(1)    | -1(1)    | 0(1)     |
| C(8)  | 24(1)    | 20(1)    | 27(1)    | 2(1)     | -6(1)    | 3(1)     |
| C(9)  | 27(1)    | 29(1)    | 19(1)    | -3(1)    | -7(1)    | 1(1)     |
| C(10) | 20(1)    | 20(1)    | 18(1)    | -6(1)    | -2(1)    | 0(1)     |
| C(11) | 13(1)    | 14(1)    | 16(1)    | -4(1)    | 0(1)     | -2(1)    |
| C(12) | 13(1)    | 13(1)    | 17(1)    | -8(1)    | -2(1)    | -1(1)    |
| C(13) | 16(1)    | 10(1)    | 16(1)    | -6(1)    | -2(1)    | 0(1)     |
| C(14) | 15(1)    | 18(1)    | 13(1)    | -8(1)    | -3(1)    | -3(1)    |
| C(15) | 18(1)    | 16(1)    | 17(1)    | -8(1)    | -4(1)    | -2(1)    |
| C(16) | 16(1)    | 24(1)    | 20(1)    | -12(1)   | -5(1)    | 1(1)     |
| C(17) | 16(1)    | 29(1)    | 21(1)    | -13(1)   | -2(1)    | -6(1)    |
| C(18) | 22(1)    | 20(1)    | 21(1)    | -9(1)    | -2(1)    | -7(1)    |
| C(19) | 19(1)    | 17(1)    | 16(1)    | -9(1)    | -3(1)    | -3(1)    |
| C(20) | 21(1)    | 14(1)    | 23(1)    | -7(1)    | -4(1)    | -2(1)    |
| C(21) | 25(1)    | 18(1)    | 21(1)    | -2(1)    | -5(1)    | -3(1)    |
| C(22) | 22(1)    | 23(1)    | 14(1)    | -6(1)    | -3(1)    | -2(1)    |
| C(23) | 18(1)    | 19(1)    | 18(1)    | -10(1)   | -7(1)    | 2(1)     |
| C(24) | 14(1)    | 11(1)    | 18(1)    | -8(1)    | -3(1)    | 0(1)     |
| C(25) | 16(1)    | 15(1)    | 16(1)    | -8(1)    | -4(1)    | -1(1)    |
| C(26) | 17(1)    | 17(1)    | 18(1)    | -7(1)    | -6(1)    | -1(1)    |
| C(27) | 20(1)    | 16(1)    | 26(1)    | -11(1)   | -9(1)    | 4(1)     |
| C(28) | 22(1)    | 13(1)    | 24(1)    | -9(1)    | -7(1)    | 1(1)     |
| C(29) | 18(1)    | 16(1)    | 21(1)    | -11(1)   | -4(1)    | 0(1)     |
| C(30) | 18(1)    | 15(1)    | 14(1)    | -5(1)    | -3(1)    | -2(1)    |
| C(31) | 24(1)    | 14(1)    | 15(1)    | -5(1)    | -4(1)    | -3(1)    |
| C(32) | 23(1)    | 20(1)    | 14(1)    | -4(1)    | -5(1)    | -9(1)    |
| C(33) | 17(1)    | 23(1)    | 16(1)    | -5(1)    | -5(1)    | -3(1)    |
| C(34) | 17(1)    | 17(1)    | 14(1)    | -4(1)    | -3(1)    | -1(1)    |
| C(35) | 17(1)    | 14(1)    | 12(1)    | -3(1)    | -3(1)    | -3(1)    |
| C(36) | 16(1)    | 13(1)    | 15(1)    | -6(1)    | -4(1)    | 1(1)     |
| C(37) | 16(1)    | 11(1)    | 17(1)    | -8(1)    | -2(1)    | 0(1)     |
| C(38) | 12(1)    | 16(1)    | 16(1)    | -7(1)    | -2(1)    | 0(1)     |
| C(39) | 15(1)    | 14(1)    | 19(1)    | -7(1)    | -3(1)    | -1(1)    |
| C(40) | 19(1)    | 23(1)    | 20(1)    | -11(1)   | -6(1)    | 0(1)     |
| C(41) | 23(1)    | 21(1)    | 16(1)    | -4(1)    | -6(1)    | 1(1)     |
| C(42) | 21(1)    | 14(1)    | 21(1)    | -4(1)    | -3(1)    | -1(1)    |
| C(43) | 14(1)    | 17(1)    | 18(1)    | -8(1)    | -1(1)    | 0(1)     |
| C(44) | 24(1)    | 14(1)    | 21(1)    | -8(1)    | -3(1)    | -2(1)    |
| C(45) | 24(1)    | 19(1)    | 25(1)    | -9(1)    | -4(1)    | -7(1)    |
| C(46) | 17(1)    | 23(1)    | 21(1)    | -11(1)   | -1(1)    | -5(1)    |
| C(47) | 16(1)    | 20(1)    | 21(1)    | -11(1)   | -5(1)    | -1(1)    |
| C(48) | 18(1)    | 11(1)    | 16(1)    | -8(1)    | -3(1)    | 0(1)     |
| C(49) | 22(1)    | 22(1)    | 20(1)    | -13(1)   | -5(1)    | 0(1)     |
| C(50) | 33(1)    | 21(1)    | 29(1)    | -12(1)   | -10(1)   | 0(1)     |
| C(51) | 28(1)    | 29(1)    | 47(1)    | -16(1)   | 9(1)     | -1(1)    |
| O(1)  | 13(1)    | 14(1)    | 17(1)    | -7(1)    | -2(1)    | -2(1)    |



|      |       |       |       |        |        |        |
|------|-------|-------|-------|--------|--------|--------|
| O(2) | 14(1) | 17(1) | 22(1) | -10(1) | -3(1)  | 2(1)   |
| O(3) | 19(1) | 15(1) | 17(1) | -9(1)  | -6(1)  | 3(1)   |
| O(4) | 16(1) | 16(1) | 15(1) | -6(1)  | -4(1)  | -2(1)  |
| O(5) | 24(1) | 14(1) | 15(1) | -8(1)  | -6(1)  | 1(1)   |
| O(6) | 16(1) | 18(1) | 24(1) | -13(1) | -5(1)  | 2(1)   |
| O(7) | 20(1) | 23(1) | 28(1) | -14(1) | -4(1)  | 1(1)   |
| O(8) | 43(1) | 21(1) | 19(1) | -7(1)  | -4(1)  | 9(1)   |
| F(1) | 23(1) | 31(1) | 29(1) | -17(1) | -11(1) | -1(1)  |
| F(2) | 14(1) | 27(1) | 34(1) | -18(1) | 0(1)   | -6(1)  |
| F(3) | 21(1) | 27(1) | 20(1) | -8(1)  | -10(1) | 4(1)   |
| F(4) | 28(1) | 28(1) | 21(1) | -16(1) | -5(1)  | -3(1)  |
| F(5) | 19(1) | 18(1) | 26(1) | -10(1) | -10(1) | 1(1)   |
| F(6) | 26(1) | 16(1) | 17(1) | -4(1)  | -6(1)  | -1(1)  |
| F(7) | 17(1) | 24(1) | 28(1) | -9(1)  | -3(1)  | 3(1)   |
| F(8) | 27(1) | 35(1) | 23(1) | -13(1) | -7(1)  | -12(1) |

**Table S15.** Hydrogen coordinates ( $\times 10^4$ ) and isotropic displacement parameters ( $\text{\AA}^2 \times 10^3$ ) for dimer **13**.

|        | x     | y     | z     | U(eq) |
|--------|-------|-------|-------|-------|
| H(3A)  | 3753  | 10668 | -701  | 27    |
| H(3B)  | 2498  | 10059 | -235  | 27    |
| H(4A)  | 3259  | 10936 | -2327 | 28    |
| H(4B)  | 2645  | 11675 | -1822 | 28    |
| H(5A)  | 1159  | 10047 | -1112 | 25    |
| H(5B)  | 718   | 11210 | -1530 | 25    |
| H(7)   | 338   | 12109 | -3135 | 30    |
| H(8)   | -132  | 12140 | -4529 | 35    |
| H(9)   | 313   | 10712 | -4826 | 33    |
| H(10)  | 1290  | 9276  | -3745 | 25    |
| H(15)  | -737  | 9482  | -1384 | 20    |
| H(16)  | -2836 | 9051  | -936  | 23    |
| H(17)  | -3334 | 7366  | -34   | 25    |
| H(18)  | -1724 | 6117  | 360   | 25    |
| H(20A) | 1576  | 6424  | -375  | 24    |
| H(20B) | 536   | 5597  | 109   | 24    |
| H(21A) | 156   | 5626  | 1625  | 28    |
| H(21B) | 1660  | 5643  | 1281  | 28    |
| H(22A) | 49    | 7399  | 1086  | 25    |
| H(22B) | 765   | 6794  | 1983  | 25    |
| H(27A) | 5538  | 3605  | 7770  | 23    |
| H(27B) | 5592  | 4506  | 6690  | 23    |
| H(28A) | 3175  | 3797  | 7798  | 23    |
| H(28B) | 4098  | 3104  | 7340  | 23    |
| H(29A) | 3967  | 5073  | 5906  | 21    |
| H(29B) | 3779  | 4075  | 5834  | 21    |
| H(31)  | 1758  | 3568  | 6066  | 22    |
| H(32)  | -383  | 3962  | 6056  | 23    |
| H(33)  | -1348 | 5396  | 6247  | 23    |
| H(34)  | -159  | 6403  | 6475  | 20    |
| H(39)  | 2804  | 6279  | 4528  | 20    |
| H(40)  | 2574  | 7258  | 2893  | 23    |
| H(41)  | 2773  | 8992  | 2174  | 26    |
| H(42)  | 3245  | 9735  | 3079  | 24    |
| H(44A) | 3487  | 8588  | 5584  | 23    |

|        |          |          |          |    |
|--------|----------|----------|----------|----|
| H(44B) | 3488     | 9647     | 4629     | 23 |
| H(45A) | 5577     | 9402     | 3960     | 27 |
| H(45B) | 5546     | 9068     | 5104     | 27 |
| H(46A) | 5609     | 7684     | 4284     | 23 |
| H(46B) | 6827     | 7935     | 4504     | 23 |
| H(50A) | 6511     | 6494     | 8556     | 40 |
| H(50B) | 7999     | 6420     | 8511     | 40 |
| H(50C) | 7497     | 6384     | 7642     | 40 |
| H(51A) | 8529     | 8954     | 6685     | 57 |
| H(51B) | 8947     | 7989     | 6466     | 57 |
| H(51C) | 9219     | 7994     | 7433     | 57 |
| H(2)   | 4943     | 8013     | -1482    | 27 |
| H(3)   | 2864     | 7756     | -2259    | 24 |
| H(5)   | 3889     | 6104     | 8482     | 25 |
| H(6)   | 1714     | 7305     | 6968     | 27 |
| H(8X)  | 4117(18) | 6322(7)  | 9734(14) | 32 |
| H(8Y)  | 3926(18) | 5485(13) | 10420(4) | 32 |

---

## Dimer 14

A colorless prism 0.12 x 0.10 x 0.05 mm in size was mounted on a Cryoloop with Paratone oil. Data were collected in a nitrogen gas stream at 100(2) K using phi and omega scans. Crystal-to-detector distance was 60 mm and exposure time was 5 seconds per frame using a scan width of 1.0°. Data collection was 97.7% complete to 67.00° in  $\theta$ . A total of 16000 reflections were collected covering the indices,  $-9 \leq h \leq 9$ ,  $-10 \leq k \leq 10$ ,  $-17 \leq l \leq 16$ . 3374 reflections were found to be symmetry independent, with an  $R_{\text{int}}$  of 0.0180. Indexing and unit cell refinement indicated a primitive, triclinic lattice. The space group was found to be P-1 (No. 2). The data were integrated using the Bruker SAINT software program and scaled using the SADABS software program. Solution by direct methods (SIR-2008) produced a complete heavy-atom phasing model consistent with the proposed structure. All non-hydrogen atoms were refined anisotropically by full-matrix least-squares (SHELXL-97). All hydrogen atoms were placed using a riding model. Their positions were constrained relative to their parent atom using the appropriate HFIX command in SHELXL-97.

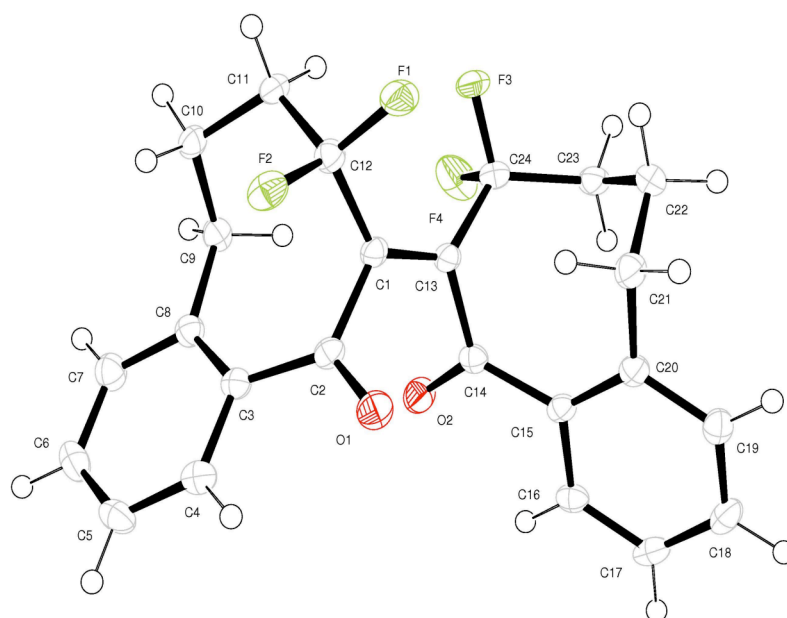

**Figure S15.** X-ray structure of dimer 14 with carbon, fluorine, and oxygen atoms labeled. ORTEPs are shown for 50% probability.

**Table S16.** Crystal data and structure refinement for dimer **14**.

---

|                                   |                                                               |                             |
|-----------------------------------|---------------------------------------------------------------|-----------------------------|
| Empirical formula                 | C <sub>24</sub> H <sub>20</sub> F <sub>4</sub> O <sub>2</sub> |                             |
| Formula weight                    | 416.40                                                        |                             |
| Temperature                       | 100(2) K                                                      |                             |
| Wavelength                        | 1.54178 Å                                                     |                             |
| Crystal system                    | Triclinic                                                     |                             |
| Space group                       | P-1                                                           |                             |
| Unit cell dimensions              | a = 7.5863(4) Å                                               | $\alpha = 91.070(3)^\circ$  |
|                                   | b = 8.9598(5) Å                                               | $\beta = 96.218(2)^\circ$   |
|                                   | c = 14.6268(8) Å                                              | $\gamma = 104.754(3)^\circ$ |
| Volume                            | 954.66(9) Å <sup>3</sup>                                      |                             |
| Z                                 | 2                                                             |                             |
| Density (calculated)              | 1.449 Mg/m <sup>3</sup>                                       |                             |
| Absorption coefficient            | 0.999 mm <sup>-1</sup>                                        |                             |
| F(000)                            | 432                                                           |                             |
| Crystal size                      | 0.12 x 0.10 x 0.05 mm <sup>3</sup>                            |                             |
| Crystal color/habit               | colorless prism                                               |                             |
| Theta range for data collection   | 3.04 to 68.25°.                                               |                             |
| Index ranges                      | -9 ≤ h ≤ 9, -10 ≤ k ≤ 10, -17 ≤ l ≤ 16                        |                             |
| Reflections collected             | 16000                                                         |                             |
| Independent reflections           | 3374 [R(int) = 0.0180]                                        |                             |
| Completeness to theta = 67.00°    | 97.7 %                                                        |                             |
| Absorption correction             | Semi-empirical from equivalents                               |                             |
| Max. and min. transmission        | 0.9517 and 0.8895                                             |                             |
| Refinement method                 | Full-matrix least-squares on F <sup>2</sup>                   |                             |
| Data / restraints / parameters    | 3374 / 0 / 271                                                |                             |
| Goodness-of-fit on F <sup>2</sup> | 1.036                                                         |                             |
| Final R indices [I > 2σ(I)]       | R1 = 0.0322, wR2 = 0.0853                                     |                             |
| R indices (all data)              | R1 = 0.0351, wR2 = 0.0883                                     |                             |
| Largest diff. peak and hole       | 0.272 and -0.204 e.Å <sup>-3</sup>                            |                             |

**Table S17.** Atomic coordinates ( $\times 10^4$ ) and equivalent isotropic displacement parameters ( $\text{\AA}^2 \times 10^3$ ) for dimer **14**.  $U(\text{eq})$  is defined as one third of the trace of the orthogonalized  $U_{ij}$  tensor.

|       | x        | y       | z        | $U(\text{eq})$ |
|-------|----------|---------|----------|----------------|
| C(1)  | 12252(2) | 2961(1) | 6896(1)  | 18(1)          |
| C(2)  | 12516(2) | 1932(1) | 7688(1)  | 19(1)          |
| C(3)  | 14068(2) | 1181(1) | 7779(1)  | 18(1)          |
| C(4)  | 14073(2) | 193(1)  | 8511(1)  | 22(1)          |
| C(5)  | 15486(2) | -508(2) | 8708(1)  | 26(1)          |
| C(6)  | 16916(2) | -244(2) | 8167(1)  | 28(1)          |
| C(7)  | 16912(2) | 713(2)  | 7436(1)  | 26(1)          |
| C(8)  | 15515(2) | 1449(1) | 7221(1)  | 20(1)          |
| C(9)  | 15678(2) | 2433(2) | 6387(1)  | 21(1)          |
| C(10) | 14448(2) | 1616(2) | 5515(1)  | 23(1)          |
| C(11) | 12760(2) | 2208(2) | 5238(1)  | 21(1)          |
| C(12) | 11502(2) | 2072(1) | 5977(1)  | 21(1)          |
| C(13) | 12558(2) | 4474(1) | 7096(1)  | 18(1)          |
| C(14) | 13326(2) | 5058(1) | 8084(1)  | 18(1)          |
| C(15) | 12265(2) | 5722(1) | 8711(1)  | 18(1)          |
| C(16) | 13174(2) | 6194(1) | 9597(1)  | 20(1)          |
| C(17) | 12371(2) | 6865(1) | 10240(1) | 23(1)          |
| C(18) | 10646(2) | 7100(2) | 10005(1) | 25(1)          |
| C(19) | 9720(2)  | 6609(1) | 9142(1)  | 22(1)          |
| C(20) | 10479(2) | 5894(1) | 8482(1)  | 19(1)          |
| C(21) | 9325(2)  | 5367(2) | 7574(1)  | 24(1)          |
| C(22) | 9776(2)  | 6534(2) | 6819(1)  | 30(1)          |
| C(23) | 11806(2) | 7061(2) | 6697(1)  | 25(1)          |
| C(24) | 12602(2) | 5765(2) | 6433(1)  | 22(1)          |
| O(1)  | 11426(1) | 1773(1) | 8252(1)  | 28(1)          |
| O(2)  | 14870(1) | 4949(1) | 8333(1)  | 27(1)          |
| F(1)  | 9898(1)  | 2411(1) | 5641(1)  | 29(1)          |
| F(2)  | 10947(1) | 526(1)  | 6182(1)  | 26(1)          |
| F(3)  | 11843(1) | 5208(1) | 5567(1)  | 34(1)          |
| F(4)  | 14446(1) | 6370(1) | 6350(1)  | 40(1)          |

**Table S18.** Bond lengths [ $\text{\AA}$ ] and angles [ $^\circ$ ] for dimer **14**.

|                  |            |                     |            |
|------------------|------------|---------------------|------------|
| C(1)-C(13)       | 1.3367(18) | C(13)-C(24)         | 1.5202(17) |
| C(1)-C(2)        | 1.5217(17) | C(13)-C(14)         | 1.5271(17) |
| C(1)-C(12)       | 1.5269(17) | C(14)-O(2)          | 1.2172(16) |
| C(2)-O(1)        | 1.2144(15) | C(14)-C(15)         | 1.4925(17) |
| C(2)-C(3)        | 1.4933(17) | C(15)-C(16)         | 1.4041(18) |
| C(3)-C(4)        | 1.4027(18) | C(15)-C(20)         | 1.4071(18) |
| C(3)-C(8)        | 1.4128(18) | C(16)-C(17)         | 1.3806(18) |
| C(4)-C(5)        | 1.3819(19) | C(16)-H(16)         | 0.9500     |
| C(4)-H(4)        | 0.9500     | C(17)-C(18)         | 1.386(2)   |
| C(5)-C(6)        | 1.386(2)   | C(17)-H(17)         | 0.9500     |
| C(5)-H(5)        | 0.9500     | C(18)-C(19)         | 1.382(2)   |
| C(6)-C(7)        | 1.384(2)   | C(18)-H(18)         | 0.9500     |
| C(6)-H(6)        | 0.9500     | C(19)-C(20)         | 1.3992(18) |
| C(7)-C(8)        | 1.3960(18) | C(19)-H(19)         | 0.9500     |
| C(7)-H(7)        | 0.9500     | C(20)-C(21)         | 1.5070(18) |
| C(8)-C(9)        | 1.5157(17) | C(21)-C(22)         | 1.539(2)   |
| C(9)-C(10)       | 1.5462(19) | C(21)-H(21A)        | 0.9900     |
| C(9)-H(9A)       | 0.9900     | C(21)-H(21B)        | 0.9900     |
| C(9)-H(9B)       | 0.9900     | C(22)-C(23)         | 1.523(2)   |
| C(10)-C(11)      | 1.5247(18) | C(22)-H(22A)        | 0.9900     |
| C(10)-H(10A)     | 0.9900     | C(22)-H(22B)        | 0.9900     |
| C(10)-H(10B)     | 0.9900     | C(23)-C(24)         | 1.5014(18) |
| C(11)-C(12)      | 1.5040(17) | C(23)-H(23A)        | 0.9900     |
| C(11)-H(11A)     | 0.9900     | C(23)-H(23B)        | 0.9900     |
| C(11)-H(11B)     | 0.9900     | C(24)-F(3)          | 1.3621(15) |
| C(12)-F(1)       | 1.3705(15) | C(24)-F(4)          | 1.3853(16) |
| C(12)-F(2)       | 1.3894(15) |                     |            |
| C(13)-C(1)-C(2)  | 117.47(11) | C(10)-C(9)-H(9B)    | 108.9      |
| C(13)-C(1)-C(12) | 128.58(12) | H(9A)-C(9)-H(9B)    | 107.7      |
| C(2)-C(1)-C(12)  | 113.73(10) | C(11)-C(10)-C(9)    | 115.11(10) |
| O(1)-C(2)-C(3)   | 121.58(11) | C(11)-C(10)-H(10A)  | 108.5      |
| O(1)-C(2)-C(1)   | 116.93(11) | C(9)-C(10)-H(10A)   | 108.5      |
| C(3)-C(2)-C(1)   | 121.48(10) | C(11)-C(10)-H(10B)  | 108.5      |
| C(4)-C(3)-C(8)   | 119.64(12) | C(9)-C(10)-H(10B)   | 108.5      |
| C(4)-C(3)-C(2)   | 115.06(11) | H(10A)-C(10)-H(10B) | 107.5      |
| C(8)-C(3)-C(2)   | 125.24(11) | C(12)-C(11)-C(10)   | 113.26(11) |
| C(5)-C(4)-C(3)   | 121.22(12) | C(12)-C(11)-H(11A)  | 108.9      |
| C(5)-C(4)-H(4)   | 119.4      | C(10)-C(11)-H(11A)  | 108.9      |
| C(3)-C(4)-H(4)   | 119.4      | C(12)-C(11)-H(11B)  | 108.9      |
| C(4)-C(5)-C(6)   | 119.47(12) | C(10)-C(11)-H(11B)  | 108.9      |
| C(4)-C(5)-H(5)   | 120.3      | H(11A)-C(11)-H(11B) | 107.7      |
| C(6)-C(5)-H(5)   | 120.3      | F(1)-C(12)-F(2)     | 103.67(10) |
| C(7)-C(6)-C(5)   | 119.80(12) | F(1)-C(12)-C(11)    | 110.31(10) |
| C(7)-C(6)-H(6)   | 120.1      | F(2)-C(12)-C(11)    | 108.22(10) |
| C(5)-C(6)-H(6)   | 120.1      | F(1)-C(12)-C(1)     | 109.52(10) |
| C(6)-C(7)-C(8)   | 122.28(13) | F(2)-C(12)-C(1)     | 105.89(10) |
| C(6)-C(7)-H(7)   | 118.9      | C(11)-C(12)-C(1)    | 118.15(11) |
| C(8)-C(7)-H(7)   | 118.9      | C(1)-C(13)-C(24)    | 128.07(11) |
| C(7)-C(8)-C(3)   | 117.59(12) | C(1)-C(13)-C(14)    | 117.45(11) |
| C(7)-C(8)-C(9)   | 116.26(11) | C(24)-C(13)-C(14)   | 113.32(10) |
| C(3)-C(8)-C(9)   | 126.13(11) | O(2)-C(14)-C(15)    | 121.57(11) |
| C(8)-C(9)-C(10)  | 113.26(10) | O(2)-C(14)-C(13)    | 115.77(11) |
| C(8)-C(9)-H(9A)  | 108.9      | C(15)-C(14)-C(13)   | 122.66(11) |
| C(10)-C(9)-H(9A) | 108.9      | C(16)-C(15)-C(20)   | 119.40(11) |
| C(8)-C(9)-H(9B)  | 108.9      | C(16)-C(15)-C(14)   | 115.14(11) |

|                     |            |
|---------------------|------------|
| C(20)-C(15)-C(14)   | 125.46(11) |
| C(17)-C(16)-C(15)   | 121.25(12) |
| C(17)-C(16)-H(16)   | 119.4      |
| C(15)-C(16)-H(16)   | 119.4      |
| C(16)-C(17)-C(18)   | 119.56(12) |
| C(16)-C(17)-H(17)   | 120.2      |
| C(18)-C(17)-H(17)   | 120.2      |
| C(19)-C(18)-C(17)   | 119.70(12) |
| C(19)-C(18)-H(18)   | 120.2      |
| C(17)-C(18)-H(18)   | 120.2      |
| C(18)-C(19)-C(20)   | 122.08(12) |
| C(18)-C(19)-H(19)   | 119.0      |
| C(20)-C(19)-H(19)   | 119.0      |
| C(19)-C(20)-C(15)   | 117.92(12) |
| C(19)-C(20)-C(21)   | 117.50(12) |
| C(15)-C(20)-C(21)   | 124.58(11) |
| C(20)-C(21)-C(22)   | 113.06(11) |
| C(20)-C(21)-H(21A)  | 109.0      |
| C(22)-C(21)-H(21A)  | 109.0      |
| C(20)-C(21)-H(21B)  | 109.0      |
| C(22)-C(21)-H(21B)  | 109.0      |
| H(21A)-C(21)-H(21B) | 107.8      |
| C(23)-C(22)-C(21)   | 114.45(11) |
| C(23)-C(22)-H(22A)  | 108.6      |
| C(21)-C(22)-H(22A)  | 108.6      |
| C(23)-C(22)-H(22B)  | 108.6      |
| C(21)-C(22)-H(22B)  | 108.6      |
| H(22A)-C(22)-H(22B) | 107.6      |
| C(24)-C(23)-C(22)   | 113.44(11) |
| C(24)-C(23)-H(23A)  | 108.9      |
| C(22)-C(23)-H(23A)  | 108.9      |
| C(24)-C(23)-H(23B)  | 108.9      |
| C(22)-C(23)-H(23B)  | 108.9      |
| H(23A)-C(23)-H(23B) | 107.7      |
| F(3)-C(24)-F(4)     | 104.44(10) |
| F(3)-C(24)-C(23)    | 108.69(11) |
| F(4)-C(24)-C(23)    | 108.52(11) |
| F(3)-C(24)-C(13)    | 111.77(11) |
| F(4)-C(24)-C(13)    | 104.68(10) |
| C(23)-C(24)-C(13)   | 117.80(10) |

---

Symmetry transformations used to generate equivalent atoms:

**Table S19.** Anisotropic displacement parameters ( $\text{\AA}^2 \times 10^3$ ) for dimer **14**. The anisotropic displacement factor exponent takes the form:  $-2p^2 [ h^2 a^* 2U^{11} + \dots + 2 h k a^* b^* U^{12} ]$

|       | $U^{11}$ | $U^{22}$ | $U^{33}$ | $U^{23}$ | $U^{13}$ | $U^{12}$ |
|-------|----------|----------|----------|----------|----------|----------|
| C(1)  | 15(1)    | 23(1)    | 16(1)    | 0(1)     | 4(1)     | 7(1)     |
| C(2)  | 20(1)    | 18(1)    | 17(1)    | -2(1)    | 3(1)     | 2(1)     |
| C(3)  | 20(1)    | 16(1)    | 18(1)    | -1(1)    | 1(1)     | 2(1)     |
| C(4)  | 23(1)    | 20(1)    | 20(1)    | 1(1)     | 2(1)     | 0(1)     |
| C(5)  | 31(1)    | 19(1)    | 24(1)    | 5(1)     | -3(1)    | 4(1)     |
| C(6)  | 27(1)    | 25(1)    | 34(1)    | 3(1)     | -1(1)    | 12(1)    |
| C(7)  | 24(1)    | 27(1)    | 29(1)    | 3(1)     | 6(1)     | 10(1)    |
| C(8)  | 21(1)    | 18(1)    | 21(1)    | 0(1)     | 2(1)     | 4(1)     |
| C(9)  | 19(1)    | 23(1)    | 23(1)    | 5(1)     | 8(1)     | 7(1)     |
| C(10) | 30(1)    | 23(1)    | 19(1)    | 3(1)     | 10(1)    | 11(1)    |
| C(11) | 27(1)    | 22(1)    | 15(1)    | -2(1)    | 3(1)     | 7(1)     |
| C(12) | 20(1)    | 21(1)    | 21(1)    | -1(1)    | 1(1)     | 6(1)     |
| C(13) | 17(1)    | 23(1)    | 16(1)    | 1(1)     | 4(1)     | 7(1)     |
| C(14) | 19(1)    | 16(1)    | 18(1)    | 3(1)     | 3(1)     | 3(1)     |
| C(15) | 22(1)    | 15(1)    | 16(1)    | 2(1)     | 4(1)     | 3(1)     |
| C(16) | 23(1)    | 18(1)    | 18(1)    | 3(1)     | 2(1)     | 2(1)     |
| C(17) | 32(1)    | 20(1)    | 15(1)    | 0(1)     | 4(1)     | 0(1)     |
| C(18) | 33(1)    | 20(1)    | 22(1)    | 1(1)     | 13(1)    | 5(1)     |
| C(19) | 24(1)    | 20(1)    | 25(1)    | 4(1)     | 8(1)     | 6(1)     |
| C(20) | 22(1)    | 16(1)    | 19(1)    | 2(1)     | 5(1)     | 4(1)     |
| C(21) | 19(1)    | 32(1)    | 23(1)    | -3(1)    | 1(1)     | 10(1)    |
| C(22) | 37(1)    | 41(1)    | 20(1)    | 1(1)     | -1(1)    | 24(1)    |
| C(23) | 39(1)    | 20(1)    | 17(1)    | 3(1)     | 2(1)     | 12(1)    |
| C(24) | 27(1)    | 26(1)    | 15(1)    | 3(1)     | 4(1)     | 9(1)     |
| O(1)  | 29(1)    | 31(1)    | 26(1)    | 8(1)     | 13(1)    | 10(1)    |
| O(2)  | 21(1)    | 36(1)    | 25(1)    | -5(1)    | 0(1)     | 10(1)    |
| F(1)  | 22(1)    | 44(1)    | 22(1)    | -4(1)    | -2(1)    | 13(1)    |
| F(2)  | 30(1)    | 21(1)    | 23(1)    | -2(1)    | 5(1)     | -2(1)    |
| F(3)  | 65(1)    | 32(1)    | 14(1)    | 1(1)     | 1(1)     | 26(1)    |
| F(4)  | 32(1)    | 45(1)    | 48(1)    | 27(1)    | 18(1)    | 13(1)    |



**Table S20.** Hydrogen coordinates (  $\times 10^4$ ) and isotropic displacement parameters ( $\text{\AA}^2 \times 10^3$ ) for dimer **14**.

|        | x     | y     | z     | U(eq) |
|--------|-------|-------|-------|-------|
| H(4)   | 13087 | 3     | 8878  | 26    |
| H(5)   | 15478 | -1165 | 9211  | 31    |
| H(6)   | 17895 | -719  | 8299  | 34    |
| H(7)   | 17895 | 874   | 7067  | 31    |
| H(9A)  | 16972 | 2714  | 6258  | 26    |
| H(9B)  | 15341 | 3401  | 6531  | 26    |
| H(10A) | 15199 | 1735  | 4995  | 27    |
| H(10B) | 14037 | 498   | 5618  | 27    |
| H(11A) | 13165 | 3305  | 5087  | 25    |
| H(11B) | 12069 | 1617  | 4676  | 25    |
| H(16)  | 14365 | 6049  | 9757  | 24    |
| H(17)  | 12997 | 7163  | 10840 | 28    |
| H(18)  | 10102 | 7596  | 10435 | 29    |
| H(19)  | 8531  | 6762  | 8992  | 27    |
| H(21A) | 8014  | 5194  | 7662  | 29    |
| H(21B) | 9516  | 4368  | 7366  | 29    |
| H(22A) | 9085  | 6061  | 6227  | 36    |
| H(22B) | 9343  | 7453  | 6969  | 36    |
| H(23A) | 11971 | 7831  | 6216  | 30    |
| H(23B) | 12494 | 7578  | 7280  | 30    |
